# Supplementary material for: Synthesis and biological evaluation of terminal functionalized thiourea-containing dipeptides as antitumor agents
Source: Royal Society of Chemistry journal article supplement (doi:10.1039/c6ra25590f), 2017-01-01

### Supplementary data

Synthesis and biological evaluation of terminal functionalized thiourea-containing dipeptides as  
antitumor agents

Ri-Zheng Huang <sup>a,b, †</sup>, Bin Zhang <sup>a, †</sup>, Xiao-Chao Huang <sup>b</sup>, Gui-Bin Liang <sup>a</sup>, Jian-Mei Qin <sup>a</sup>, Ying-Ming Pan <sup>a</sup>, Zhi-Xin Liao <sup>b\*</sup> and Heng-Shan Wang <sup>a\*</sup>

<sup>a</sup> *State Key Laboratory for the Chemistry and Molecular Engineering of Medicinal Resources (Ministry of Education of China), School of Chemistry and Pharmaceutical Sciences of Guangxi Normal University, Guilin 541004, PR China*

<sup>b</sup> *Pharmaceutical Research Center and School of Chemistry and Chemical Engineering, Southeast University, Nanjing 211189, China*

\* Corresponding author. State Key Laboratory for Chemistry and Molecular Engineering of Medicinal Resources, School of Chemistry & Pharmaceutical Science of Guangxi Normal University, Yucai Road 15, Guilin 541004, Guangxi, PR China.

\*Corresponding author. E-mail addresses: whengshan@163.com (H. -S. Wang),  
zxliao@seu.edu.cn (Z.-X. Liao).

† Co-first author: These authors contributed equally to this work.

### spectral data of title compounds

*1-(1-(1-(2,5-dimethoxyphenylamino)-1-oxo-3-phenylpropan-2-ylamino)-3-methyl-1-oxopentan-2-yl)-3-(3-nitrophenyl)thiourea (I-1)*. Yield 77.4%. Mp 187.5–190.1 °C.  $[\alpha_D]^{20} = -29.2$  (c 0.1, AcOEt).  $^1\text{H NMR}$  (400 MHz, DMSO- $d_6$ )  $\delta$  10.15 (s, 1H), 9.06 (s, 1H), 8.84 (s, 1H), 8.61 (d,  $J = 7.9$  Hz, 1H), 7.97 (d,  $J = 8.5$  Hz, 1H), 7.92 (dd,  $J = 8.2, 1.5$  Hz, 1H), 7.83 (dd,  $J = 8.1, 1.2$  Hz, 1H), 7.73 (d,  $J = 2.7$  Hz, 1H), 7.58 (t,  $J = 8.2$  Hz, 1H), 7.33 (d,  $J = 7.3$  Hz, 2H), 7.23 (t,  $J = 7.4$  Hz, 2H), 7.16 (d,  $J = 7.3$  Hz, 1H), 6.94 (d,  $J = 9.0$  Hz, 1H), 6.62 (dd,  $J = 8.9, 3.0$  Hz, 1H), 5.00–4.90 (m, 1H), 4.82 (dd,  $J = 13.0, 8.7$  Hz, 1H), 3.76 (s, 3H), 3.68 (s, 3H), 3.15 and 2.96 (dd,  $J = 13.9, 4.7$  Hz, 1H; dd,  $J = 13.8, 9.7$  Hz, 1H), 1.90–1.80 (m, 1H), 1.44 and 1.08 (ddd,  $J = 13.1, 7.4, 3.1$  Hz, 1H; td,  $J = 13.7, 8.2$  Hz, 1H), 0.91–0.73 (m, 6H,  $2 \times \text{CH}_3$ ).  $^{13}\text{C NMR}$  (100 MHz, DMSO- $d_6$ )  $\delta$  180.4, 170.9, 169.7, 152.9, 147.5, 143.1, 141.0, 137.6, 129.7, 129.3, 129.3, 128.0, 128.0, 127.8, 126.2, 117.9, 115.9, 111.8, 108.0, 107.5, 60.9, 56.2, 55.3, 55.3, 54.9, 37.5, 36.7, 24.3, 15.1, 11.3. ESI-HRMS  $m/z$  calcd for  $\text{C}_{30}\text{H}_{35}\text{N}_5\text{O}_6\text{S}$   $[\text{M}+\text{H}]^+$ : 594.2381 found: 594.2355.

*1-(1-(1-(3,5-dimethoxyphenylamino)-1-oxo-3-phenylpropan-2-ylamino)-3-methyl-1-oxopentan-2-yl)-3-(3-nitrophenyl)thiourea (I-2)*. Yield 80.7%. Mp 187.5–190.1 °C.  $[\alpha_D]^{20} = -30.0$  (c 0.1, AcOEt).  $^1\text{H NMR}$  (400 MHz, DMSO- $d_6$ )  $\delta$  10.18 (s, 1H), 9.86 (s, 1H), 8.84 (s, 1H), 8.41 (d,  $J = 7.9$  Hz, 1H), 7.94 (dd,  $J = 16.9, 8.2$  Hz, 2H), 7.84 (d,  $J = 8.1$  Hz, 1H), 7.58 (t,  $J = 8.2$  Hz, 1H), 7.30 (d,  $J = 7.2$  Hz, 2H), 7.25 (t,  $J = 7.3$  Hz, 2H), 7.18 (d,  $J = 7.1$  Hz, 1H), 6.82 (d,  $J = 1.9$  Hz, 2H), 6.22 (s, 1H), 4.88 (t,  $J = 6.6$  Hz, 1H), 4.70 (dd,  $J = 13.5, 8.4$  Hz, 1H), 3.70 (s, 6H), 3.09 and 2.94 (dd,  $J = 13.8, 5.0$  Hz, 1H; dd,  $J = 13.8, 9.5$  Hz, 1H), 1.86 (d,  $J = 6.1$  Hz, 1H), 1.46–1.33 and 1.12–1.02 (m, 1H; m, 1H), 0.83 (dd,  $J = 13.9, 6.8$  Hz, 6H,  $2 \times \text{CH}_3$ ).  $^{13}\text{C NMR}$  (100 MHz, DMSO- $d_6$ )  $\delta$  180.4, 170.6, 169.8, 160.5, 147.5, 141.0, 140.3, 137.5, 129.7, 129.2, 129.2, 128.1, 128.1, 127.9, 126.4, 118.0, 115.8, 97.7, 97.6, 95.4, 61.1, 55.1, 55.1, 55.0, 37.5, 37.4, 24.3, 15.23, 14.8, 11.4. ESI-HRMS  $m/z$  calcd for  $\text{C}_{30}\text{H}_{35}\text{N}_5\text{O}_6\text{S}$   $[\text{M}-\text{H}]^-$ : 592.2235 found: 592.2240.

*1-(1-(1-(3,5-dimethylphenylamino)-1-oxo-3-phenylpropan-2-ylamino)-3-methyl-1-oxobutan-2-yl)-3-(3-nitrophenyl)thiourea (I-3)*. Yield 90.5%. Mp 197.7–200.5 °C.  $[\alpha_D]^{20} = -24.5$  (c 0.1, AcOEt).  $^1\text{H NMR}$  (500 MHz, DMSO- $d_6$ )  $\delta$  10.19 (s, 1H), 9.76 (s, 1H), 8.86 (s, 1H), 8.41 (d,  $J = 8.0$  Hz, 1H), 7.98 (d,  $J = 8.3$  Hz, 1H), 7.92 (dd,  $J = 8.2, 1.4$  Hz, 1H), 7.86–7.80 (m, 1H), 7.58 (t,  $J = 8.2$  Hz, 1H), 7.31 (d,  $J = 7.3$  Hz, 2H), 7.24 (t,  $J = 7.4$  Hz, 2H), 7.18 (d,  $J = 11.3$  Hz, 3H), 6.69 (s, 1H), 4.88 (t,  $J = 7.1$  Hz, 1H), 4.71 (dd,  $J = 13.8, 8.5$  Hz, 1H), 3.08 and 2.94 (dd,  $J = 13.9, 5.1$  Hz, 1H; dd,  $J = 13.8, 9.3$  Hz, 1H), 2.22 (s, 6H), 1.89–1.78 (m, 1H), 1.41 and 1.08 (ddd,  $J = 10.0, 6.7, 2.9$  Hz, 1H; dd,  $J = 13.7, 8.9$  Hz, 1H), 0.83 (dd,  $J = 15.5, 7.6$  Hz, 6H,  $2 \times \text{CH}_3$ ).  $^{13}\text{C NMR}$  (125 MHz, DMSO- $d_6$ )  $\delta$  180.4, 170.5, 169.5, 147.5, 141.1, 138.6, 137.6, 137.5, 129.7, 129.2, 129.2, 128.1, 128.1, 127.8, 126.3, 125.0, 118.0, 117.2, 117.2, 115.8, 61.1, 54.9, 37.5, 31.1, 29.8, 24.4, 21.1, 21.1, 15.2, 11.4. ESI-HRMS  $m/z$  calcd for  $\text{C}_{30}\text{H}_{35}\text{N}_5\text{O}_4\text{S}$   $[\text{M}-\text{H}]^-$ : 560.2337 found: 560.2342.

*1-(3-methyl-1-oxo-1-(1-oxo-3-phenyl-1-(3,4,5-trimethoxyphenylamino)propan-2-ylamino)pentan-2-yl)-3-(3-nitrophenyl)thiourea (I-4)*. Yield 79.4%. Mp 107.4–123.2 °C.  $[\alpha_D]^{20} = -$

31.1 (*c* 0.1, AcOEt). <sup>1</sup>H NMR (400 MHz, DMSO-*d*<sub>6</sub>) δ 10.19 (s, 1H), 9.82 (s, 1H), 8.84 (s, 1H), 8.39 (d, *J* = 7.7 Hz, 1H), 7.97 (d, *J* = 7.8 Hz, 1H), 7.92 (d, *J* = 7.8 Hz, 1H), 7.84 (d, *J* = 7.8 Hz, 1H), 7.58 (t, *J* = 8.1 Hz, 1H), 7.31 (d, *J* = 6.9 Hz, 2H), 7.25 (t, *J* = 7.2 Hz, 2H), 7.18 (d, *J* = 7.0 Hz, 1H), 6.95 (s, 2H), 4.87 (s, 1H), 4.69 (d, *J* = 4.4 Hz, 1H), 3.72 (s, 6H), 3.62 (s, 3H, OCH<sub>3</sub>), 3.10 and 3.02–2.90 (dd, *J* = 13.6, 4.4 Hz, 1H; m, 1H), 1.85 (s, 1H), 1.36 and 1.11–0.99 (d, *J* = 16.0 Hz, 1H; m, 1H), 0.82 (dd, *J* = 14.1, 6.8 Hz, 6H, 2 × CH<sub>3</sub>). <sup>13</sup>C NMR (125 MHz, DMSO-*d*<sub>6</sub>) δ 180.6, 170.6, 169.6, 152.7, 152.7, 147.5, 141.0, 137.6, 134.8, 133.6, 129.7, 129.2, 129.2, 128.1, 128.1, 127.9, 126.4, 118.1, 115.9, 97.2, 97.2, 61.3, 60.1, 60.1, 55.7, 55.7, 55.0, 37.4, 24.3, 15.3, 11.4. ESI-HRMS *m/z* calcd for C<sub>31</sub>H<sub>37</sub>N<sub>5</sub>O<sub>7</sub>S[M-H]<sup>-</sup>: 622.2341 found: 622.2343.

*1-(3-chlorophenyl)-3-(1-(1-(4-methoxyphenylamino)-1-oxo-3-phenylpropan-2-ylamino)-3-methyl-1-oxopentan-2-yl)thiourea (I-5)*. Yield 76.5%. Mp 169.9–173.5 °C. [ $\alpha$ <sub>D</sub>]<sup>20</sup> = -27.0 (*c* 0.1, AcOEt). <sup>1</sup>H NMR (400 MHz, DMSO-*d*<sub>6</sub>) δ 9.92 (s, 1H), 9.74 (s, 1H), 8.35 (d, *J* = 8.0 Hz, 1H), 7.96 (s, 1H), 7.83 (d, *J* = 8.1 Hz, 1H), 7.46 (d, *J* = 8.9 Hz, 2H), 7.35 (dd, *J* = 10.3, 8.1 Hz, 2H), 7.29 (d, *J* = 7.0 Hz, 2H), 7.24 (t, *J* = 7.4 Hz, 2H), 7.17 (d, *J* = 7.1 Hz, 1H), 7.13 (d, *J* = 7.4 Hz, 1H), 6.87 (d, *J* = 9.0 Hz, 2H), 4.85 (d, *J* = 6.5 Hz, 1H), 4.70 (dd, *J* = 13.9, 8.4 Hz, 1H), 3.72 (s, 3H), 3.09 and 2.95 (dd, *J* = 13.8, 5.2 Hz, 1H; dd, *J* = 13.7, 9.3 Hz, 1H), 1.83 (d, *J* = 6.1 Hz, 1H), 1.39 and 1.11–0.97 (dd, *J* = 11.9, 5.6 Hz, 1H; m, 1H), 0.82 (d, *J* = 7.8 Hz, 6H, 2 × CH<sub>3</sub>). <sup>13</sup>C NMR (100 MHz, DMSO-*d*<sub>6</sub>) δ 180.3, 170.5, 169.1, 155.4, 141.2, 137.6, 132.5, 131.8, 130.0, 129.2, 129.2, 128.0, 128.0, 126.3, 123.4, 121.4, 121.4, 121.0, 120.4, 113.8, 113.8, 61.2, 55.1, 54.7, 37.5, 37.4, 24.4, 15.2, 11.4. ESI-HRMS *m/z* calcd for C<sub>29</sub>H<sub>33</sub>ClN<sub>4</sub>O<sub>3</sub>S [M-H]<sup>-</sup>: 551.1889 found: 551.1903.

*1-(3-chloro-4-methylphenyl)-3-(1-(1-(4-methoxyphenylamino)-1-oxo-3-phenylpropan-2-ylamino)-3-methyl-1-oxopentan-2-yl)thiourea (I-6)*. Yield 88.1%. Mp 126.7–131.1 °C. [ $\alpha$ <sub>D</sub>]<sup>20</sup> = -20.4 (*c* 0.1, AcOEt). <sup>1</sup>H NMR (400 MHz, DMSO-*d*<sub>6</sub>) δ 9.81 (s, 1H), 9.73 (s, 1H), 8.34 (d, *J* = 8.0 Hz, 1H), 7.86 (s, 1H), 7.73 (d, *J* = 8.1 Hz, 1H), 7.47 (d, *J* = 8.9 Hz, 2H), 7.30 (d, *J* = 7.2 Hz, 2H), 7.27–7.22 (m, 4H), 7.17 (t, *J* = 7.1 Hz, 1H), 6.87 (d, *J* = 9.0 Hz, 2H), 4.85 (s, 1H), 4.70 (dd, *J* = 13.9, 8.5 Hz, 1H), 3.72 (s, 3H), 3.10 and 2.95 (dd, *J* = 13.8, 5.2 Hz, 1H; dd, *J* = 13.7, 9.3 Hz, 1H), 2.28 (s, 3H), 1.90–1.75 (m, 1H), 1.42–1.34 and 1.12–1.00 (m, 1H; m, 1H), 0.81 (t, *J* = 7.6 Hz, 6H, 2 × CH<sub>3</sub>). <sup>13</sup>C NMR (100 MHz, DMSO-*d*<sub>6</sub>) δ 180.5, 170.6, 169.1, 155.4, 138.7, 137.6, 132.5, 131.8, 130.8, 130.6, 129.2, 128.0, 126.3, 122.4, 121.1, 121.0, 113.8, 61.2, 55.1, 54.7, 37.5, 37.4, 24.4, 18.9, 15.2, 11.4. ESI-HRMS *m/z* calcd for C<sub>30</sub>H<sub>35</sub>ClN<sub>4</sub>O<sub>3</sub>S [M-H]<sup>-</sup>: 565.2046 found: 565.2054.

*1-(2,4-dibromophenyl)-3-(3-methyl-1-oxo-1-(1-oxo-3-phenyl-1-(3,4,5-trimethoxyphenylamino)propan-2-ylamino)pentan-2-yl)thiourea (I-7)*. Yield 82.8%. Mp 139.6–143.5 °C. [ $\alpha$ <sub>D</sub>]<sup>20</sup> = -16.6 (*c* 0.1, AcOEt). <sup>1</sup>H NMR (400 MHz, DMSO-*d*<sub>6</sub>) δ 9.82 (s, 1H), 9.33 (s, 1H), 8.31 (d, *J* = 7.8 Hz, 1H), 8.21 (d, *J* = 8.4 Hz, 1H), 7.87 (d, *J* = 2.0 Hz, 1H), 7.67 (d, *J* = 8.6 Hz, 1H), 7.52 (dd, *J* = 8.6, 1.8 Hz, 1H), 7.28 (dt, *J* = 14.9, 7.4 Hz, 4H), 7.20 (d, *J* = 7.0 Hz, 1H), 6.95 (s, 2H), 4.86 (t, *J* = 6.9 Hz, 1H), 4.68 (dd, *J* = 13.7, 8.0 Hz, 1H), 3.72 (s, 6H), 3.62 (s, 3H), 3.09 and 2.95 (dd, *J* = 13.8, 5.2 Hz, 1H; dd, *J* = 13.8, 9.2 Hz, 1H), 1.86 (d, *J* = 6.1 Hz, 1H), 1.46–1.35 and 1.17–1.01 (m, 1H; m, 1H), 0.83 (dd, *J* = 13.6, 6.8 Hz, 6H, 2 × CH<sub>3</sub>). <sup>13</sup>C NMR (101

MHz, DMSO- $d_6$ )  $\delta$ 181.68, 170.62, 169.50, 152.67, 152.67, 137.48, 134.77, 134.15, 133.62, 130.81, 130.26, 129.12, 129.12, 128.11, 128.11, 126.37, 120.33, 118.10, 97.26, 97.26, 61.67, 60.09, 60.09, 55.69, 55.69, 54.87, 37.46, 37.36, 24.31, 15.22, 11.35. ESI-HRMS  $m/z$  calcd for  $C_{31}H_{36}Br_2N_4O_5S$   $[M-H]^-$ : 773.0700 found: 773.0687.

*1-(1-(1-(4-methoxyphenylamino)-1-oxo-3-phenylpropan-2-ylamino)-3-methyl-1-oxopentan-2-yl)-3-(naphthalen-2-yl)thiourea (I-8)*. Yield 84.7%. Mp 127.6–131.5 °C.  $[\alpha_D]^{20} = -13.2$  ( $c$  0.1, AcOEt).  $^1H$  NMR (400 MHz, DMSO- $d_6$ )  $\delta$  7.97–7.95 (m, 1H), 7.93 (d,  $J = 7.2$  Hz, 1H), 7.89 (dd,  $J = 7.0, 2.2$  Hz, 1H), 7.57–7.43 (m, 4H), 7.34 (d,  $J = 2.2$  Hz, 1H), 7.33 (d,  $J = 2.2$  Hz, 1H), 7.28–7.22 (m, 4H), 7.21–7.15 (m, 1H), 6.80 (d,  $J = 9.1$  Hz, 2H), 4.84 (d,  $J = 6.8$  Hz, 1H), 4.73 (dd,  $J = 8.4, 6.5$  Hz, 1H), 3.75 (s, 3H), 3.23 and 3.01 (dd,  $J = 13.7, 6.4$  Hz, 1H; dd,  $J = 13.7, 8.5$  Hz, 1H), 1.73 (dd,  $J = 6.1, 3.1$  Hz, 1H), 1.28–1.18 and 0.93–0.84 (m, 1H; m, 1H), 0.76 (dd,  $J = 8.3, 7.3$  Hz, 6H,  $2 \times CH_3$ ).  $^{13}C$  NMR (101 MHz, DMSO- $d_6$ )  $\delta$ 182.3, 170.7, 169.2, 155.3, 137.6, 134.6, 133.9, 131.8, 129.6, 129.2, 128.2, 128.1, 126.4, 126.2, 125.5, 124.9, 122.6, 120.9, 113.8, 61.6, 55.1, 54.8, 37.5, 24.4, 15.2, 11.4. ESI-HRMS  $m/z$  calcd for  $C_{33}H_{36}N_4O_3S$   $[M+H]^+$ : 569.2581 found: 569.2556.

*N-(3-chloro-4-fluorophenyl)-2-(2-(3-(3-fluorophenyl)thioureido)-3-phenylpropanamido)-3-phenylpropanamide (I-9)*. Yield 79.6%. Mp 108.6–121.5 °C.  $[\alpha_D]^{20} = -29.8$  ( $c$  0.1, AcOEt).  $^1H$  NMR (500 MHz, DMSO- $d_6$ )  $\delta$  10.31 (s, 1H), 10.05 (s, 1H), 8.76 (d,  $J = 7.7$  Hz, 1H), 7.96 (s, 1H), 7.91 (d,  $J = 6.6$  Hz, 1H), 7.85 (d,  $J = 7.3$  Hz, 1H), 7.51 (d,  $J = 8.7$  Hz, 1H), 7.47 (d,  $J = 8.8$  Hz, 1H), 7.39 (t,  $J = 9.0$  Hz, 1H), 7.28 (dd,  $J = 13.8, 6.3$  Hz, 5H), 7.23–7.10 (m, 7H), 5.14 (d,  $J = 5.5$  Hz, 1H), 4.69 (dd,  $J = 14.3, 7.6$  Hz, 1H), 3.29–3.19 (m, 1H), 3.09 (dd,  $J = 13.7, 5.3$  Hz, 1H), 2.97 (dt,  $J = 13.9, 7.1$  Hz, 2H).  $^{13}C$  NMR (125 MHz, DMSO- $d_6$ )  $\delta$ 179.6, 170.4, 170.0, 152.3, 139.5, 137.2, 136.9, 135.9, 130.6, 130.3, 129.5, 129.2, 128.2, 128.0, 126.5, 126.4, 125.4, 123.4, 122.3, 120.8, 119.7, 119.2, 119.1, 117.1, 116.9, 57.7, 54.9, 37.5, 37.4. ESI-HRMS  $m/z$  calcd for  $C_{31}H_{27}ClF_2N_4O_2S$   $[M+Na]^+$ : 615.1404 found: 615.1421.

*2-(3-(3,4-dichlorophenyl)thioureido)-N-(1-oxo-3-phenyl-1-((3-(trifluoromethyl)phenyl)amino)propan-2-yl)-3-phenylpropanamide (I-10)*. Yield 82.0%. Mp 113.6–119.0 °C.  $[\alpha_D]^{20} = -25.3$  ( $c$  0.1, AcOEt).  $^1H$  NMR (500 MHz, DMSO- $d_6$ )  $\delta$  10.44 (s, 1H), 10.06 (s, 1H), 8.78 (d,  $J = 7.7$  Hz, 1H), 8.09 (s, 1H), 7.97 (s, 1H), 7.85 (d,  $J = 7.4$  Hz, 1H), 7.79 (d,  $J = 8.1$  Hz, 1H), 7.58 (t,  $J = 8.0$  Hz, 1H), 7.51 (d,  $J = 8.7$  Hz, 1H), 7.44 (d,  $J = 7.7$  Hz, 1H), 7.29 (dt,  $J = 15.0, 7.8$  Hz, 5H), 7.23–7.06 (m, 6H), 5.16 (d,  $J = 5.2$  Hz, 1H), 4.84–4.52 (m, 1H), 3.28–3.17 (m, 1H), 3.12 (dd,  $J = 13.8, 5.5$  Hz, 1H), 3.05–2.81 (m, 2H).  $^{13}C$  NMR (125 MHz, DMSO- $d_6$ )  $\delta$ 179.6, 170.4, 170.3, 139.5, 139.5, 137.3, 136.9, 130.6, 130.3, 130.1, 129.5, 129.4, 129.2, 128.2, 127.9, 126.5, 126.3, 125.4, 125.2, 123.4, 123.0, 122.9, 122.3, 119.9, 119.6, 115.5, 57.6, 54.9, 37.4, 37.4. ESI-HRMS  $m/z$  calcd for  $C_{32}H_{27}Cl_2F_3N_4O_2S$   $[M+Na]^+$ : 681.1076 found: 681.1068.

*N-(1-oxo-3-phenyl-1-((3-(trifluoromethyl)phenyl)amino)propan-2-yl)-3-phenyl-2-(3-(3-(trifluoromethyl)phenyl)thioureido)propanamide (I-11)*. Yield 78.3%. Mp 143.8–150.6 °C.  $[\alpha_D]^{20} = -26.0$  ( $c$  0.2, AcOEt).  $^1H$  NMR (500 MHz, DMSO- $d_6$ )  $\delta$  10.45 (s, 1H), 10.15 (s, 1H), 8.80 (d,  $J = 7.8$  Hz, 1H), 8.10 (s, 2H), 7.85 (d,  $J = 7.5$  Hz, 1H), 7.80 (d,  $J = 8.4$  Hz, 1H), 7.59 (dd,  $J = 17.8, 9.0$

Hz, 2H), 7.50 (t,  $J = 7.9$  Hz, 1H), 7.42 (dd,  $J = 15.7, 7.8$  Hz, 2H), 7.33 (d,  $J = 7.3$  Hz, 2H), 7.28 (t,  $J = 7.5$  Hz, 2H), 7.22–7.16 (m, 3H), 7.15–7.10 (m, 3H), 5.18 (dd,  $J = 12.3, 6.8$  Hz, 1H), 4.74 (td,  $J = 8.4, 5.9$  Hz, 1H), 3.27 (dd,  $J = 13.8, 4.7$  Hz, 1H), 3.13 (dd,  $J = 13.9, 5.6$  Hz, 1H), 3.00 (ddd,  $J = 13.7, 7.7, 5.9$  Hz, 2H).  $^{13}\text{C}$  NMR (125 MHz, DMSO- $d_6$ )  $\delta$  179.8, 170.5, 170.4, 140.3, 139.5, 137.3, 136.9, 130.1, 129.7, 129.6, 129.4, 129.0, 128.2, 127.9, 126.5, 126.3, 125.9, 125.2, 125.1, 123.1, 123.00, 122.9, 120.2, 119.9, 118.4, 115.5, 115.4, 57.5, 55.0, 37.5. ESI-HRMS  $m/z$  calcd for  $\text{C}_{33}\text{H}_{28}\text{F}_6\text{N}_4\text{O}_2\text{S}$   $[\text{M}+\text{Na}]^+$ : 681.1729 found: 681.1722.

2-(3-(3,4-dichlorophenyl)thioureido)-N-(1-oxo-3-phenyl-1-(*o*-tolylamino)propan-2-yl)-3-phenylpropanamide (**I-12**). Yield 84.5%. Mp 151.2–157.6 °C.  $[\alpha_D]^{20} = -43.0$  (c 0.1, AcOEt).  $^1\text{H}$  NMR (500 MHz, DMSO- $d_6$ )  $\delta$  10.09 (s, 1H), 9.44 (s, 1H), 8.75 (d,  $J = 7.9$  Hz, 1H), 8.00 (d,  $J = 2.3$  Hz, 1H), 7.88 (d,  $J = 7.5$  Hz, 1H), 7.52 (d,  $J = 8.7$  Hz, 1H), 7.40–7.27 (m, 6H), 7.24–7.14 (m, 8H), 7.10 (td,  $J = 7.4, 1.1$  Hz, 1H), 5.16 (dd,  $J = 12.2, 6.8$  Hz, 1H), 4.83 (dd,  $J = 14.6, 8.2$  Hz, 1H), 3.27 (dd,  $J = 13.8, 4.8$  Hz, 1H), 3.13 (dd,  $J = 13.7, 6.2$  Hz, 1H), 3.05–2.90 (m, 2H), 2.07 (s, 3H,  $\text{CH}_3$ ).  $^{13}\text{C}$  NMR (125 MHz, DMSO- $d_6$ )  $\delta$  179.6, 170.3, 169.7, 139.6, 137.5, 136.9, 135.9, 132.0, 130.6, 130.3, 129.6, 129.3, 128.2, 128.0, 126.5, 126.4, 125.9, 125.4, 125.4, 125.1, 123.3, 122.2, 57.6, 54.5, 37.8, 37.4, 17.7. ESI-HRMS  $m/z$  calcd for  $\text{C}_{32}\text{H}_{30}\text{Cl}_2\text{N}_4\text{O}_2\text{S}$   $[\text{M}+\text{Na}]^+$ : 627.1359 found: 627.1354.

N-(3-fluorophenyl)-3-phenyl-2-(3-phenyl-2-(3-(3-(trifluoromethyl)phenyl)thioureido)propanamido)propanamide (**I-13**). Yield 86.5%. Mp 132.3–141.2 °C.  $[\alpha_D]^{20} = -22.1$  (c 0.1, AcOEt).  $^1\text{H}$  NMR (500 MHz,  $\text{CDCl}_3$ )  $\delta$  9.17 (s, 1H), 9.06 (s, 1H), 8.47 (s, 1H), 7.67 (s, 1H), 7.57 (s, 1H), 7.45 (d,  $J = 3.8$  Hz, 2H), 7.39 (d,  $J = 5.2$  Hz, 2H), 7.21 (d,  $J = 7.6$  Hz, 1H), 7.16 (d,  $J = 6.3$  Hz, 2H), 7.03 (dd,  $J = 13.6, 6.2$  Hz, 5H), 6.91 (d,  $J = 4.0$  Hz, 1H), 6.85 (d,  $J = 3.3$  Hz, 4H), 5.43 (s, 1H), 5.06 (s, 1H), 3.11 (dd,  $J = 21.7, 8.4$  Hz, 2H), 2.91 (d,  $J = 7.9$  Hz, 1H), 2.78 (s, 1H).  $^{13}\text{C}$  NMR (125 MHz,  $\text{CDCl}_3$ )  $\delta$  180.1, 171.2, 170.8, 138.6, 137.7, 135.8, 135.3, 134.9, 131.5, 131.2, 130.2, 129.6, 129.5, 128.9, 128.8, 128.5, 128.4, 127.5, 126.9, 125.72, 124.9, 122.7, 121.8, 121.5, 119.2, 59.2, 55.9, 39.2, 38.2. ESI-HRMS  $m/z$  calcd for  $\text{C}_{32}\text{H}_{28}\text{F}_4\text{N}_4\text{O}_2\text{S}$   $[\text{M}+\text{K}]^+$ : 647.1501 found: 647.1458.

2-(3-(3,4-dichlorophenyl)thioureido)-N-(1-((3-fluorophenyl)amino)-1-oxo-3-phenylpropan-2-yl)-3-phenylpropanamide (**I-14**). Yield 80.2%. Mp 118.6–123.2 °C.  $[\alpha_D]^{20} = -29.4$  (c 0.1, AcOEt).  $^1\text{H}$  NMR (500 MHz, DMSO- $d_6$ )  $\delta$  10.29 (s, 1H), 10.06 (s, 1H), 8.76 (d,  $J = 7.9$  Hz, 1H), 7.97 (d,  $J = 2.2$  Hz, 1H), 7.90–7.77 (m, 2H), 7.51 (d,  $J = 8.7$  Hz, 1H), 7.47–7.43 (m, 1H), 7.36 (t,  $J = 8.1$  Hz, 1H), 7.33–7.25 (m, 5H), 7.20 (d,  $J = 7.2$  Hz, 1H), 7.18–7.11 (m, 6H), 5.14 (dd,  $J = 12.3, 7.0$  Hz, 1H), 4.72 (td,  $J = 8.5, 5.9$  Hz, 1H), 3.23 (dd,  $J = 13.9, 4.7$  Hz, 1H), 3.10 (dd,  $J = 13.9, 5.6$  Hz, 1H), 3.05–2.87 (m, 2H).  $^{13}\text{C}$  NMR (125 MHz, DMSO- $d_6$ )  $\delta$  179.6, 170.4, 170.2, 140.1, 139.5, 137.3, 136.9, 133.1, 130.6, 130.5, 130.3, 129.5, 129.2, 128.2, 128.0, 126.5, 126.4, 125.4, 123.4, 123.3, 122.2, 118.9, 117.8, 57.6, 54.9, 37.5, 37.4. ESI-HRMS  $m/z$  calcd for  $\text{C}_{31}\text{H}_{27}\text{Cl}_2\text{FN}_4\text{O}_2\text{S}$   $[\text{M}+\text{K}]^+$ : 647.0847 found: 647.0806.

*N*-(3-fluorophenyl)-2-(2-(3-(3-methoxyphenyl)thioureido)-3-phenylpropanamido)-3-phenylpropanamide (**I-15**). Yield 76.6%. Mp 144.6–149.5 °C.  $[\alpha_D]^{20} = -46.2$  (*c* 0.1, AcOEt).  $^1\text{H}$  NMR (500 MHz,  $\text{CDCl}_3$ )  $\delta$  8.59 (s, 1H), 8.34 (s, 1H), 7.58 (s, 1H), 7.28 (s, 1H), 7.23–7.18 (m, 1H), 7.15 (d,  $J = 3.2$  Hz, 4H), 7.12–7.06 (m, 3H), 7.05–6.94 (m, 6H), 6.81 (dd,  $J = 8.3, 1.9$  Hz, 1H), 6.63 (s, 2H), 6.48 (d,  $J = 7.2$  Hz, 1H), 5.14 (q,  $J = 6.3$  Hz, 1H), 4.84 (dd,  $J = 14.2, 7.1$  Hz, 1H), 3.73 (s, 3H, OCH<sub>3</sub>), 3.16–2.91 (m, 4H).  $^{13}\text{C}$  NMR (125 MHz,  $\text{CDCl}_3$ )  $\delta$  180.4, 170.9, 169.3, 160.9, 138.6, 136.9, 136.1, 135.5, 134.5, 130.9, 129.9, 129.4, 129.3, 129.2, 128.9, 128.9, 127.4, 127.3, 124.8, 120.8, 118.6, 117.0, 113.0, 110.9, 59.7, 55.5, 55.1, 37.7, 37.5. ESI-HRMS  $m/z$  calcd for  $\text{C}_{32}\text{H}_{31}\text{FN}_4\text{O}_3\text{S}$   $[\text{M}+\text{K}]^+$ : 609.1732 found: 609.1694.

2-(3-(3-chlorophenyl)thioureido)-*N*-(1-((3,5-dimethylphenyl)amino)-1-oxo-3-phenylpropan-2-yl)-3-phenylpropanamide (**I-16**). Yield 83.1%. Mp 139.6–147.2 °C.  $[\alpha_D]^{20} = -37.0$  (*c* 0.2, AcOEt).  $^1\text{H}$  NMR (500 MHz,  $\text{CDCl}_3$ )  $\delta$  9.16 (d,  $J = 33.1$  Hz, 2H), 8.69 (s, 1H), 7.63 (s, 1H), 7.43 (s, 1H), 7.24 (d,  $J = 6.0$  Hz, 2H), 7.15 (s, 3H), 7.07 (s, 2H), 6.96 (s, 3H), 6.85 (s, 1H), 6.78 (d,  $J = 6.8$  Hz, 5H), 5.44 (s, 1H), 5.12 (s, 1H), 3.19–2.96 (m, 2H), 2.90 (d,  $J = 23.0$  Hz, 1H), 2.76 (s, 1H), 2.07 (s, 6H, 2×CH<sub>3</sub>).  $^{13}\text{C}$  NMR (125 MHz,  $\text{CDCl}_3$ )  $\delta$  179.8, 171.0, 170.7, 139.7, 140.0, 139.0, 136.4, 136.2, 135.4, 134.3, 129.9, 129.6, 128.7, 128.3, 127.6, 127.2, 126.6, 125.6, 124.6, 122.9, 119.4, 59.1, 56.1, 39.24, 38.1, 21.2. ESI-HRMS  $m/z$  calcd for  $\text{C}_{33}\text{H}_{33}\text{ClN}_4\text{O}_2\text{S}$   $[\text{M}+\text{Na}]^+$ : 607.1905 found: 607.1900.

2-(3-(4-chlorophenyl)thioureido)-*N*-(1-((3,5-dimethylphenyl)amino)-1-oxo-3-phenylpropan-2-yl)-3-phenylpropanamide (**I-17**). Yield 84.4%. Mp 143.6–154.2 °C.  $[\alpha_D]^{20} = -38.0$  (*c* 0.1, AcOEt).  $^1\text{H}$  NMR (400 MHz,  $\text{DMSO}-d_6$ )  $\delta$  9.91 (d,  $J = 12.1$  Hz, 2H), 8.63 (d,  $J = 8.0$  Hz, 1H), 7.66 (d,  $J = 7.4$  Hz, 1H), 7.43 (d,  $J = 8.8$  Hz, 2H), 7.35–7.30 (m, 4H), 7.27 (t,  $J = 7.5$  Hz, 2H), 7.23 (s, 2H), 7.20 (d,  $J = 7.1$  Hz, 1H), 7.15 (d,  $J = 9.8$  Hz, 5H), 6.72 (s, 1H), 5.13 (d,  $J = 5.4$  Hz, 1H), 4.72 (td,  $J = 8.6, 5.7$  Hz, 1H), 3.25–3.18 (m, 1H), 3.09 (dd,  $J = 13.8, 5.3$  Hz, 1H), 2.95 (ddd,  $J = 13.7, 7.8, 6.0$  Hz, 2H), 2.25 (s, 6H, 2×CH<sub>3</sub>).  $^{13}\text{C}$  NMR (100 MHz,  $\text{DMSO}-d_6$ )  $\delta$  179.7, 170.4, 169.6, 138.6, 138.2, 137.7, 137.5, 137.0, 129.5, 129.2, 128.4, 128.1, 128.0, 127.8, 126.4, 126.3, 125.1, 124.1, 117.3, 57.7, 54.8, 37.6, 37.4, 21.1. ESI-HRMS  $m/z$  calcd for  $\text{C}_{33}\text{H}_{33}\text{ClN}_4\text{O}_2\text{S}$   $[\text{M}+\text{Na}]^+$ : 607.1905 found: 607.1900.

2-(3-(3-chloro-4-fluorophenyl)thioureido)-*N*-(1-((3,5-dimethylphenyl)amino)-1-oxo-3-phenylpropan-2-yl)-3-phenylpropanamide (**I-18**). Yield 87.2%. Mp 142.0–149.5 °C.  $[\alpha_D]^{20} = -30.5$  (*c* 0.1, AcOEt).  $^1\text{H}$  NMR (500 MHz,  $\text{DMSO}-d_6$ )  $\delta$  9.93 (d,  $J = 11.2$  Hz, 2H), 8.66 (d,  $J = 8.0$  Hz, 1H), 7.82–7.77 (m, 1H), 7.73 (d,  $J = 7.5$  Hz, 1H), 7.33 (t,  $J = 8.0$  Hz, 3H), 7.28 (d,  $J = 7.4$  Hz, 1H), 7.27–7.22 (m, 4H), 7.20 (d,  $J = 7.2$  Hz, 1H), 7.16 (dd,  $J = 8.1, 3.9$  Hz, 5H), 6.72 (s, 1H), 5.13 (dd,  $J = 12.1, 6.9$  Hz, 1H), 4.73 (td,  $J = 8.6, 5.6$  Hz, 1H), 3.24 (dd,  $J = 13.8, 4.6$  Hz, 1H), 3.09 (dd,  $J = 13.8, 5.3$  Hz, 1H), 2.96 (dt,  $J = 13.7, 9.2$  Hz, 2H), 2.25 (s, 6H, 2×CH<sub>3</sub>).  $^{13}\text{C}$  NMR (125 MHz,  $\text{DMSO}-d_6$ )  $\delta$  179.9, 170.4, 169.6, 154.8, 152., 138.6, 137.7, 137.5, 136.9, 136.5, 129.5, 129.2, 128.2, 128.1, 126.4, 126.3, 125.1, 124.5, 123.4, 123.3, 118.9, 118.7, 117.2, 116.7, 116.5, 57.7,

54.8, 37.7, 37.4, 21.1. ESI-HRMS  $m/z$  calcd for  $C_{33}H_{32}ClFN_4O_2S$   $[M+Na]^+$ : 625.1811 found: 625.1805.

*2-(3-(3-chlorophenyl)thioureido)-N-(1-oxo-3-phenyl-1-((3-(trifluoromethyl)phenyl)amino)propan-2-yl)-3-phenylpropanamide (I-19)*. Yield 85.2%. Mp 144.8–153.5 °C.  $[\alpha_D]^{20} = -40.1$  (c 0.1, AcOEt).  $^1H$  NMR (500 MHz,  $CDCl_3$ )  $\delta$  8.93 (s, 1H), 8.62 (s, 1H), 7.68 (s, 1H), 7.58 (d,  $J = 8.1$  Hz, 1H), 7.34 (d,  $J = 7.8$  Hz, 1H), 7.26 (dd,  $J = 9.2, 6.7$  Hz, 1H), 7.21–7.18 (m, 2H), 7.15 (s, 1H), 7.09 (s, 5H), 7.05–7.00 (m, 2H), 6.99–6.95 (m, 3H), 6.93 (d,  $J = 7.1$  Hz, 2H), 5.28 (d,  $J = 6.1$  Hz, 1H), 5.05–4.83 (m, 1H), 3.11 (ddd,  $J = 21.4, 13.8, 8.0$  Hz, 2H), 2.95 (d,  $J = 5.6$  Hz, 2H).  $^{13}C$  NMR (125 MHz,  $CDCl_3$ )  $\delta$  180.2, 171.1, 170.2, 138.1, 137.5, 135.8, 135.4, 135.0, 131.6, 131.3, 130.5, 129.7, 129.5, 129.4, 128.9, 128.7, 127.5, 127.3, 127.0, 125.0, 124.9, 124.0, 123.2, 122.7, 121.8, 117.7, 59.4, 55.6, 38.5, 37.9. ESI-HRMS  $m/z$  calcd for  $C_{32}H_{28}ClF_3N_4O_2S$   $[M+Na]^+$ : 647.1466 found: 647.1458.

*N-(4-bromophenyl)-2-(2-(3-(3-bromophenyl)thioureido)-3-methylbutanamido)-3-methylpentanamide (I-20)*. Yield 88.2%. Mp 126.7–131.1 °C.  $[\alpha_D]^{20} = -26.9$  (c 0.1, AcOEt).  $^1H$  NMR (400 MHz,  $DMSO-d_6$ )  $\delta$  10.21 (s, 1H), 9.88 (s, 1H), 8.25 (d,  $J = 7.9$  Hz, 1H), 7.84 (d,  $J = 8.0$  Hz, 1H), 7.62–7.29 (m, 8H), 4.94 (s, 1H), 4.28 (t,  $J = 8.0$  Hz, 1H), 2.12 (dd,  $J = 12.7, 6.4$  Hz, 1H), 1.81 (d,  $J = 5.4$  Hz, 1H), 1.54 (s, 1H), 1.24–1.06 (m, 1H), 0.85 (dd,  $J = 16.8, 6.6$  Hz, 12H,  $4 \times CH_3$ ).  $^{13}C$  NMR (100 MHz,  $DMSO-d_6$ )  $\delta$  180.4, 170.7, 170.3, 139.1, 138.2, 131.6, 131.5, 131.2, 131.1, 124.2, 121.2, 115.6, 114.9, 61.2, 58.1, 36.2, 31.2, 24.6, 18.9, 18.2, 15.3, 10.9. ESI-HRMS  $m/z$  calcd for  $C_{24}H_{30}Br_2N_4O_2S$   $[M+K]^+$ : 635.0088 found: 635.0080.

*N-(4-bromophenyl)-2-(2-(3-(3,4-dichlorophenyl)thioureido)-3-methylbutanamido)-3-methylpentanamide (I-21)*. Yield 88.3%. Mp 126.7–131.1 °C.  $[\alpha_D]^{20} = -36.8$  (c 0.1, AcOEt).  $^1H$  NMR (400 MHz,  $DMSO-d_6$ )  $\delta$  10.21 (s, 1H), 10.01 (s, 1H), 8.27 (d,  $J = 8.2$  Hz, 1H), 8.16 (d,  $J = 2.0$  Hz, 1H), 7.98 (d,  $J = 8.3$  Hz, 1H), 7.61–7.55 (m, 2H), 7.53 (d,  $J = 8.8$  Hz, 1H), 7.48 (d,  $J = 8.9$  Hz, 2H), 7.43 (dd,  $J = 8.8, 2.5$  Hz, 1H), 5.03–4.81 (m, 1H), 4.29 (t,  $J = 8.2$  Hz, 1H), 2.13 (dd,  $J = 12.9, 6.6$  Hz, 1H), 1.81 (dd,  $J = 14.2, 6.2$  Hz, 1H), 1.62–1.45 (m, 1H), 1.32–1.01 (m, 1H), 0.95–0.40 (m, 12H,  $4 \times CH_3$ ).  $^{13}C$  NMR (100 MHz,  $DMSO-d_6$ )  $\delta$  180.3, 170.6, 170.3, 139.9, 138.2, 131.6, 130.4, 130.2, 125.1, 123.1, 122.0, 121.2, 114.9, 61.3, 58.1, 36.3, 31.2, 24.6, 18.9, 18.2, 15.3, 10.9. ESI-HRMS  $m/z$  calcd for  $C_{24}H_{29}BrCl_2N_4O_2S$   $[M+Na]^+$ : 609.0464 found: 609.0459.

*N-(4-bromophenyl)-2-(2-(3-(2-fluorophenyl)thioureido)-3-methylbutanamido)-3-methylpentanamide (I-22)*. Yield 83.2%. Mp 118.4–126.5 °C.  $[\alpha_D]^{20} = -30.5$  (c 0.1, AcOEt).  $^1H$  NMR (400 MHz,  $DMSO-d_6$ )  $\delta$  10.15 (s, 1H), 9.73 (s, 1H), 8.17 (d,  $J = 8.1$  Hz, 1H), 7.70 (dd,  $J = 26.2, 7.4$  Hz, 1H), 7.57–7.51 (m, 2H), 7.51–7.44 (m, 3H), 7.43 (s, 1H), 7.10 (t,  $J = 8.8$  Hz, 2H), 4.90 (d,  $J = 5.8$  Hz, 1H), 4.23 (t,  $J = 8.1$  Hz, 1H), 2.08 (dd,  $J = 12.9, 6.6$  Hz, 1H), 1.77 (dd,  $J = 14.5, 6.2$  Hz, 1H), 1.50 (ddd,  $J = 13.0, 7.4, 3.1$  Hz, 1H), 1.12 (dd,  $J = 14.6, 7.5$  Hz, 1H), 0.90–0.71 (m, 12H,  $4 \times CH_3$ ).  $^{13}C$  NMR (100 MHz,  $DMSO-d_6$ )  $\delta$  180.9, 170.9, 170.4, 160.0, 157.6, 138.2, 135.8, 131.6, 125.1, 125.0, 121.2, 115.2, 115.0, 61.4, 58.2, 36.3, 31.2, 24.6, 18.9, 18.2, 15.3, 10.9. ESI-HRMS  $m/z$  calcd for  $C_{24}H_{30}BrFN_4O_2S$   $[M+Na]^+$ : 559.1149 found: 559.1145.

*N*-(4-bromophenyl)-2-(2-(3-(4-fluorophenyl)thioureido)-3-methylbutanamido)-3-methylpentanamide (**I-23**). Yield 85.5%. Mp 131.8–139.2 °C.  $[\alpha_D]^{20} = -24.3$  (*c* 0.1, AcOEt). <sup>1</sup>H NMR (400 MHz, DMSO-*d*<sub>6</sub>)  $\delta$  10.19 (s, 1H), 9.76 (s, 1H), 8.22 (d, *J* = 8.1 Hz, 1H), 7.71 (d, *J* = 8.3 Hz, 1H), 7.61–7.55 (m, 2H), 7.60–7.53 (m, 3H), 7.47 (s, 1H), 7.14 (ddd, *J* = 12.6, 5.4, 3.0 Hz, 2H), 5.01–4.87 (m, 1H), 4.26 (d, *J* = 8.1 Hz, 1H), 2.12 (dq, *J* = 13.4, 6.7 Hz, 1H), 1.81 (dd, *J* = 14.4, 6.3 Hz, 1H), 1.54 (ddd, *J* = 13.1, 7.4, 3.1 Hz, 1H), 1.25–1.11 (m, 1H), 0.91–0.82 (m, 12H, 4×CH<sub>3</sub>). <sup>13</sup>C NMR (100 MHz, DMSO-*d*<sub>6</sub>)  $\delta$  180.9, 170.8, 170.3, 159.9, 157.6, 138.2, 135.8, 131.6, 125.0, 124.9, 121.2, 115.1, 114.9, 61.3, 58.1, 36.2, 31.2, 24.6, 18.9, 18.2, 15.3, 14.9, 11.5, 10.9. ESI-HRMS *m/z* calcd for C<sub>24</sub>H<sub>30</sub>BrFN<sub>4</sub>O<sub>2</sub>S [M+Na]<sup>+</sup>: 559.1149 found: 559.1144.

*N*-(3-chloro-4-fluorophenyl)-3-methyl-2-(3-methyl-2-(3-(naphthalen-2-yl)thioureido)butanamido)pentanamide (**I-24**). Yield 81.7%. Mp 116.3–124.2 °C.  $[\alpha_D]^{20} = -20.4$  (*c* 0.1, AcOEt). <sup>1</sup>H NMR (400 MHz, DMSO-*d*<sub>6</sub>)  $\delta$  10.29 (s, 1H), 9.85 (s, 1H), 8.24 (d, *J* = 7.8 Hz, 1H), 7.94 (dt, *J* = 8.4, 5.7 Hz, 3H), 7.84 (d, *J* = 8.2 Hz, 1H), 7.68 (d, *J* = 7.9 Hz, 1H), 7.60 (d, *J* = 7.1 Hz, 1H), 7.57–7.43 (m, 4H), 7.36 (t, *J* = 9.1 Hz, 1H), 5.07–4.86 (m, 1H), 4.24 (t, *J* = 7.8 Hz, 1H), 2.15 (dd, *J* = 12.8, 6.4 Hz, 1H), 1.82 (d, *J* = 6.5 Hz, 1H), 1.61–1.47 (m, 1H), 1.20 (dd, *J* = 13.6, 6.7 Hz, 1H), 0.96–0.59 (m, 12H, 4×CH<sub>3</sub>). <sup>13</sup>C NMR (100 MHz, DMSO-*d*<sub>6</sub>)  $\delta$  183.0, 171.5, 171.0, 154.9, 152.6, 136.7, 134.5, 130.3, 128.8, 127.1, 126.8, 126.2, 125.6, 123.3, 121.1, 120.1, 119.7, 117.7, 117.5, 62.3, 58.8, 36.8, 31.8, 25.2, 19.6, 18.8, 15.9, 11.5. ESI-HRMS *m/z* calcd for C<sub>28</sub>H<sub>32</sub>ClFN<sub>4</sub>O<sub>2</sub>S [M+Na]<sup>+</sup>: 565.1811 found: 565.1808.

*N*-(3-chloro-4-fluorophenyl)-2-(2-(3-(3,4-dichlorophenyl)thioureido)-3-methylbutanamido)-3-methylpentanamide (**I-25**). Yield 80.5%. Mp 129.5–133.2 °C.  $[\alpha_D]^{20} = -21.8$  (*c* 0.1, AcOEt). <sup>1</sup>H NMR (400 MHz, DMSO-*d*<sub>6</sub>)  $\delta$  10.31 (s, 1H), 10.01 (s, 1H), 8.28 (d, *J* = 8.0 Hz, 1H), 8.16 (s, 1H), 7.98 (d, *J* = 8.2 Hz, 1H), 7.92 (dd, *J* = 6.8, 2.3 Hz, 1H), 7.53 (d, *J* = 8.7 Hz, 1H), 7.50–7.45 (m, 1H), 7.43 (dd, *J* = 8.8, 2.3 Hz, 1H), 7.35 (t, *J* = 9.1 Hz, 1H), 5.04–4.73 (m, 1H), 4.26 (t, *J* = 8.1 Hz, 1H), 2.13 (dd, *J* = 12.8, 6.5 Hz, 1H), 1.82 (d, *J* = 6.2 Hz, 1H), 1.53 (d, *J* = 7.2 Hz, 1H), 1.20–1.12 (m, 1H), 0.87 (dd, *J* = 15.8, 8.4 Hz, 12H, 4×CH<sub>3</sub>). <sup>13</sup>C NMR (100 MHz, DMSO-*d*<sub>6</sub>)  $\delta$  180.7, 171.1, 170.8, 154.8, 152.4, 140.4, 136.4, 130.8, 130.6, 125.5, 123.5, 122.4, 120.9, 117.5, 117.3, 61.7, 58.5, 36.6, 31.6, 25.0, 19.3, 18.6, 15.7, 11.2. ESI-HRMS *m/z* calcd for C<sub>24</sub>H<sub>28</sub>Cl<sub>3</sub>FN<sub>4</sub>O<sub>2</sub>S [M+Na]<sup>+</sup>: 583.0875 found: 583.0870.

*N*-(3-chloro-4-fluorophenyl)-2-(2-(3-(3-chloro-4-methylphenyl)thioureido)-3-methylbutanamido)-3-methylpentanamide (**I-26**). Yield 84.6%. Mp 132.8–137.5 °C.  $[\alpha_D]^{20} = -19.7$  (*c* 0.1, AcOEt). <sup>1</sup>H NMR (400 MHz, DMSO-*d*<sub>6</sub>)  $\delta$  10.31 (s, 1H), 9.84 (s, 1H), 8.27 (d, *J* = 8.0 Hz, 1H), 7.93 (dd, *J* = 6.9, 2.5 Hz, 1H), 7.85 (s, 1H), 7.81 (d, *J* = 8.4 Hz, 1H), 7.48 (ddd, *J* = 9.0, 4.3, 2.6 Hz, 1H), 7.36 (t, *J* = 9.1 Hz, 1H), 7.26 (d, *J* = 0.9 Hz, 2H), 5.10–4.75 (m, 1H), 4.26 (t, *J* = 8.1 Hz, 1H), 2.28 (s, 3H, CH<sub>3</sub>), 2.13 (dd, *J* = 12.9, 6.6 Hz, 1H), 1.82 (dd, *J* = 14.6, 6.1 Hz, 1H), 1.55 (ddd, *J* = 13.1, 7.5, 3.1 Hz, 1H), 1.25–1.08 (m, 1H), 0.93–0.50 (m, 12H, 4×CH<sub>3</sub>). <sup>13</sup>C NMR (100 MHz, DMSO-*d*<sub>6</sub>)  $\delta$  180.5, 170.8, 170.4, 154.3, 151.9, 138.8, 136.0, 132.5, 130.8, 122.4, 121.1,



120.5, 117.1, 116.9, 61.2, 58.1, 36.2, 31.2, 24.6, 19.0, 18.9, 18.2, 15.3, 10.8. ESI-HRMS  $m/z$  calcd for  $C_{25}H_{31}Cl_2FN_4O_2S$   $[M+Na]^+$ : 563.1421 found: 563.1418.

*N*-(3-chloro-4-fluorophenyl)-2-(2-(3-(4-methoxyphenyl)thioureido)-3-methylbutanamido)-3-methylpentanamide (**I-27**). Yield 85.8%. Mp 125.2–132.5 °C.  $[\alpha_D]^{20} = -20.6$  ( $c$  0.1, AcOEt).  $^1H$  NMR (400 MHz,  $CDCl_3$ )  $\delta$  9.37 (s, 1H), 8.50 (s, 1H), 8.22 (s, 1H), 7.56 (dd,  $J = 6.4, 2.0$  Hz, 1H), 7.32 (dd,  $J = 5.2, 3.1$  Hz, 1H), 7.13 (d,  $J = 8.8$  Hz, 3H), 6.87 (t,  $J = 8.7$  Hz, 1H), 6.81 (d,  $J = 8.9$  Hz, 2H), 5.10 (s, 1H), 4.52 (t,  $J = 8.3$  Hz, 1H), 3.76 (s, 3H), 2.16–2.06 (m, 1H), 1.98 (d,  $J = 8.3$  Hz, 1H), 1.63 (dd,  $J = 10.8, 7.4$  Hz, 1H), 1.22–1.05 (m, 1H), 0.95 (d,  $J = 6.5$  Hz, 3H), 0.89 (d,  $J = 6.3$  Hz, 6H,  $2 \times CH_3$ ), 0.78 (t,  $J = 7.2$  Hz, 3H).  $^{13}C$  NMR (100 MHz,  $CDCl_3$ )  $\delta$  181.2, 172.5, 171.1, 156.2, 153.8, 134.1, 134.1, 127.0, 122.5, 121.1, 120.9, 120.1, 120.0, 116.7, 116.4, 114.7, 63.3, 59.6, 55.5, 36.4, 25.5, 19.1, 18.9, 15.7, 11.0. ESI-HRMS  $m/z$  calcd for  $C_{25}H_{32}ClFN_4O_3S$   $[M+Na]^+$ : 545.1760 found: 545.1758.

*l*-(1-(1-(2,5-dimethoxyphenylamino)-3-methyl-1-oxopentan-2-ylamino)-3-methyl-1-oxobutan-2-yl)-3-(3-nitrophenyl)thiourea (**I-28**). Yield 96.5%. Mp 128.4–133.6 °C.  $[\alpha_D]^{20} = -25.5$  ( $c$  0.1, AcOEt).  $^1H$  NMR (400 MHz,  $DMSO-d_6$ )  $\delta$  10.21 (s, 1H), 9.00 (s, 1H), 8.86 (s, 1H), 8.37 (d,  $J = 8.1$  Hz, 1H), 8.08 (d,  $J = 8.3$  Hz, 1H), 7.91 (dd,  $J = 8.2, 1.5$  Hz, 1H), 7.85 (d,  $J = 8.1$  Hz, 1H), 7.73 (d,  $J = 2.6$  Hz, 1H), 7.58 (t,  $J = 8.2$  Hz, 1H), 6.95 (d,  $J = 9.0$  Hz, 1H), 6.62 (dd,  $J = 8.9, 3.0$  Hz, 1H), 5.05–4.95 (m, 1H), 4.43 (t,  $J = 7.7$  Hz, 1H), 3.77 (s, 3H), 3.68 (s, 3H), 2.22 (d,  $J = 6.5$  Hz, 1H), 1.91 (d,  $J = 6.0$  Hz, 1H), 1.56–1.47 and 1.22 (m, 1H; s, 1H), 0.95 (d,  $J = 6.8$  Hz, 3H), 0.92–0.88 (m, 6H,  $2 \times CH_3$ ), 0.85 (t,  $J = 7.3$  Hz, 3H,  $CH_3$ ).  $^{13}C$  NMR (100 MHz,  $DMSO-d_6$ )  $\delta$  180.5, 171.0, 169.9, 153.0, 147.5, 143.3, 141.1, 129.6, 127.8, 127.8, 117.9, 115.9, 111.8, 107.9, 107.6, 61.3, 58.1, 56.2, 55.3, 36.1, 31.1, 24.4, 19.0, 17.9, 15.4, 11.0. ESI-HRMS  $m/z$  calcd for  $C_{26}H_{35}N_5O_6S$   $[M-H]^-$ : 544.2235 found: 544.2236.

*l*-(1-(1-(3-chloro-4-methylphenylamino)-3-methyl-1-oxopentan-2-ylamino)-3-methyl-1-oxobutan-2-yl)-3-(3-nitrophenyl)thiourea (**I-29**). Yield 74.5%. Mp 183.4–188.6 °C.  $[\alpha_D]^{20} = -28.2$  ( $c$  0.1, AcOEt).  $^1H$  NMR (400 MHz,  $DMSO-d_6$ )  $\delta$  10.21 (s, 1H), 10.14 (s, 1H), 8.85 (s, 1H), 8.24 (d,  $J = 8.1$  Hz, 1H), 8.05 (d,  $J = 8.2$  Hz, 1H), 7.90 (dd,  $J = 8.1, 1.5$  Hz, 1H), 7.85 (d,  $J = 8.0$  Hz, 1H), 7.79 (d,  $J = 1.8$  Hz, 1H), 7.57 (t,  $J = 8.1$  Hz, 1H), 7.37–7.34 (m, 1H), 7.25 (d,  $J = 8.3$  Hz, 1H), 5.00–4.92 (m, 1H), 4.29 (t,  $J = 8.1$  Hz, 1H), 2.25 (s, 3H), 2.16 (dd,  $J = 12.9, 6.6$  Hz, 1H), 1.82 (d,  $J = 6.1$  Hz, 1H), 1.54 and 1.22–1.17 (d,  $J = 7.4$  Hz, 1H; m, 1H), 0.93–0.88 (m, 6H,  $2 \times CH_3$ ), 0.87 (s, 3H,  $CH_3$ ), 0.84 (d,  $J = 7.1$  Hz, 3H,  $CH_3$ ).  $^{13}C$  NMR (100 MHz,  $DMSO-d_6$ )  $\delta$  180.5, 170.5, 170.2, 147.5, 141.1, 137.9, 133.0, 131.1, 130.0, 129.6, 127.8, 119.2, 117.9, 115.8, 61.3, 58.1, 36.3, 31.1, 29.8, 24.6, 18.9, 18.9, 18.1, 15.3, 10.8. ESI-HRMS  $m/z$  calcd for  $C_{25}H_{32}ClN_5O_4S$   $[M-H]^-$ : 532.1791 found: 532.1795.

*N*-(1-((3-chlorophenyl)amino)-3-methyl-1-oxobutan-2-yl)-3-methyl-2-(3-(3,4,5-trimethylphenyl)thioureido)pentanamide (**I-30**). Yield 83.6%. Mp 148.6–152.3 °C.  $[\alpha_D]^{20} = -11.7$

(*c* 0.1, AcOEt). <sup>1</sup>H NMR (400 MHz, CDCl<sub>3</sub>) δ 8.72 (s, 1H), 8.26 (s, 1H), 7.59 (t, *J* = 1.8 Hz, 1H), 7.45 (s, 1H), 7.34 (d, *J* = 8.2 Hz, 1H), 7.13 (t, *J* = 8.1 Hz, 1H), 7.07–6.98 (m, 2H), 6.50 (s, 2H), 5.01 (t, *J* = 7.7 Hz, 1H), 4.43 (t, *J* = 8.0 Hz, 1H), 3.82 (s, 3H, CH<sub>3</sub>), 3.74 (s, 6H, 2×CH<sub>3</sub>), 2.31–2.11 (m, 1H), 1.95–1.89 (m, 1H), 1.60–1.51 (m, 1H), 1.17–1.06 (m, 1H), 0.99 (dd, *J* = 6.7, 2.9 Hz, 6H, 2×CH<sub>3</sub>), 0.91–0.74 (m, 6H, 2×CH<sub>3</sub>). <sup>13</sup>C NMR (100 MHz, CDCl<sub>3</sub>) δ 180.7, 172.1, 170.1, 153.9, 153.2, 138.6, 134.7, 130.1, 124.8, 120.3, 118.3, 103.6, 102.5, 63.1, 61.0, 60.2, 56.3, 56.2, 37.6, 30.5, 25.6, 19.5, 18.6, 15.4, 12.8, 11.4. ESI-HRMS *m/z* calcd for C<sub>27</sub>H<sub>37</sub>ClN<sub>4</sub>O<sub>2</sub>S [M+K]<sup>+</sup>: 555.1957 found: 555.2003.

*N*-(1-((3-chlorophenyl)amino)-3-methyl-1-oxobutan-2-yl)-2-(3-(3,4-dichlorophenyl)thioureido)-3-methylpentanamide (**I-31**). Yield 81.8%. Mp 129.4–135.6 °C. [ $\alpha_D$ ]<sup>20</sup> = -31.6 (*c* 0.1, AcOEt). <sup>1</sup>H NMR (400 MHz, DMSO-*d*<sub>6</sub>) δ 10.25 (s, 1H), 9.96 (s, 1H), 8.24 (d, *J* = 8.2 Hz, 1H), 8.15 (d, *J* = 2.1 Hz, 1H), 8.01 (d, *J* = 8.3 Hz, 1H), 7.82 (t, *J* = 2.0 Hz, 1H), 7.54 (d, *J* = 8.7 Hz, 1H), 7.48–7.40 (m, 2H), 7.34 (t, *J* = 8.1 Hz, 1H), 7.11 (dd, *J* = 7.9, 1.3 Hz, 1H), 4.92 (dd, *J* = 20.8, 13.4 Hz, 1H), 4.26 (t, *J* = 7.9 Hz, 1H), 2.05 (dd, *J* = 13.9, 6.9 Hz, 1H), 1.92–1.78 (m, 1H), 1.50 (ddd, *J* = 13.3, 7.5, 3.4 Hz, 1H), 1.15 (d, *J* = 7.5 Hz, 1H), 0.88 (ddd, *J* = 21.1, 15.2, 8.1 Hz, 12H, 4×CH<sub>3</sub>). <sup>13</sup>C NMR (100 MHz, DMSO-*d*<sub>6</sub>) δ 180.6, 171.2, 170.7, 140.6, 140.4, 133.5, 130.9, 130.8, 130.6, 125.5, 123.5, 122.4, 119.1, 118.0, 61.3, 59.6, 37.8, 30.7, 25.0, 19.6, 19.0, 15.6, 11.7. ESI-HRMS *m/z* calcd for C<sub>24</sub>H<sub>29</sub>Cl<sub>3</sub>N<sub>4</sub>O<sub>2</sub>S [M+Na]<sup>+</sup>: 565.0969 found: 565.0964.

*N*-(1-((3-chlorophenyl)amino)-3-methyl-1-oxobutan-2-yl)-2-(3-(4-fluoro-3-(trifluoromethyl)phenyl)thioureido)-3-methylpentanamide (**I-32**). Yield 86.8%. Mp 127.3–133.6 °C. [ $\alpha_D$ ]<sup>20</sup> = -33.4 (*c* 0.1, AcOEt). <sup>1</sup>H NMR (400 MHz, CDCl<sub>3</sub>) δ 9.30 (s, 1H), 8.93 (s, 2H), 7.99 (s, 1H), 7.66 (s, 1H), 7.55 (s, 1H), 7.48 (d, *J* = 7.0 Hz, 1H), 7.38 (d, *J* = 7.7 Hz, 1H), 7.31 (dd, *J* = 14.3, 6.7 Hz, 2H), 7.06 (d, *J* = 6.3 Hz, 2H), 5.27 (s, 1H), 4.67 (s, 1H), 2.25 (s, 1H), 1.89 (s, 1H), 1.65 (s, 1H), 1.26 (s, 1H), 1.10–0.97 (m, 6H, 2×CH<sub>3</sub>), 0.88 (d, *J* = 6.0 Hz, 3H, CH<sub>3</sub>), 0.79 (t, *J* = 7.1 Hz, 3H, CH<sub>3</sub>). <sup>13</sup>C NMR (100 MHz, CDCl<sub>3</sub>) δ 181.2, 172.9, 172.1, 139.2, 138.3, 135.1, 131.6, 131.3, 130.5, 129.6, 128.2, 125.8, 125.5, 122.8, 122.7, 121.5, 121.4, 119.3, 62.9, 61.1, 39.3, 26.2, 19.7, 19.5, 15.4, 12.1. ESI-HRMS *m/z* calcd for C<sub>25</sub>H<sub>29</sub>ClF<sub>4</sub>N<sub>4</sub>O<sub>2</sub>S [M+Na]<sup>+</sup>: 583.1528 found: 583.1329.

2-(3-(3,4-dimethylphenyl)thioureido)-3-methyl-*N*-(3-methyl-1-oxo-1-(*m*-tolylamino)butan-2-yl)pentanamide (**I-33**). Yield 90.7%. Mp 127.5–132.6 °C. [ $\alpha_D$ ]<sup>20</sup> = -19.8 (*c* 0.1, AcOEt). <sup>1</sup>H NMR (400 MHz, DMSO-*d*<sub>6</sub>) δ 9.91 (s, 1H), 9.62 (s, 1H), 8.11 (d, *J* = 8.3 Hz, 1H), 7.57 (d, *J* = 8.3 Hz, 1H), 7.44 (s, 1H), 7.37 (d, *J* = 8.2 Hz, 1H), 7.25–7.13 (m, 3H), 7.08 (d, *J* = 8.1 Hz, 1H), 6.87 (d, *J* = 7.5 Hz, 1H), 4.96 (t, *J* = 7.1 Hz, 1H), 4.27 (t, *J* = 7.8 Hz, 1H), 2.27 (s, 3H, CH<sub>3</sub>), 2.19 (d, *J* = 3.8 Hz, 6H, 2×CH<sub>3</sub>), 2.05 (dd, *J* = 13.8, 6.9 Hz, 1H), 1.90–1.80 (m, 1H), 1.56–1.44 (m, 1H), 1.15–1.05 (m, 1H), 0.93 (t, *J* = 6.6 Hz, 6H, 2×CH<sub>3</sub>), 0.90–0.81 (m, 6H, 2×CH<sub>3</sub>). <sup>13</sup>C NMR (100 MHz, DMSO-*d*<sub>6</sub>) δ 180.4, 170.9, 169.8, 138.7, 137.9, 136.8, 136.4, 132.3, 129.5, 128.6, 124.3, 124.0,

120.6, 119.7, 116.5, 60.9, 59.0, 37.4, 30.4, 24.6, 21.2, 19.5, 19.2 18.8, 18.6, 15.3, 11.3.ESI-HRMS  $m/z$  calcd for  $C_{27}H_{38}N_4O_2S$   $[M+Na]^+$ : 505.2608 found: 505.2606.

*2-(3-(3-methoxyphenyl)thioureido)-3-methyl-N-(3-methyl-1-oxo-1-(m-tolylamino)butan-2-yl)pentanamide (I-34)*. Yield 92.8%. Mp 126.6–131.8 °C.  $[\alpha_D]^{20} = -29.9$  ( $c$  0.1, AcOEt).  $^1H$  NMR (400 MHz,  $CDCl_3$ )  $\delta$  8.97 (s, 1H), 8.65 (s, 1H), 8.24 (s, 1H), 7.57 (s, 1H), 7.32 (s, 1H), 7.28 (d,  $J = 8.3$  Hz, 1H), 7.13 (t,  $J = 8.1$  Hz, 1H), 7.05 (t,  $J = 7.8$  Hz, 1H), 7.00 (s, 1H), 6.87 (d,  $J = 7.6$  Hz, 1H), 6.80 (d,  $J = 8.1$  Hz, 1H), 6.69 (dd,  $J = 8.4, 2.2$  Hz, 1H), 5.20 (t,  $J = 7.9$  Hz, 1H), 4.62 (t,  $J = 8.6$  Hz, 1H), 3.67 (s, 3H,  $OCH_3$ ), 2.25 (dd,  $J = 14.8, 6.9$  Hz, 1H), 2.13 (s, 3H,  $CH_3$ ), 1.97–1.84 (m, 1H), 1.68–1.47 (m, 1H), 1.18–1.06 (m, 1H), 1.02 (t,  $J = 6.7$  Hz, 6H,  $2 \times CH_3$ ), 0.88 (d,  $J = 6.7$  Hz, 3H,  $CH_3$ ), 0.80 (t,  $J = 7.3$  Hz, 3H,  $CH_3$ ).  $^{13}C$  NMR (100 MHz,  $CDCl_3$ )  $\delta$  180.5, 172.3, 170.9, 160.4, 139.1, 139.0, 137.4, 130.1, 129.0, 125.8, 121.4, 117.9, 116.7, 110.2, 62.8, 60.6, 55.5, 38.6, 30.8, 25.9, 21.5, 19.5, 19.2, 15.3, 11.8.ESI-HRMS  $m/z$  calcd for  $C_{26}H_{36}N_4O_3S$   $[M+Na]^+$ : 507.2400 found: 507.2399.

*2-(3-(4-chlorophenyl)thioureido)-3-methyl-N-(3-methyl-1-oxo-1-(m-tolylamino)butan-2-yl)pentanamide (I-35)*. Yield 89.0%. Mp 118.8–124.5 °C.  $[\alpha_D]^{20} = -31.3$  ( $c$  0.1, AcOEt).  $^1H$  NMR (400 MHz,  $CDCl_3$ )  $\delta$  9.22 (s, 1H), 8.96 (s, 2H), 8.06 (s, 1H), 7.45 (s, 1H), 7.30 (s, 2H), 7.19 (d,  $J = 7.7$  Hz, 1H), 7.09 (ddd,  $J = 23.8, 16.0, 7.8$  Hz, 3H), 6.90 (d,  $J = 7.9$  Hz, 1H), 5.32 (s, 1H), 4.74 (s, 1H), 2.29 (s, 1H), 2.10 (s, 3H,  $CH_3$ ), 1.92 (s, 1H), 1.67 (s, 1H), 1.10 (s, 1H), 1.12–1.01 (m, 6H,  $2 \times CH_3$ ), 0.89 (d,  $J = 5.9$  Hz, 3H,  $CH_3$ ), 0.80 (d,  $J = 7.1$  Hz, 3H,  $CH_3$ ).  $^{13}C$  NMR (100 MHz,  $CDCl_3$ )  $\delta$  180.7, 172.5, 171.6, 139.9, 139.2, 137.0, 134.3, 129.7, 129.1, 126.3, 125.6, 124.5, 122.7, 121.9, 118.5, 62.7, 60.8, 39.3, 30.8, 26.0, 21.5, 19.5, 19.4, 15.2, 12.1.ESI-HRMS  $m/z$  calcd for  $C_{25}H_{33}ClN_4O_2S$   $[M+Na]^+$ : 511.1905 found: 511.1905.

*1-(1-(1-(3,4-dimethylphenylamino)-3-methyl-1-oxobutan-2-ylamino)-3-methyl-1-oxopentan-2-yl)-3-(3-nitrophenyl)thiourea (I-36)*. Yield 80.4%. Mp 194.5–195.4 °C.  $[\alpha_D]^{20} = -22.7$  ( $c$  0.1, AcOEt).  $^1H$  NMR (500 MHz,  $DMSO-d_6$ )  $\delta$  10.17 (s, 1H), 9.83 (d,  $J = 20.0$  Hz, 1H), 8.85 (s, 1H), 8.14 (d,  $J = 8.5$  Hz, 1H), 8.09 (d,  $J = 8.4$  Hz, 1H), 7.90 (dd,  $J = 8.2, 1.5$  Hz, 1H), 7.83 (d,  $J = 7.4$  Hz, 1H), 7.57 (t,  $J = 8.2$  Hz, 1H), 7.35 (s, 1H), 7.29 (dd,  $J = 8.1, 1.9$  Hz, 1H), 7.03 (d,  $J = 8.2$  Hz, 1H), 4.95 (t,  $J = 7.4$  Hz, 1H), 4.27 (t,  $J = 8.0$  Hz, 1H), 2.15 (d,  $J = 10.6$  Hz, 6H), 2.04 (dd,  $J = 14.2, 7.1$  Hz, 1H), 1.92–1.87 (m, 1H), 1.55–1.50 and 1.16–1.10 (m, 1H; m, 1H), 0.95–0.87 (m, 9H,  $3 \times CH_3$ ), 0.85 (t,  $J = 7.4$  Hz, 3H,  $CH_3$ ).  $^{13}C$  NMR (125 MHz,  $DMSO-d_6$ )  $\delta$  180.4, 170.7, 169.55, 147.5, 141.1, 136.5, 136.3, 131.1, 129.7, 129.6, 127.9, 120.6, 118.0, 116.9, 115.9, 61.0, 59.0, 37.4, 30.5, 24.6, 19.6, 19.2, 18.8, 18.6, 15.3, 11.3. ESI-HRMS  $m/z$  calcd for  $C_{26}H_{35}N_5O_4S$   $[M-H]^-$ : 512.2337 found: 512.2338.

$^1H$  NMR,  $^{13}C$  NMR and HRMS of compounds **I-1–I-36**:

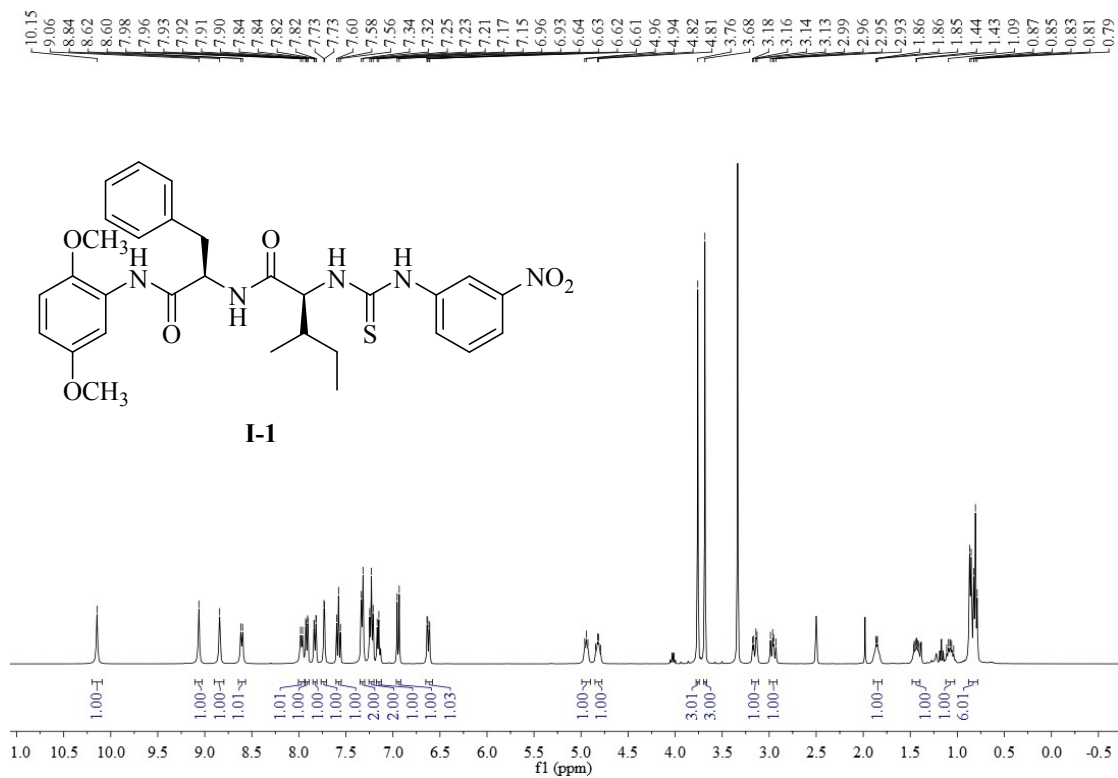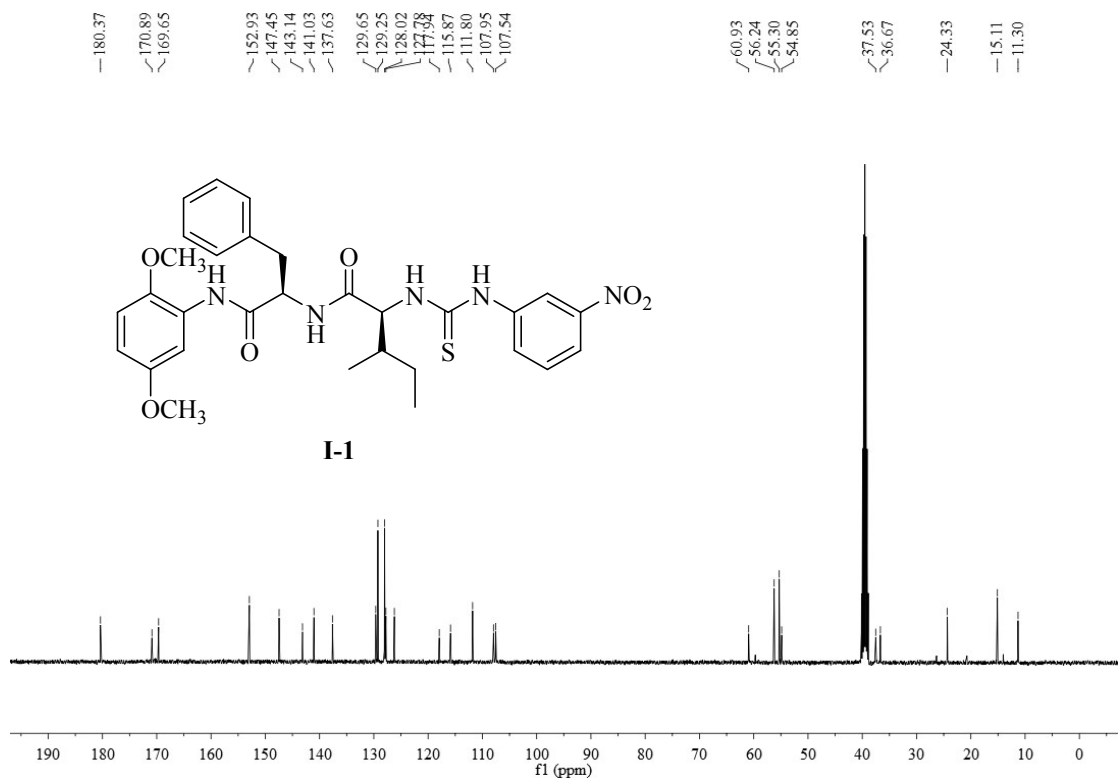

T: FTMS + p ESI sid=60.00 Full ms [580.00-610.00]

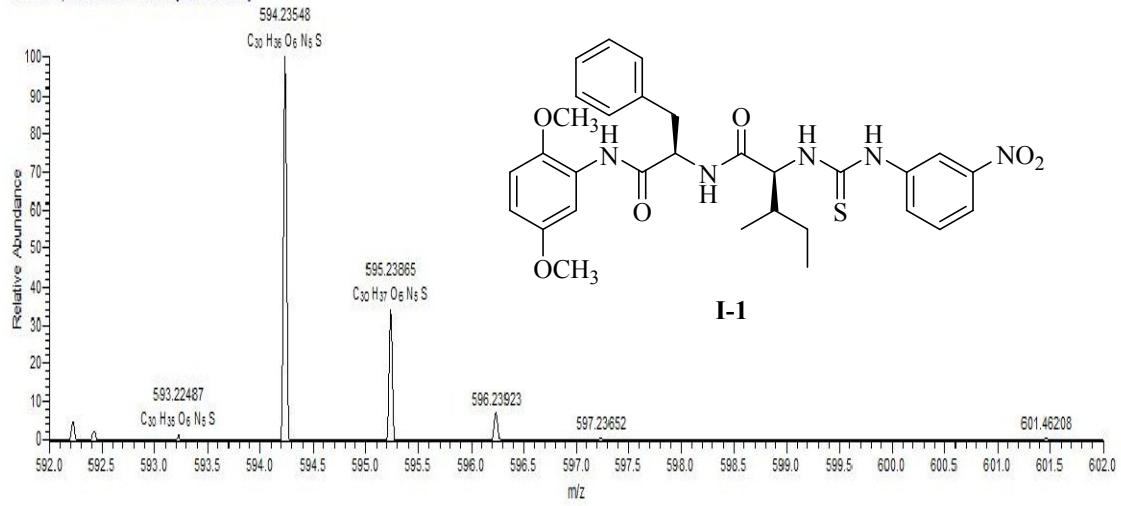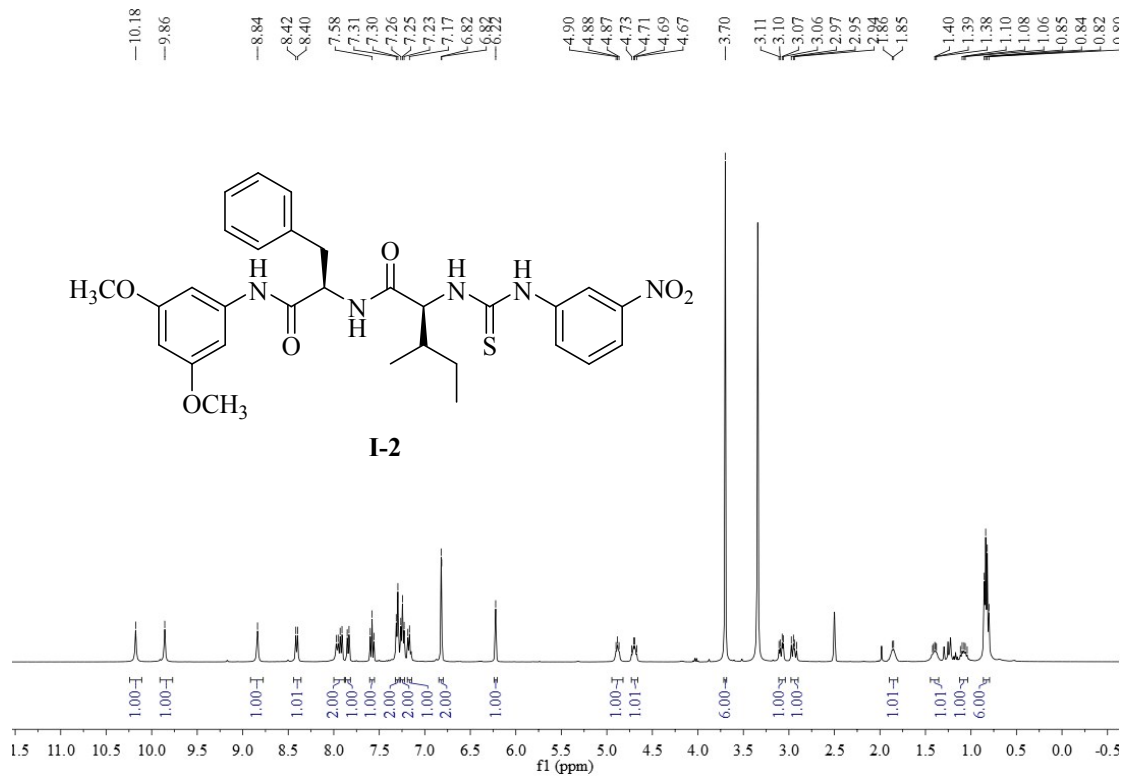

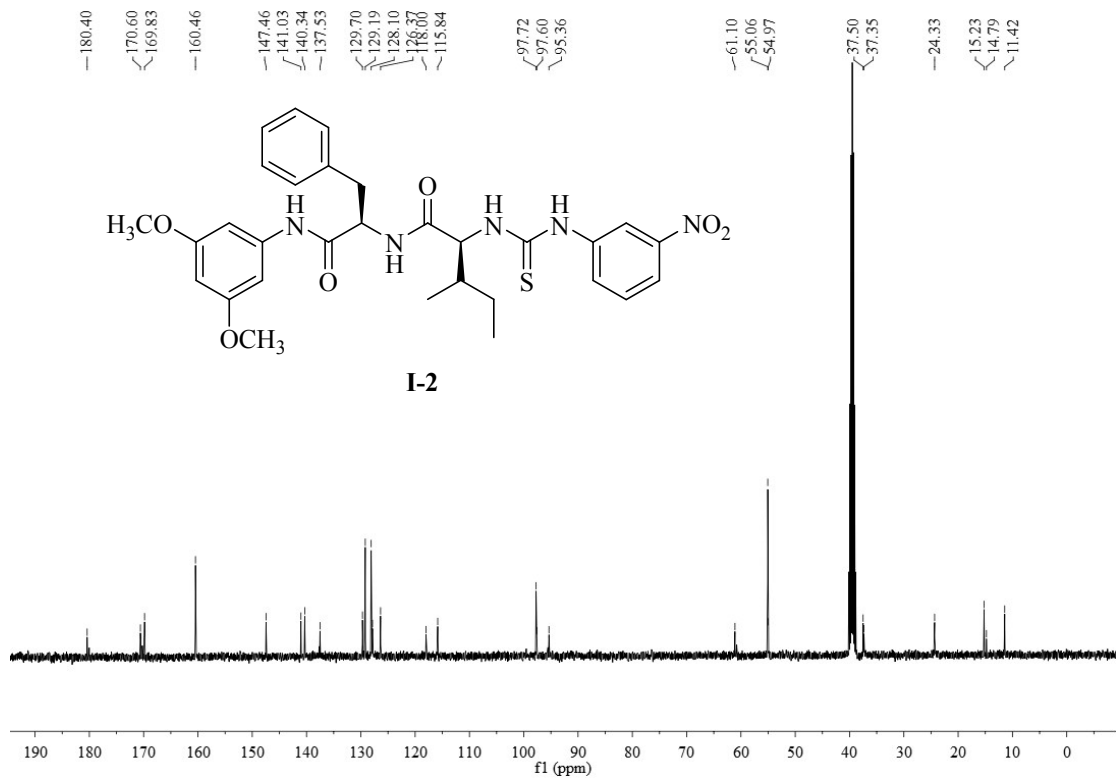

T: FTMS - p ESI Full ms [575.00-610.10]

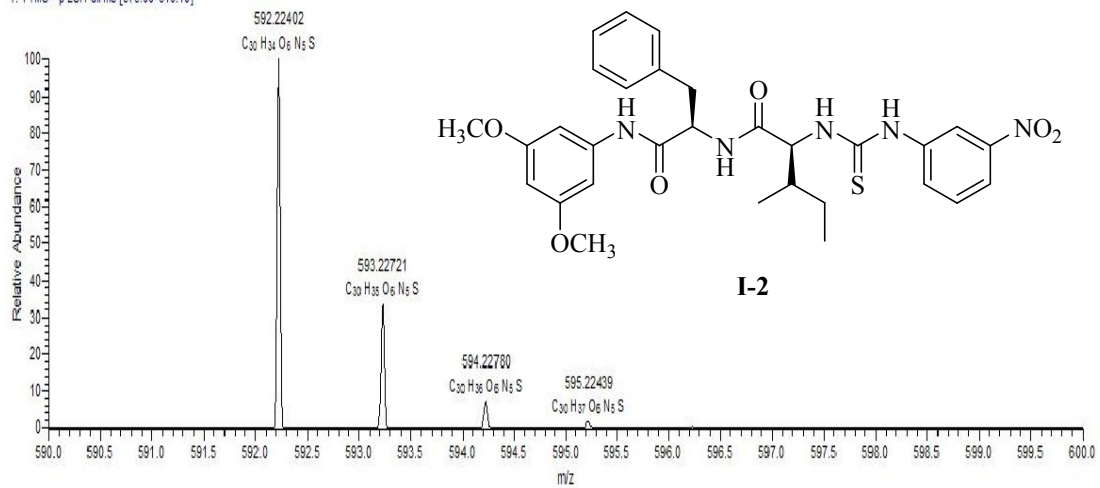

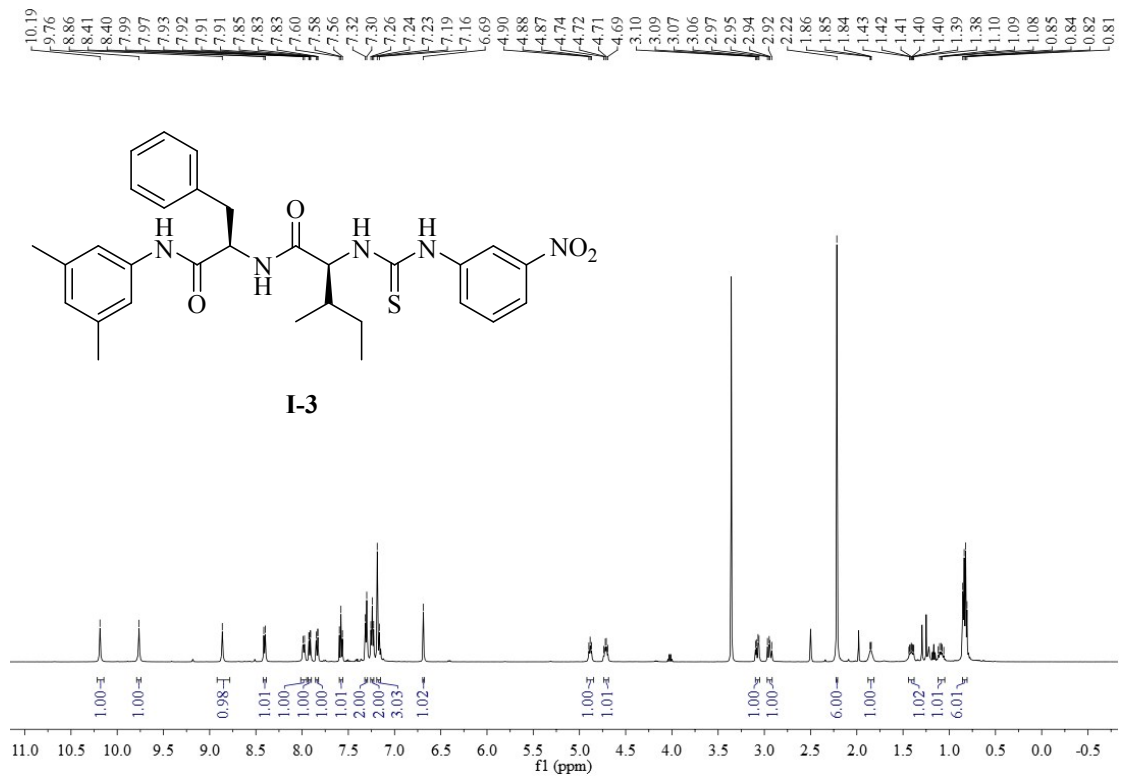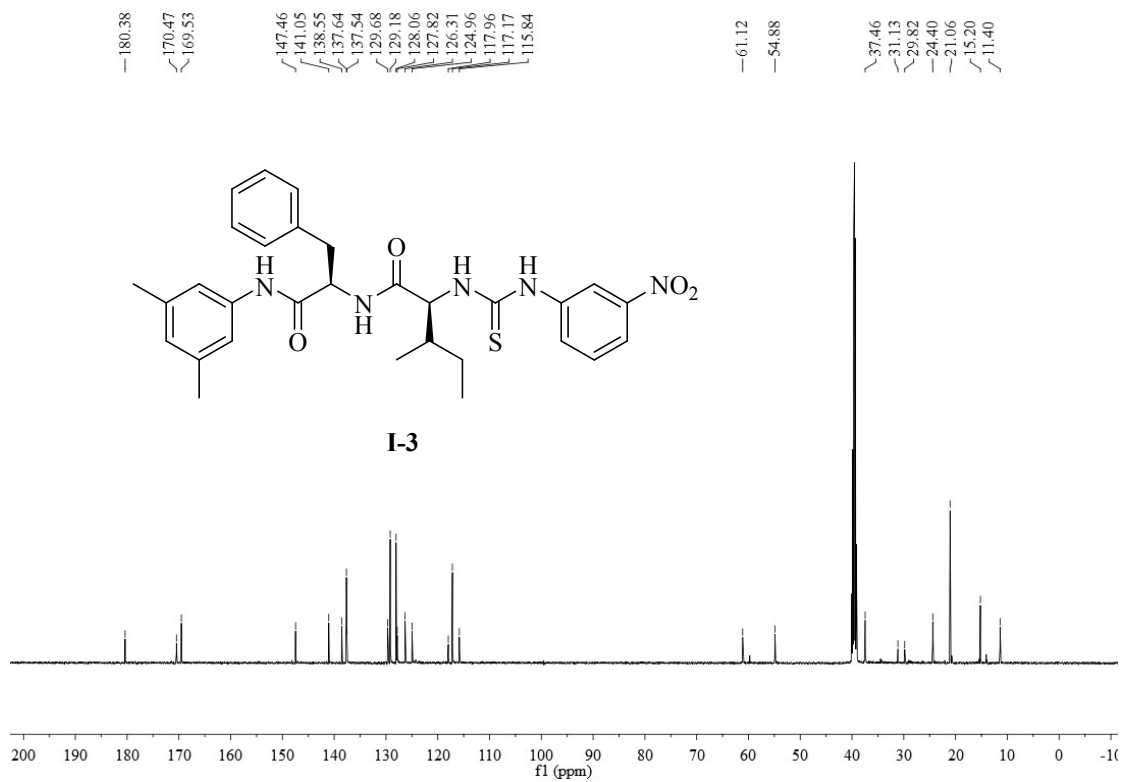

T: FTMS - p ESI Full ms [540.00-580.10]

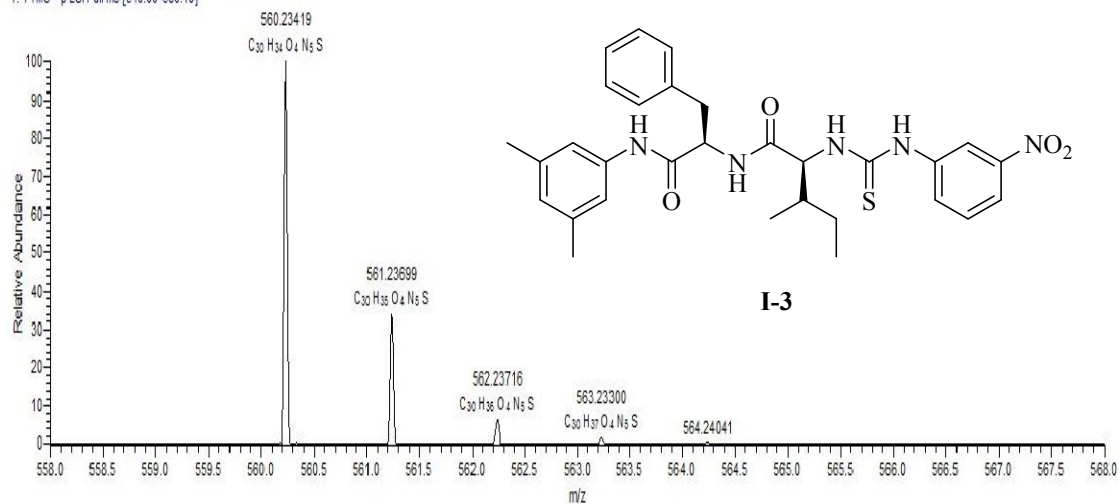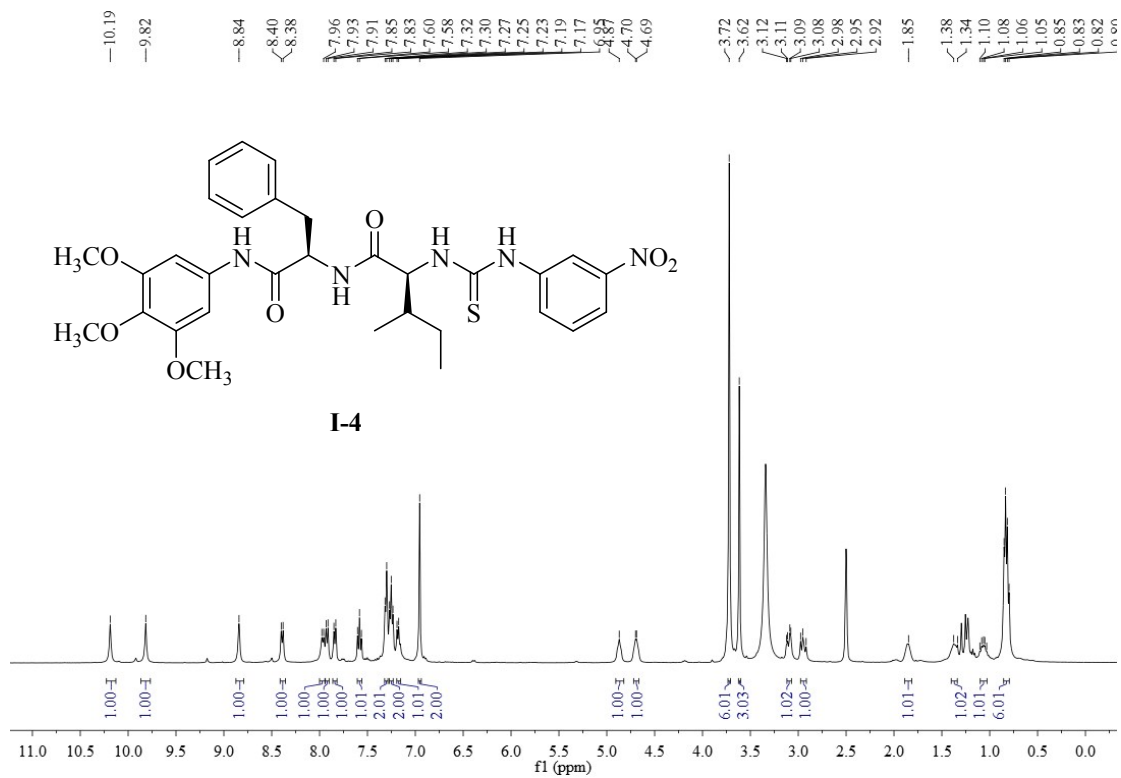



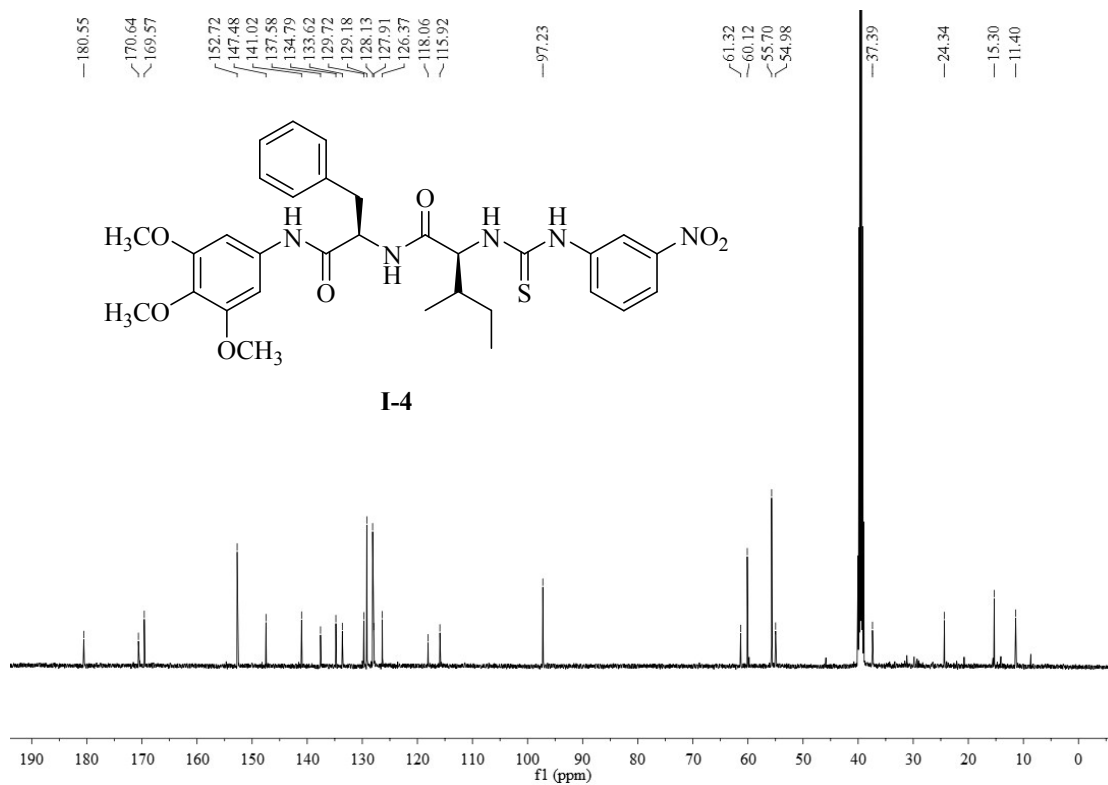

T: FTMS - p ESI Full ms [250.00-700.10]

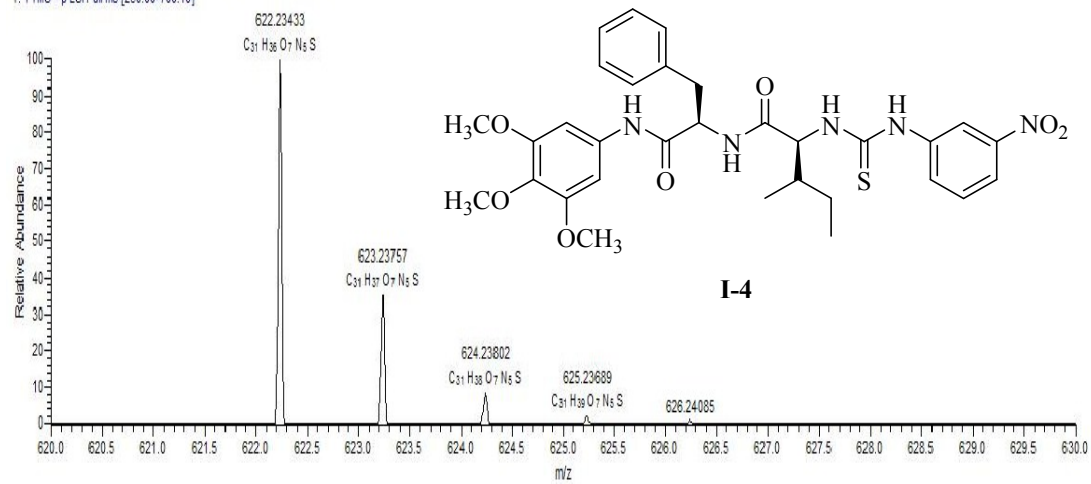

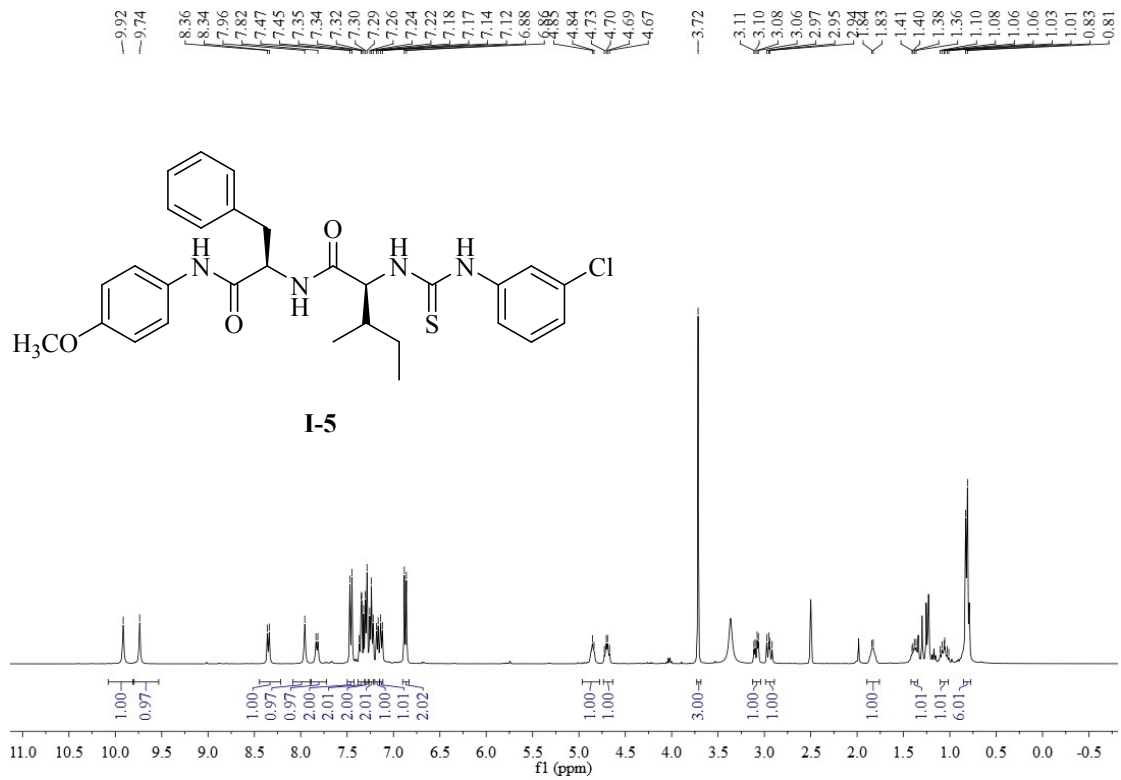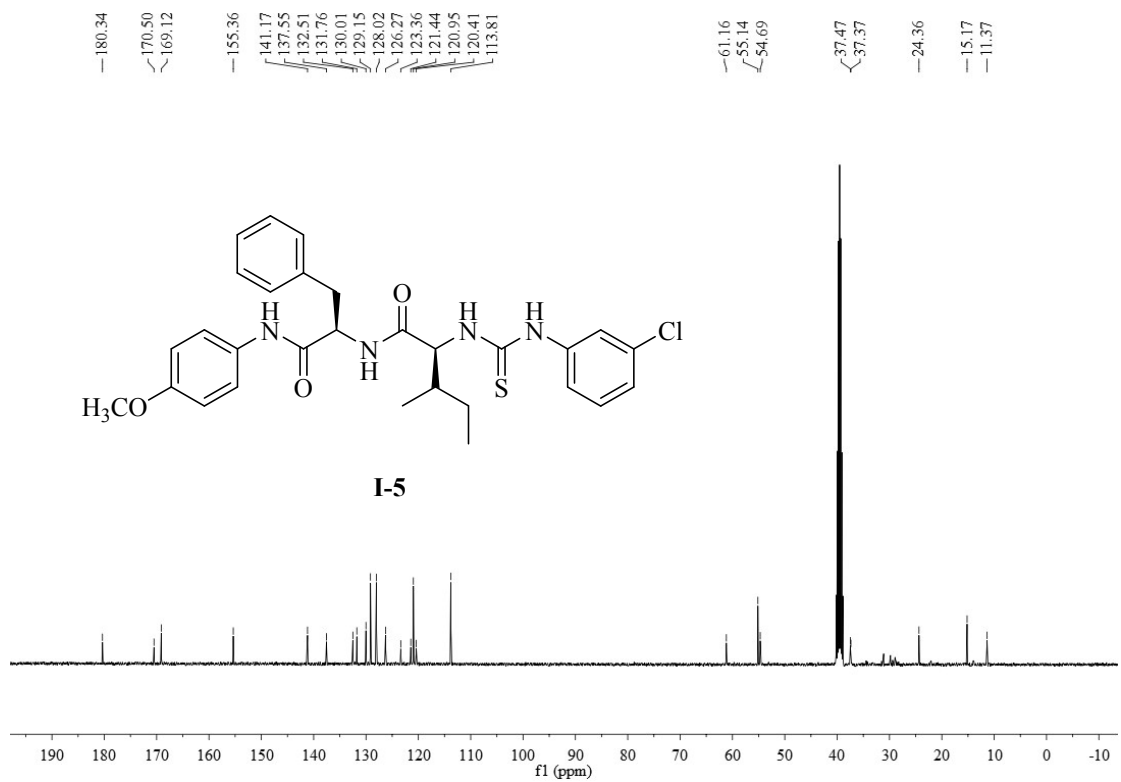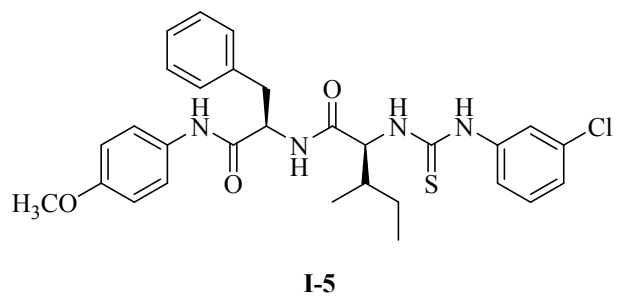

T: FTMS - p ESI Full ms [100.00-750.00]

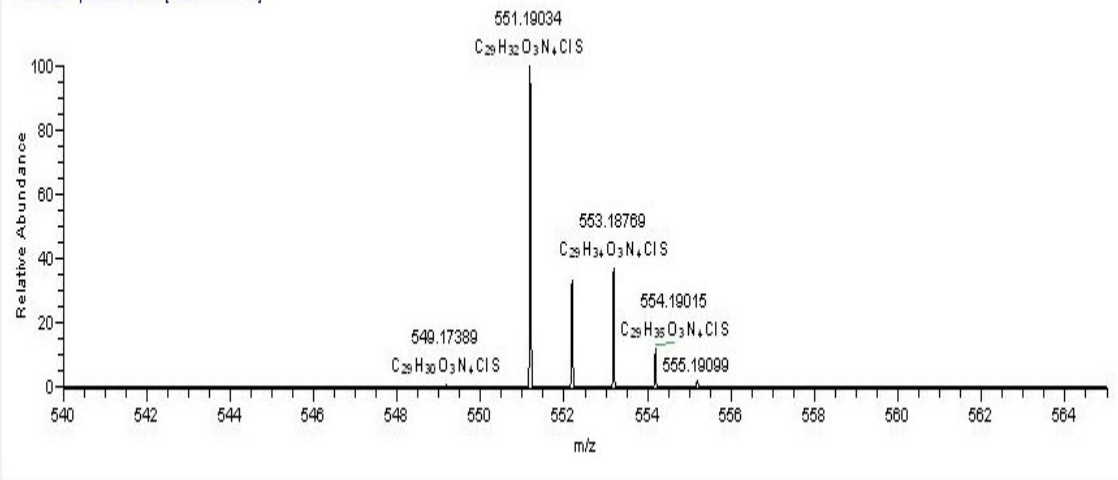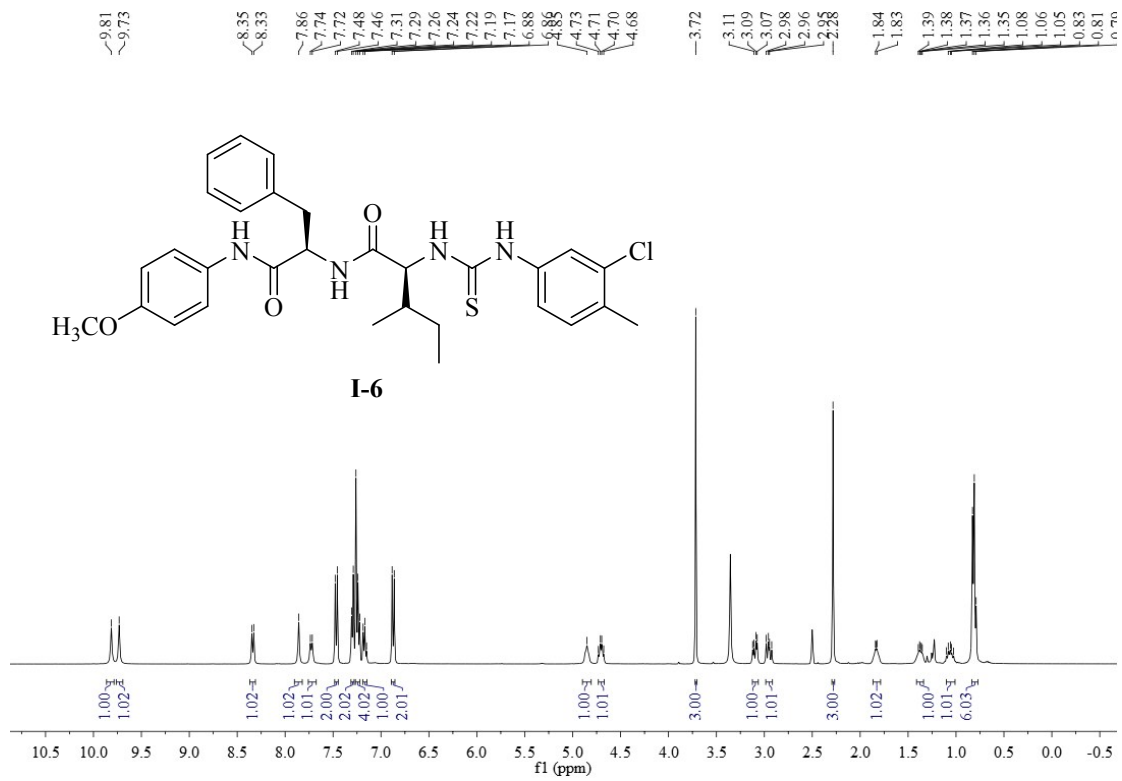

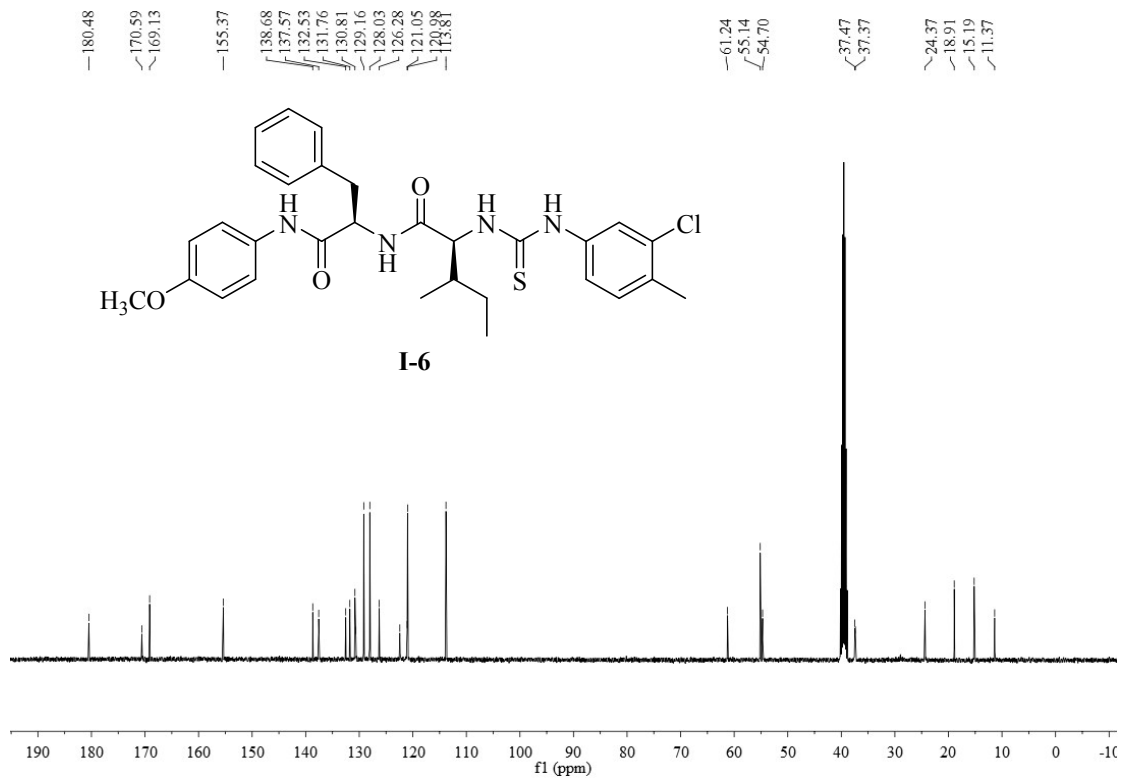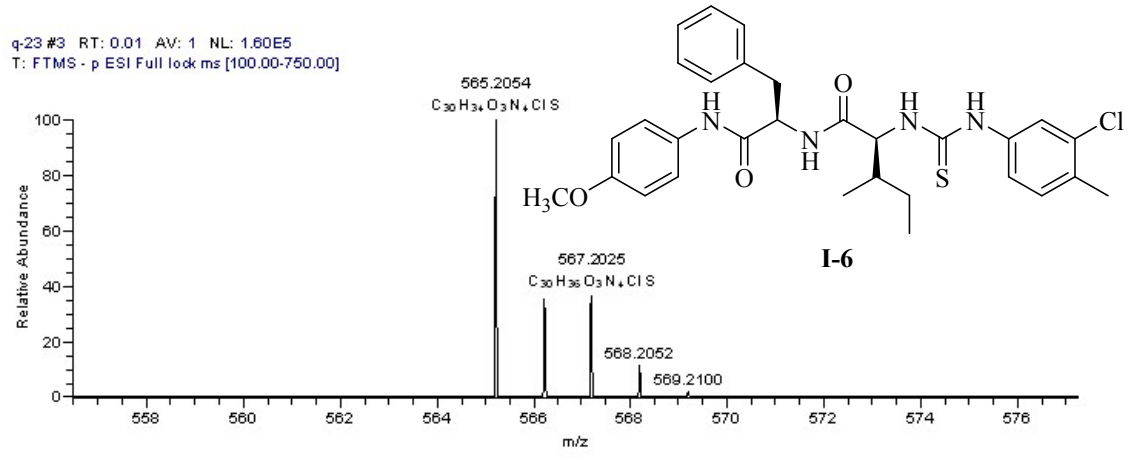

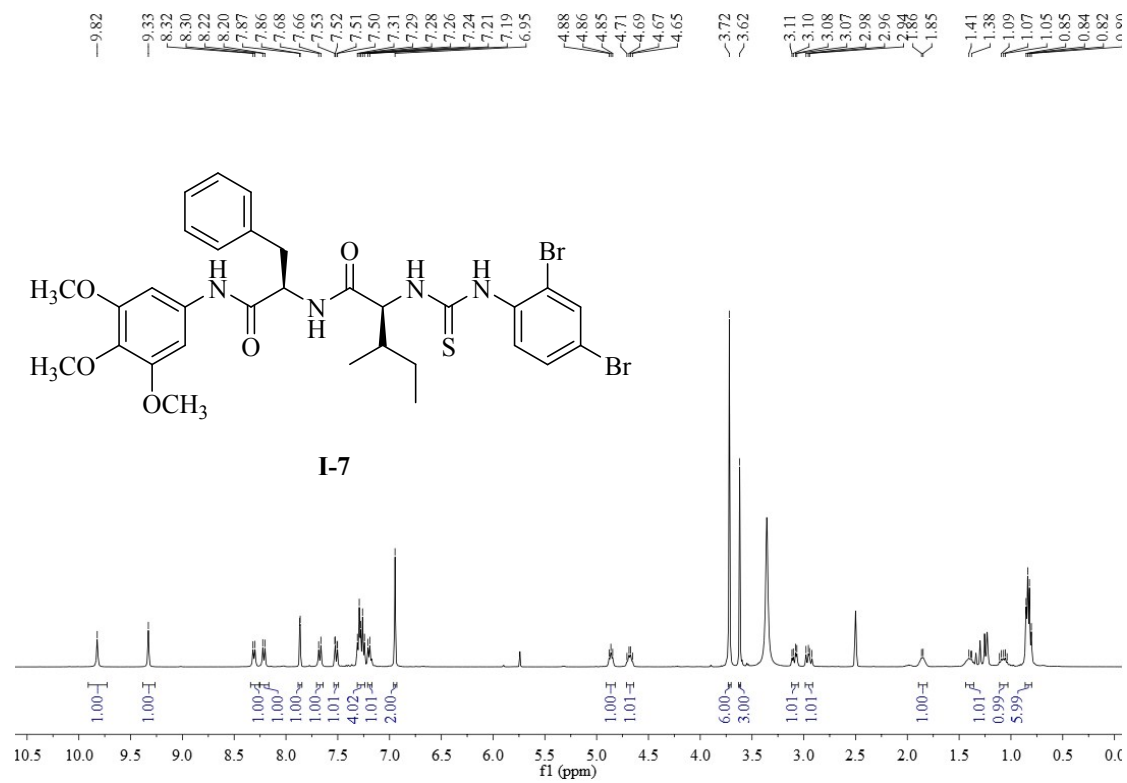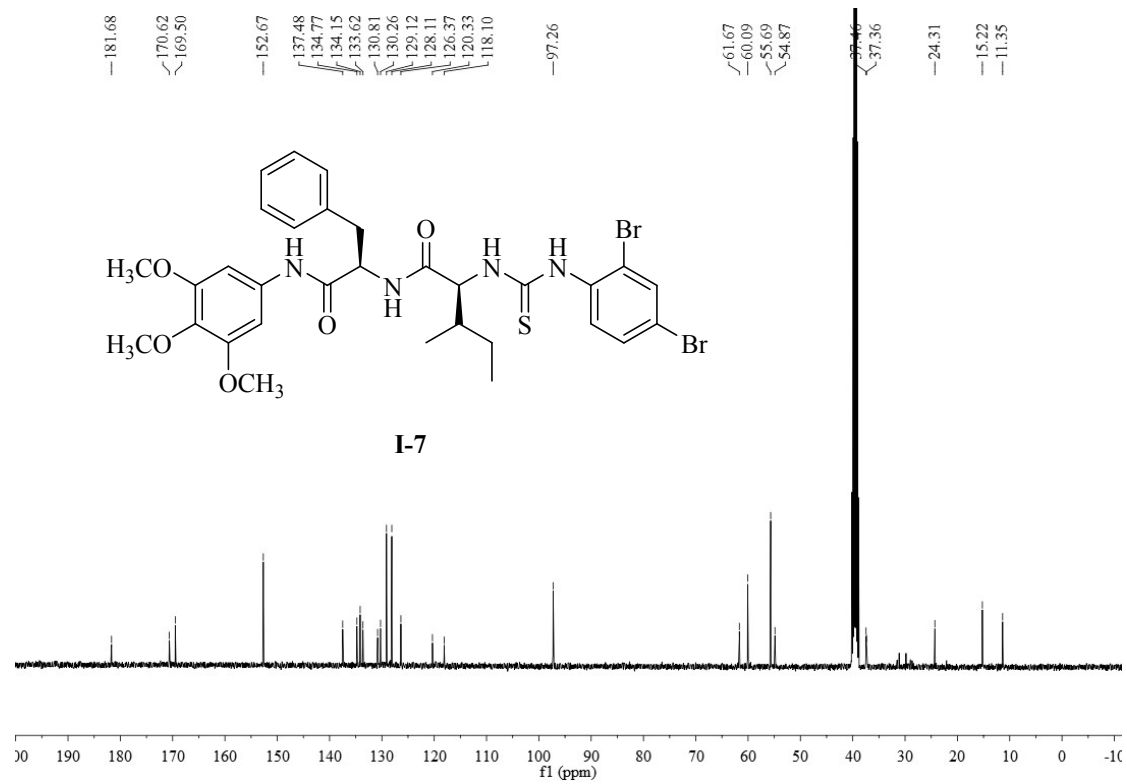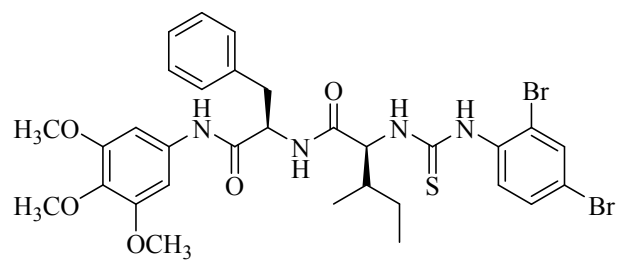

**I-7**

T: FTMS - p ESI Full lock ms [500.00-750.00]

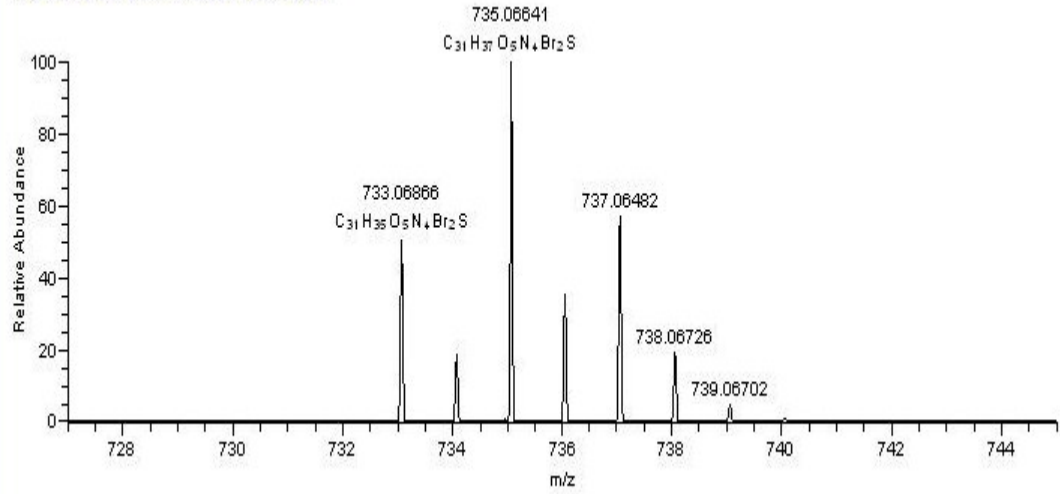

7.97, 7.96, 7.94, 7.92, 7.88, 7.88, 7.88, 7.50, 7.32, 7.25, 7.25, 6.82, 6.79, 4.85, 4.83, 4.75, 4.73, 4.71, 3.75, 3.25, 3.24, 3.22, 3.04, 3.02, 3.00, 2.98, 1.74, 1.74, 1.73, 1.72, 1.26, 1.26, 0.88, 0.87, 0.86, 0.85, 0.85, 0.77, 0.76, 0.74

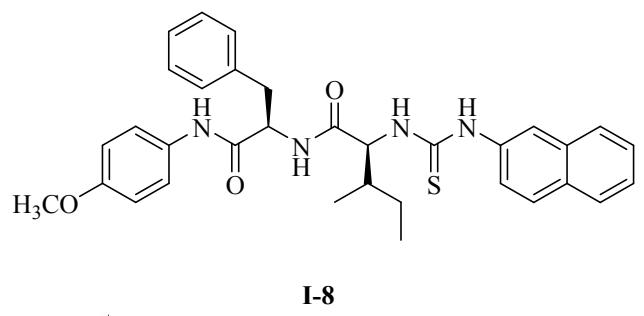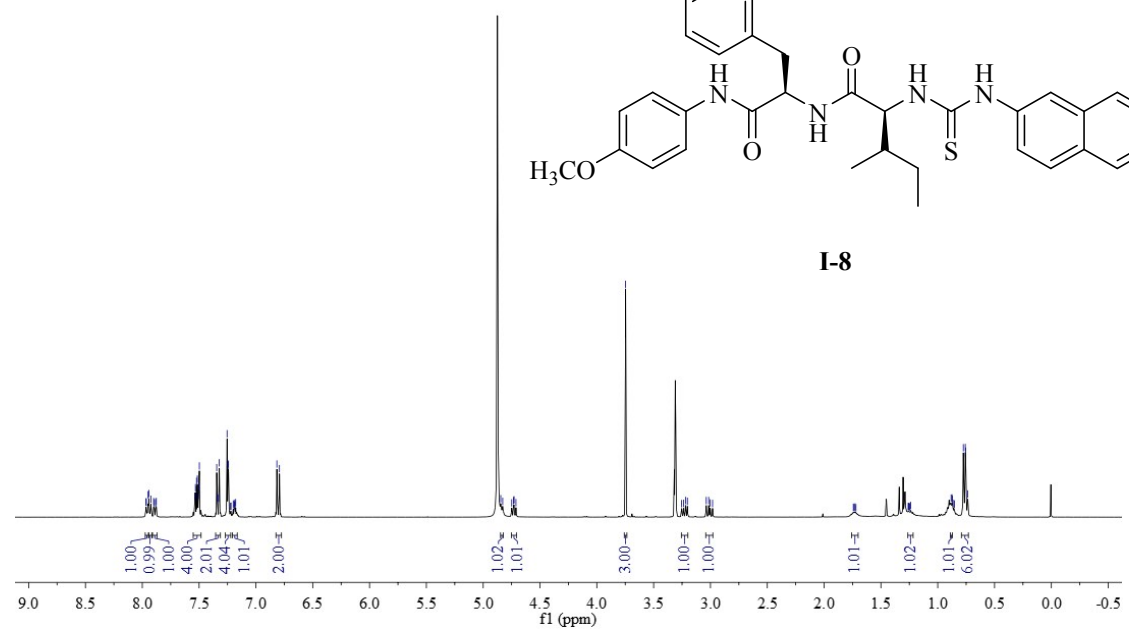

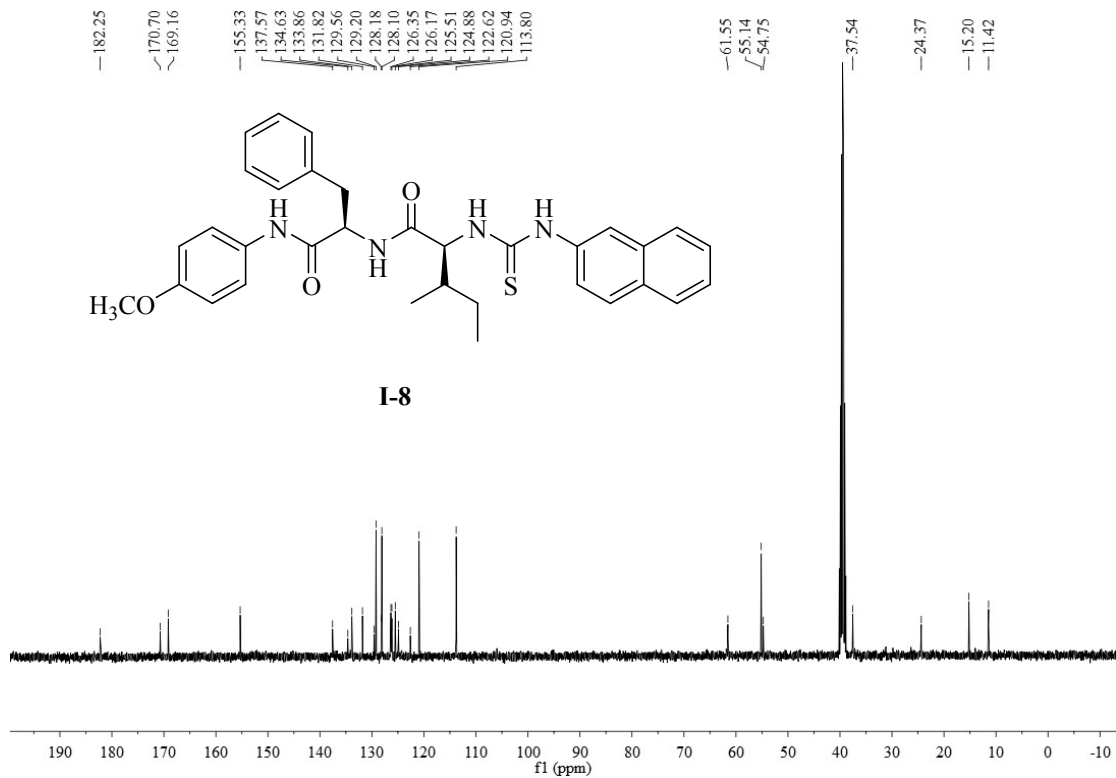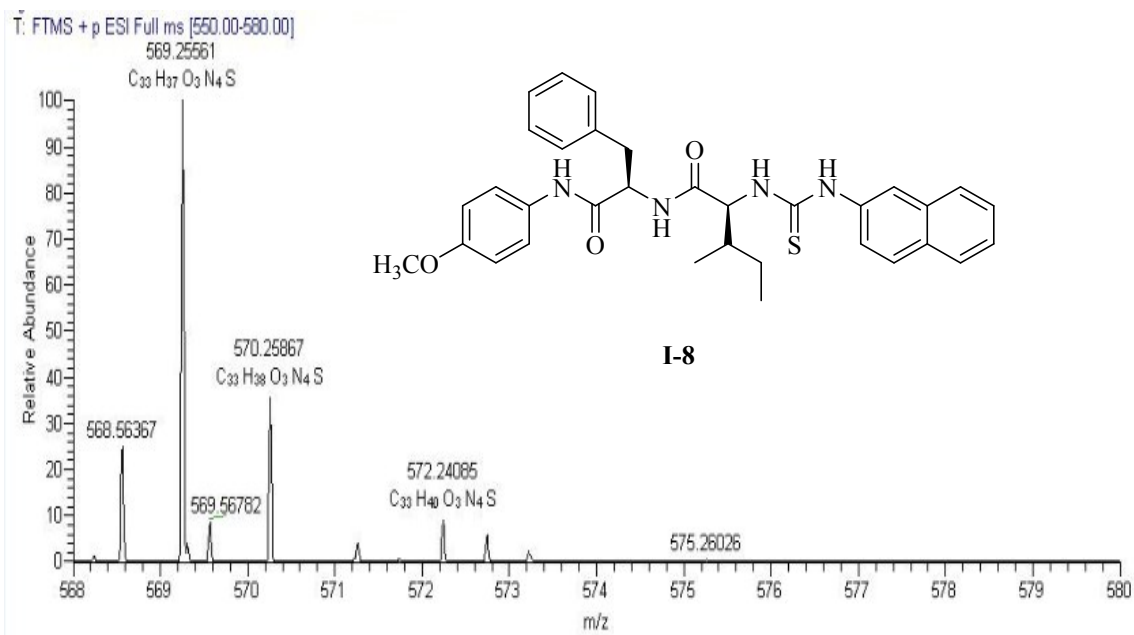

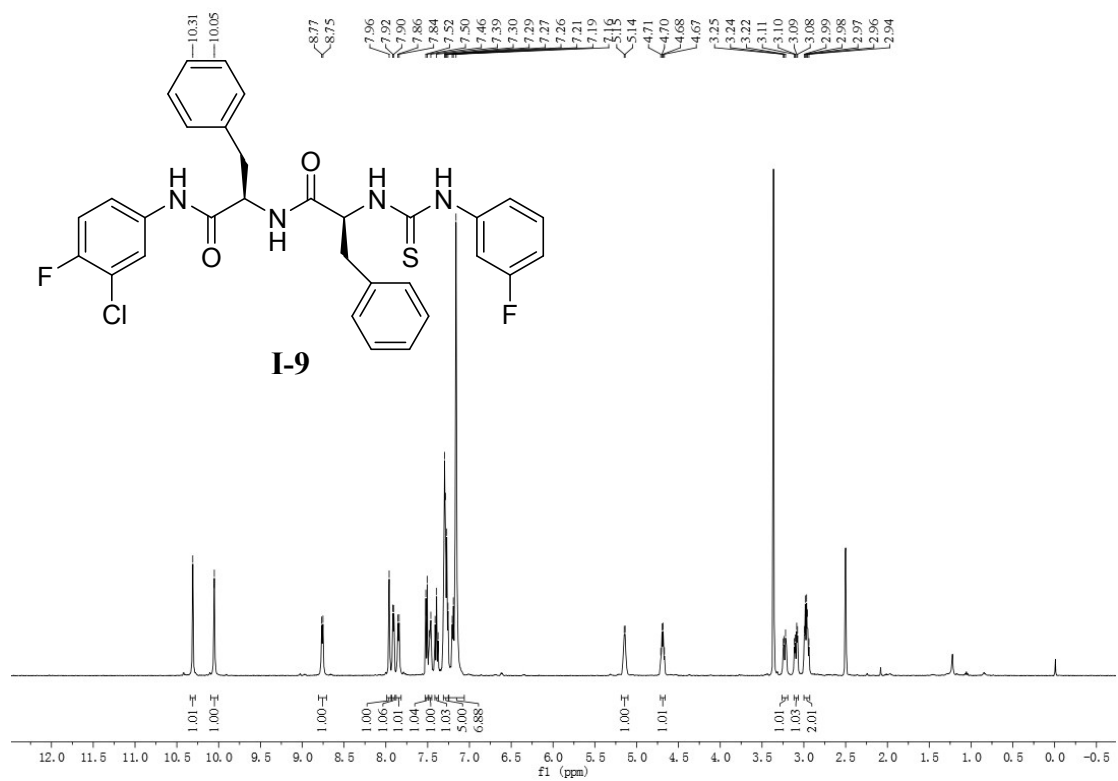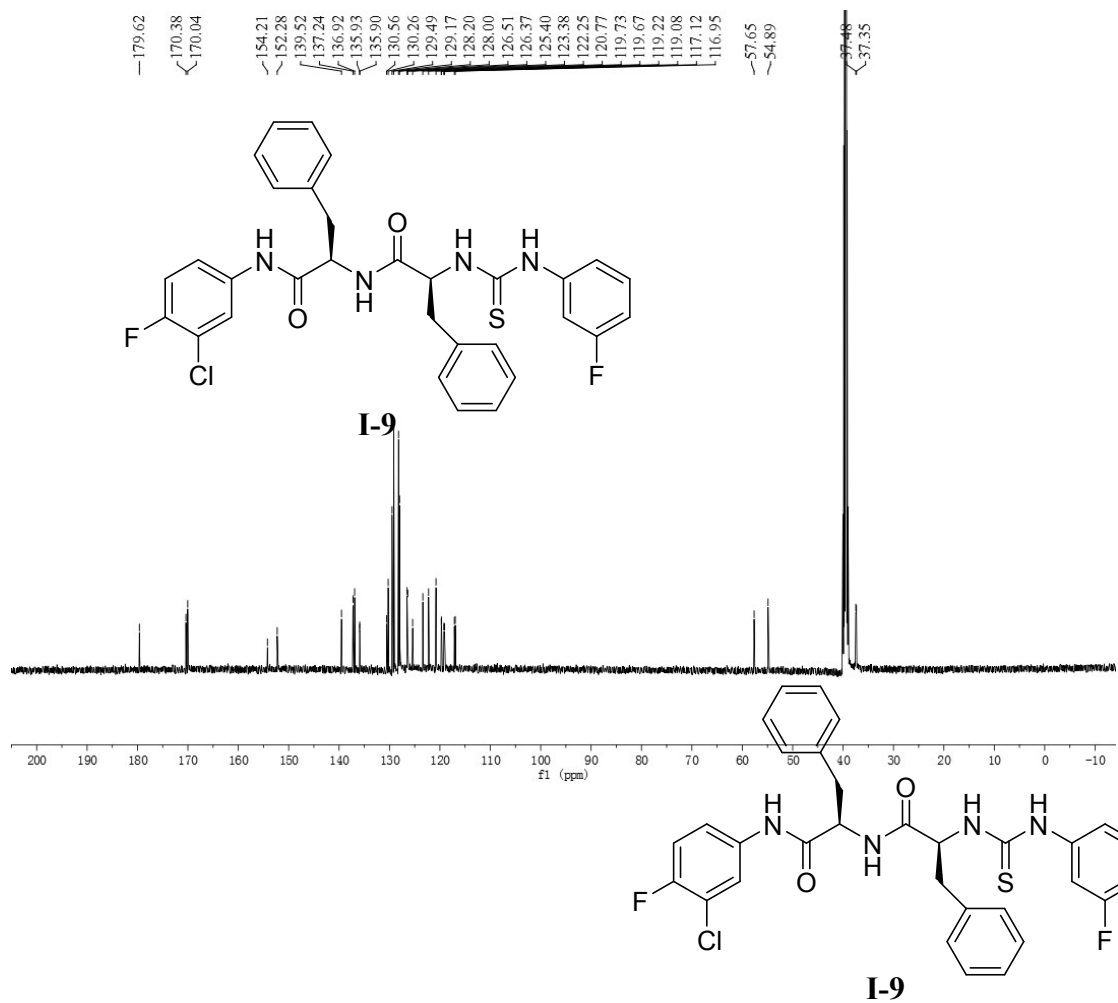



7a #2-13 RT: 0.01-0.05 AV: 12 NL: 5.09E2  
T: FTMS + p ESI Full lock ms [550.00-700.00]

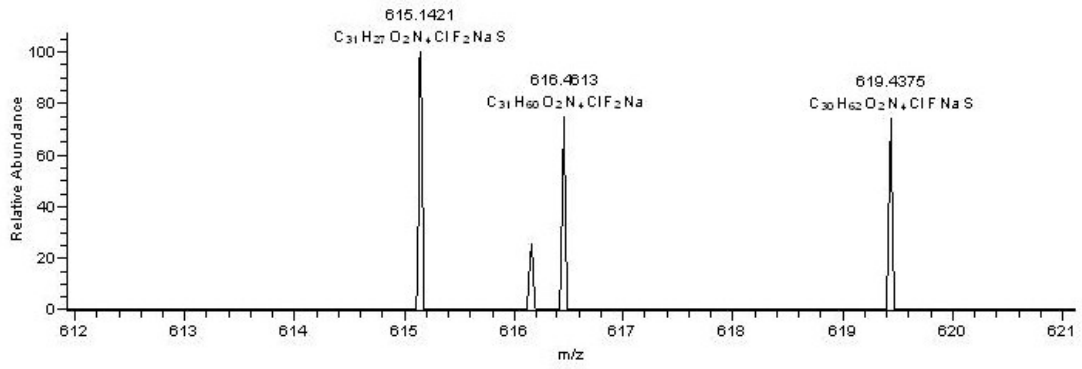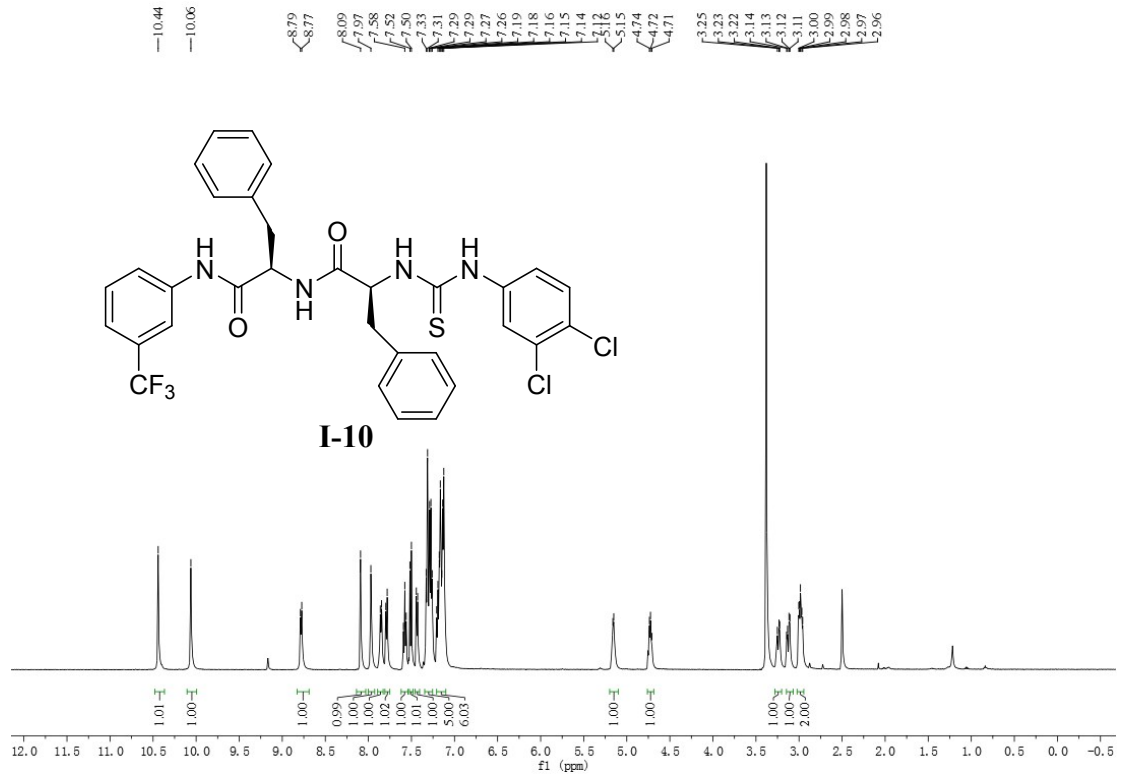

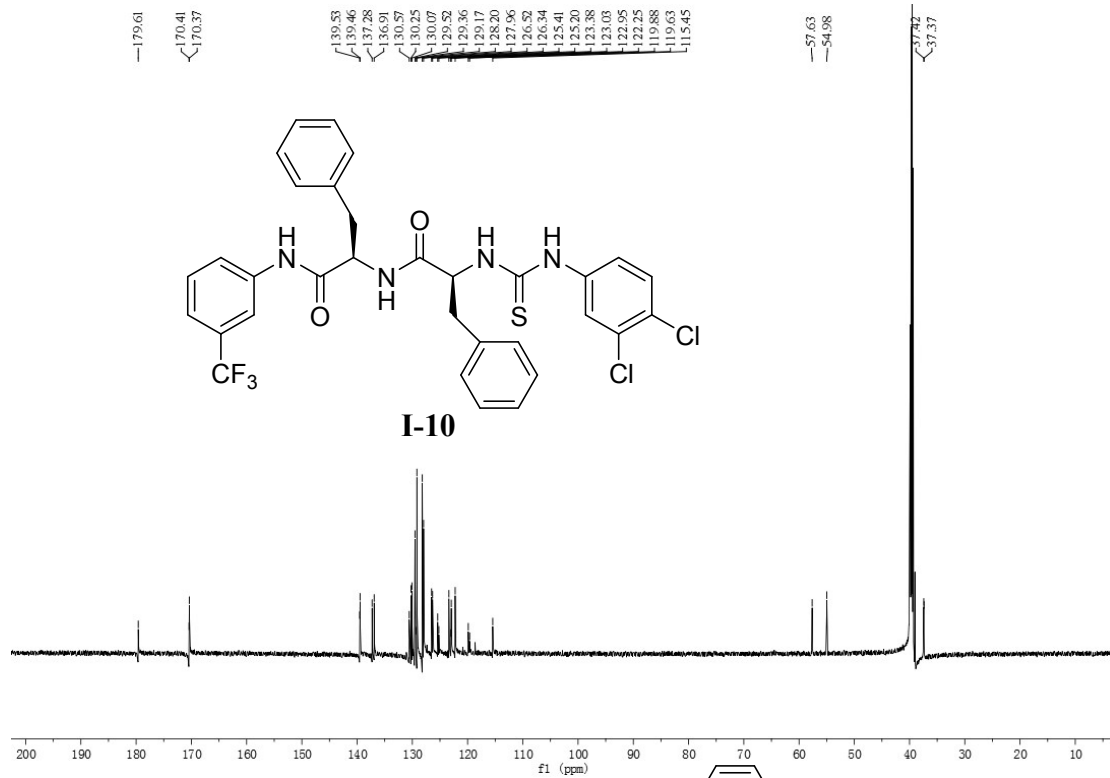

7c #2 RT: 0.01 AV: 1 NL: 1.73E5

T: FTMS + p ESI Full lock ms [600.00-700.10]

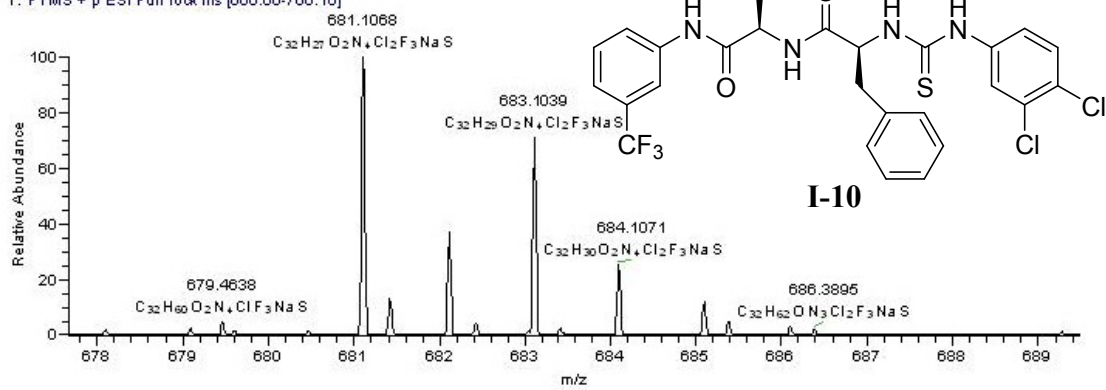

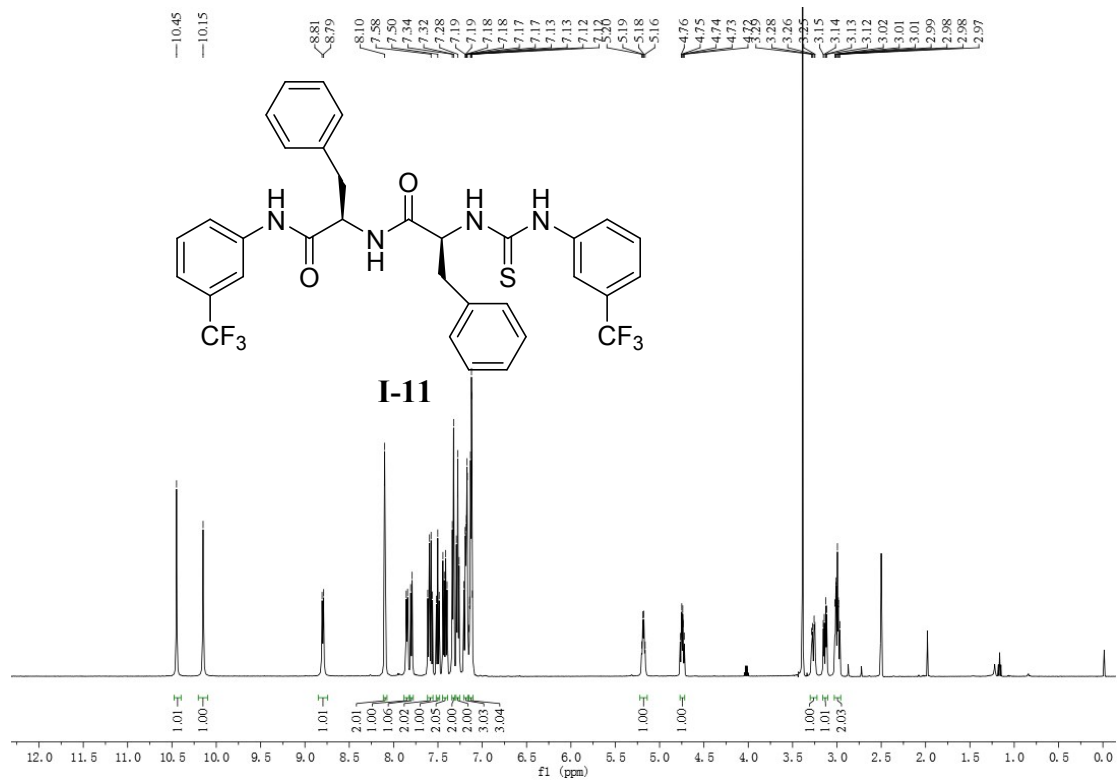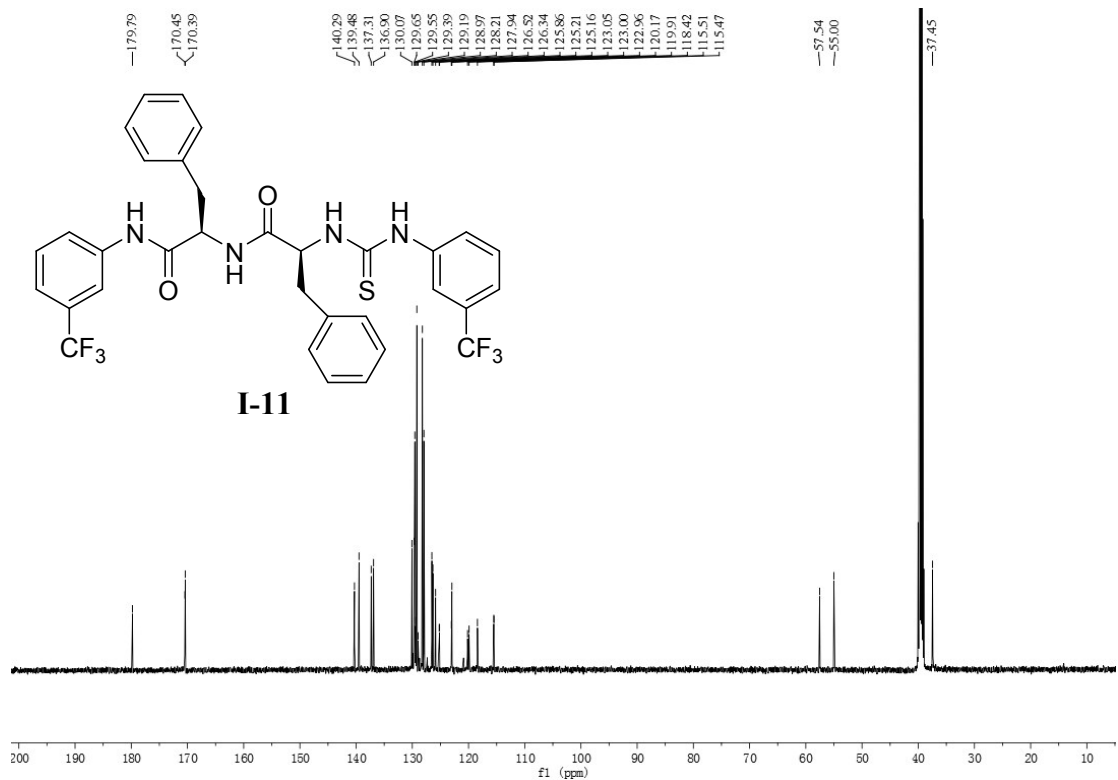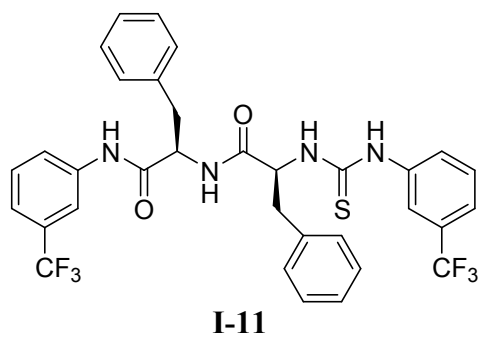

7d #1-33 RT: 0.01-0.11 AV: 33 NL: 7.34E5  
T: FTMS + p ESI Full lock ms [800.00-700.00]

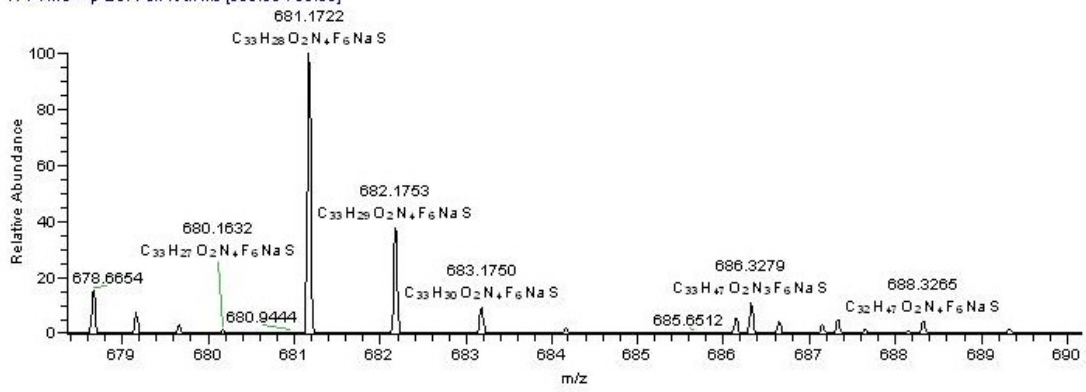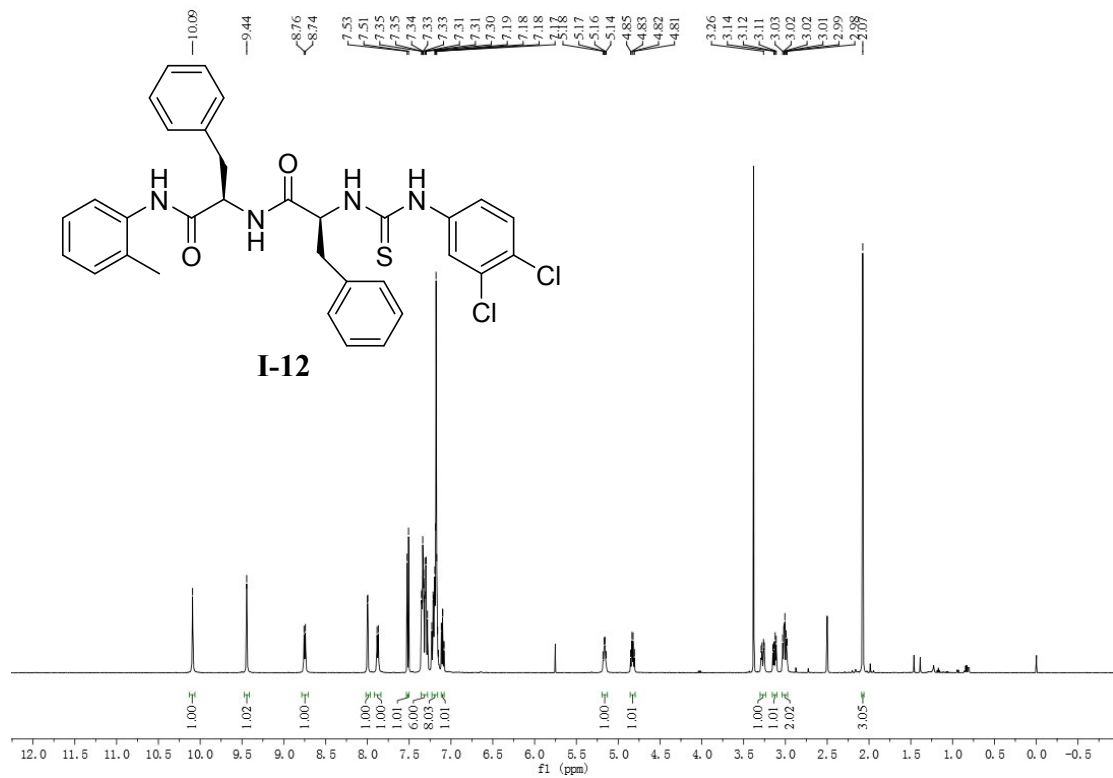

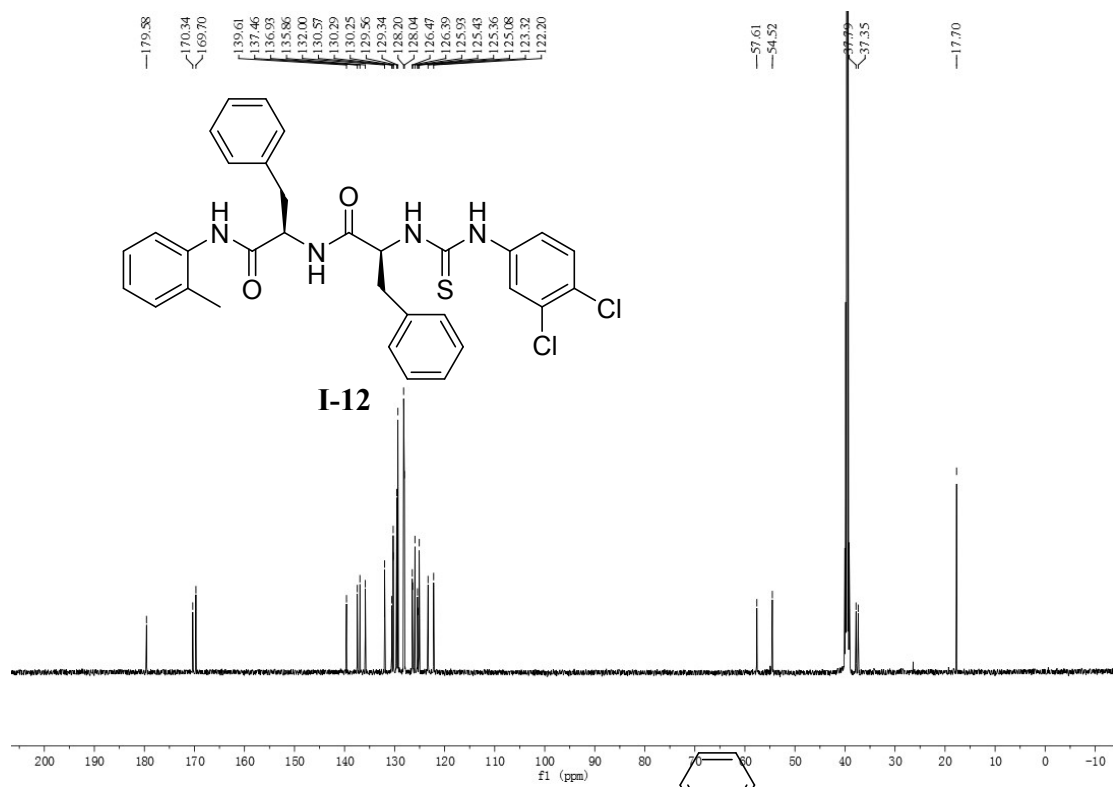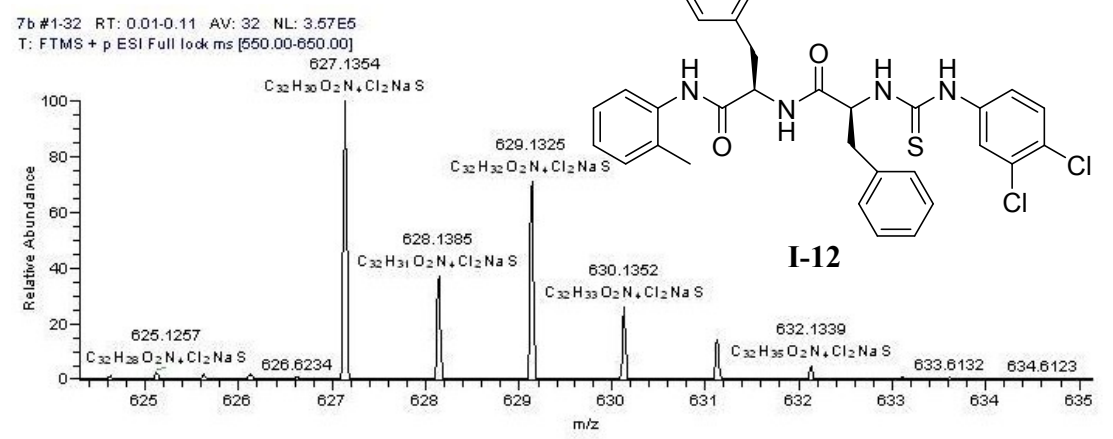

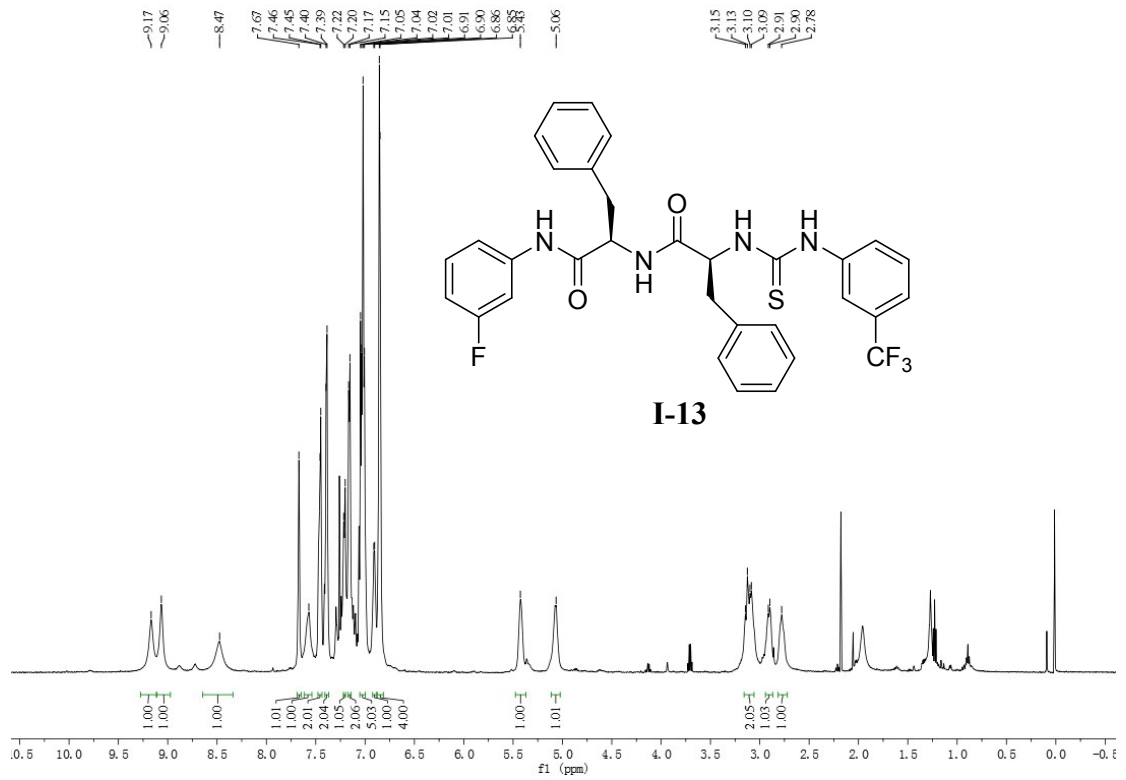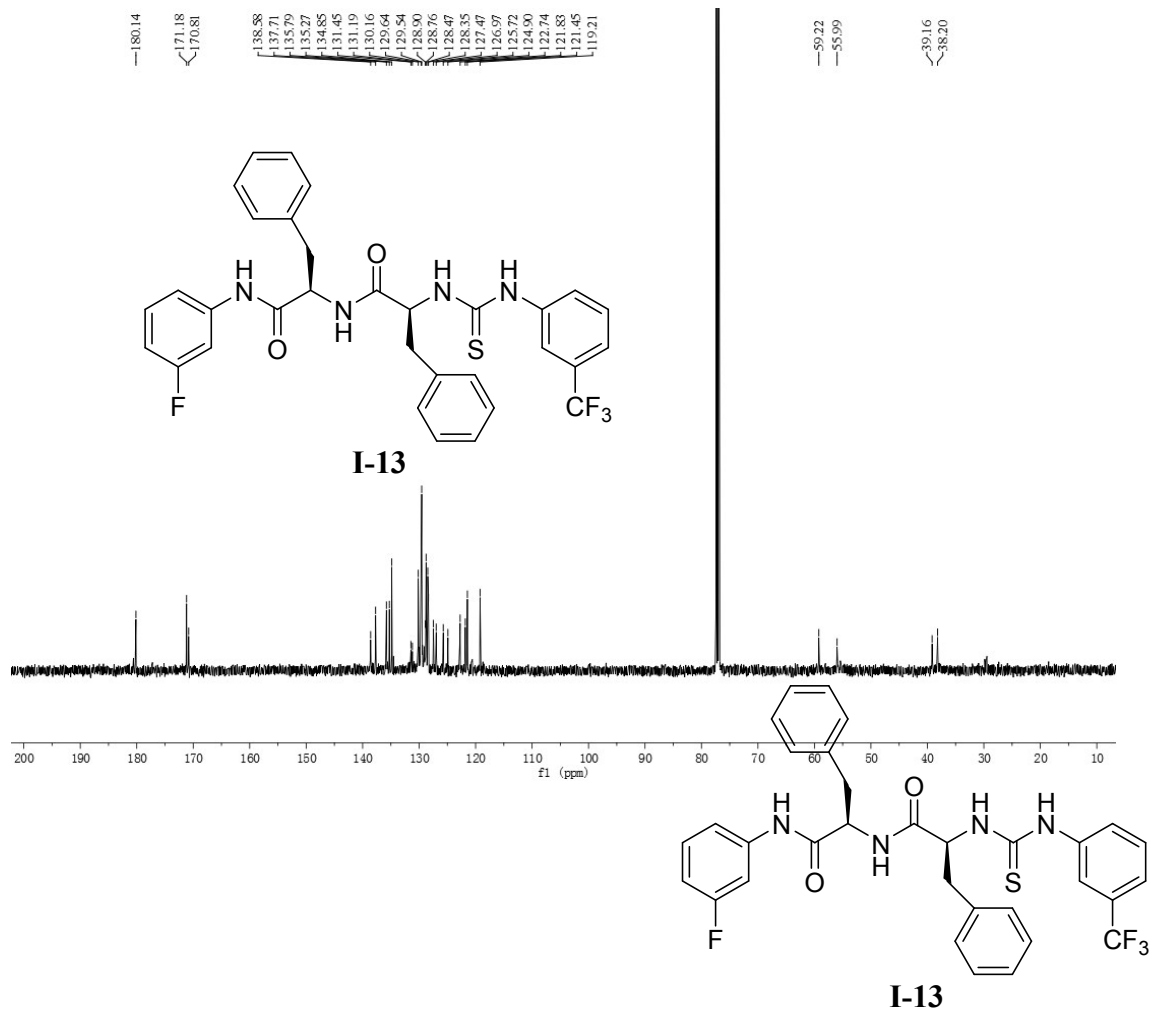

7e #2-36 RT: 0.01-0.12 AV: 35 NL: 2.81E5  
T: FTMS + p ESI Full lock ms [550.00-650.00]

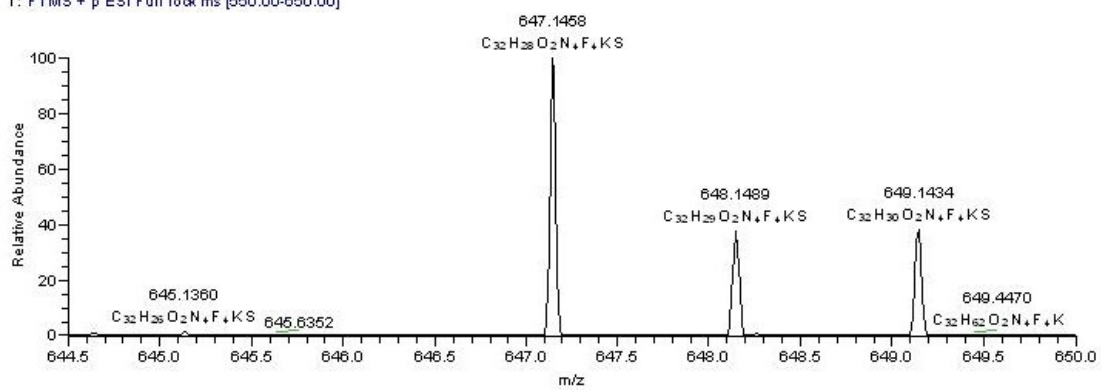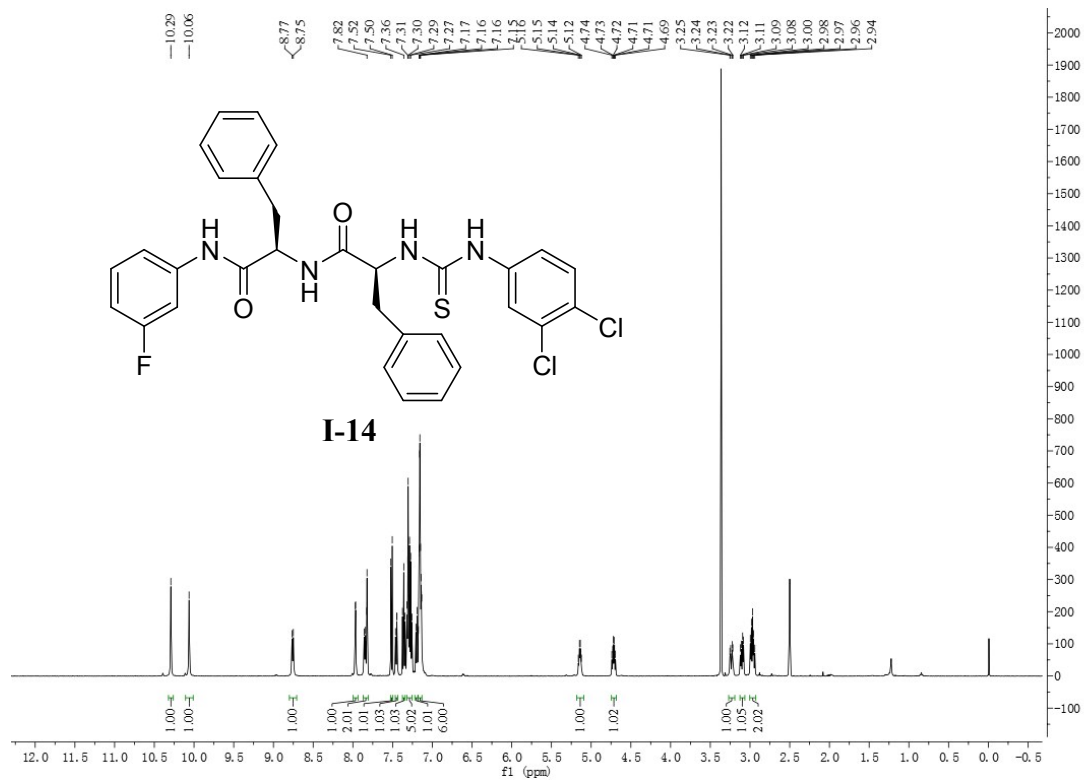

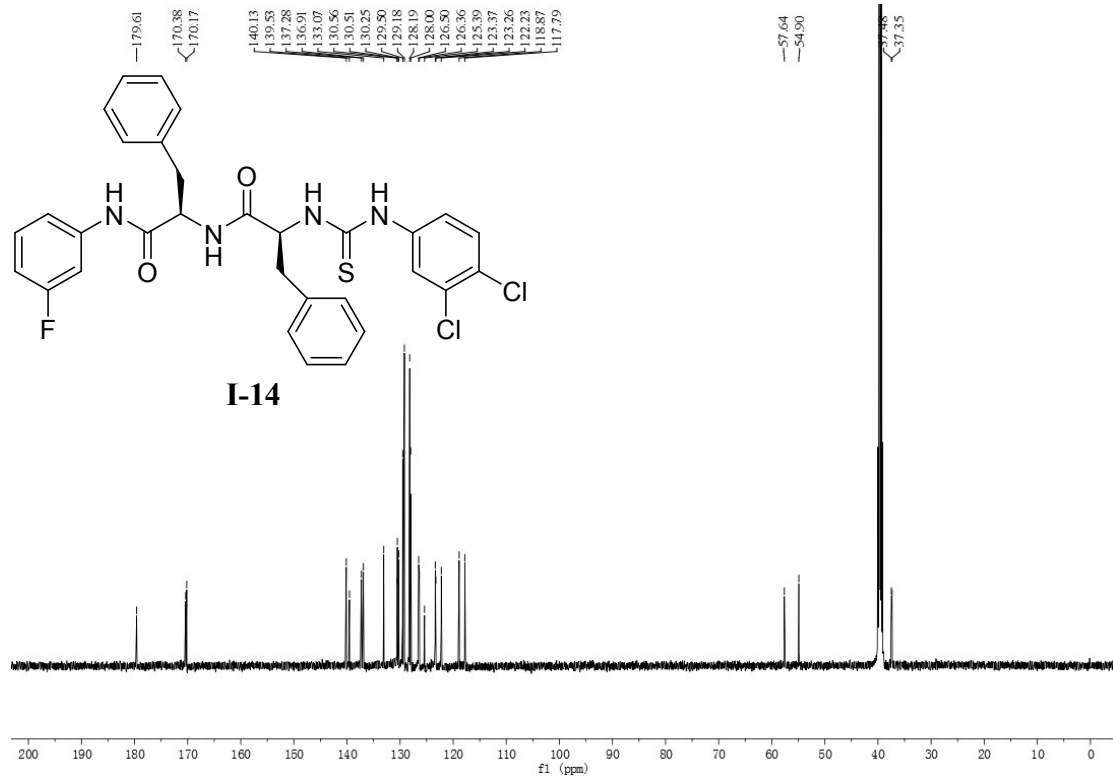

7f #2-34 RT: 0.01-0.12 AV: 33 NL: 1.17E5  
 T: FTMS + p ESI Full lock ms [550.00-700.00]

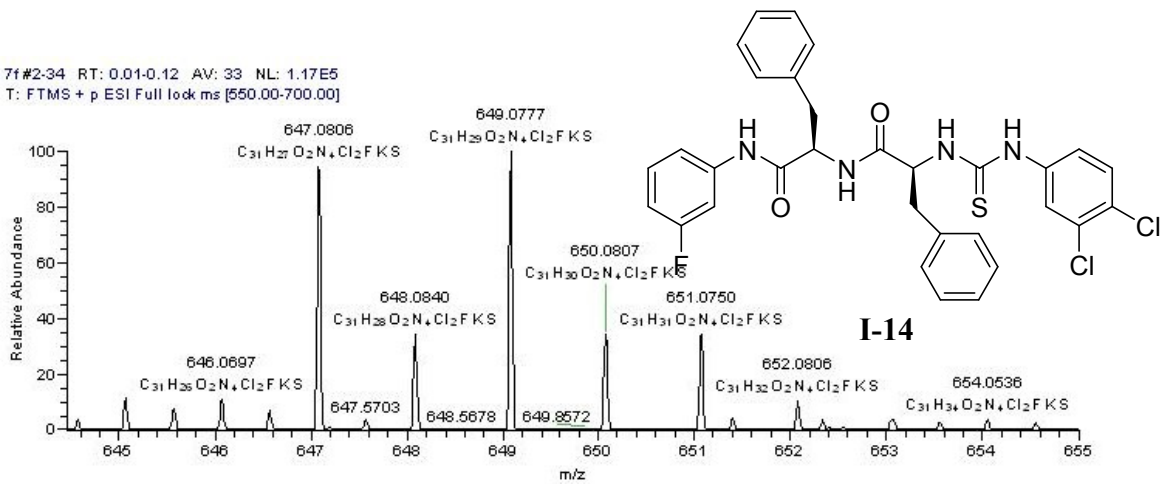



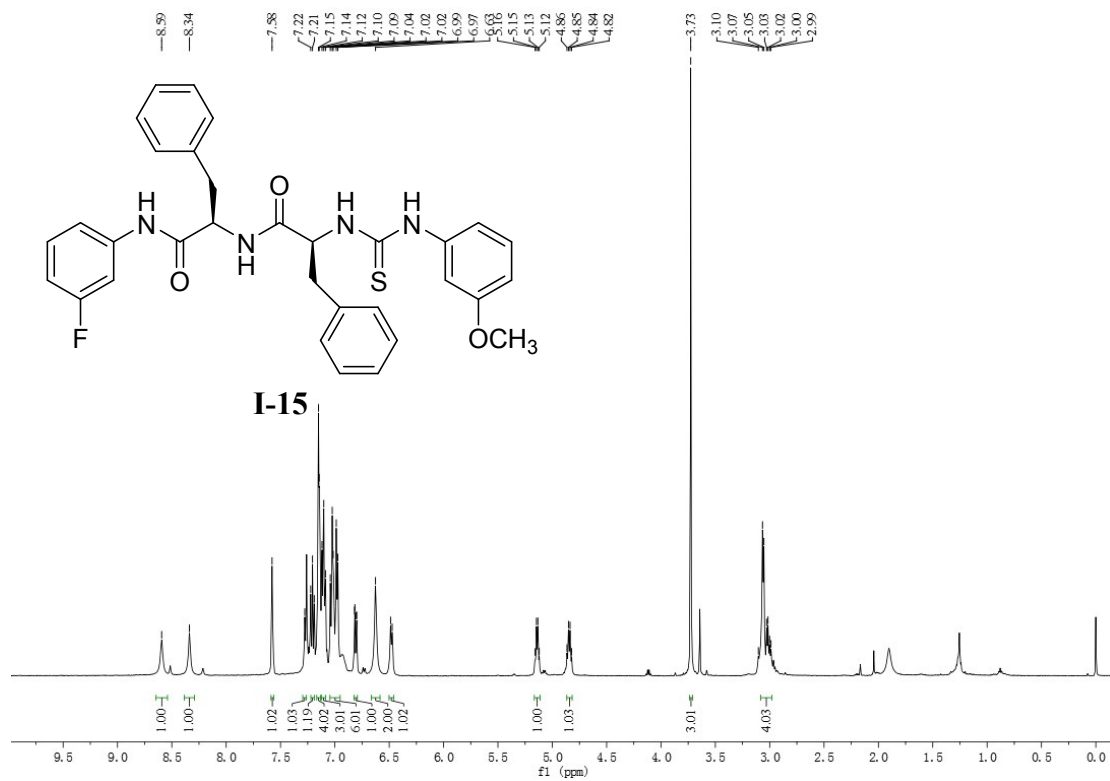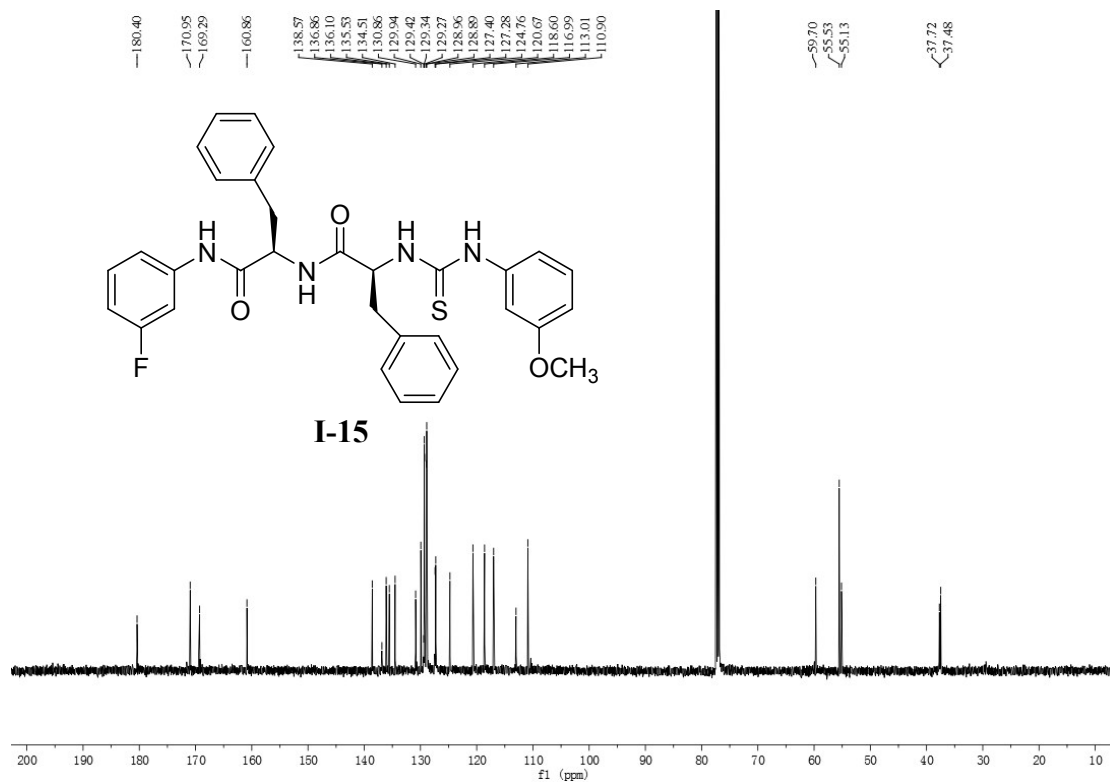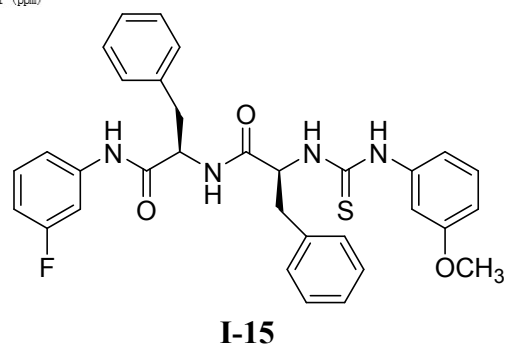

7g #2-38 RT: 0.01-0.13 AV: 37 NL: 4.58E5  
T: FTMS + p ESI Full lock ms [550.00-650.10]

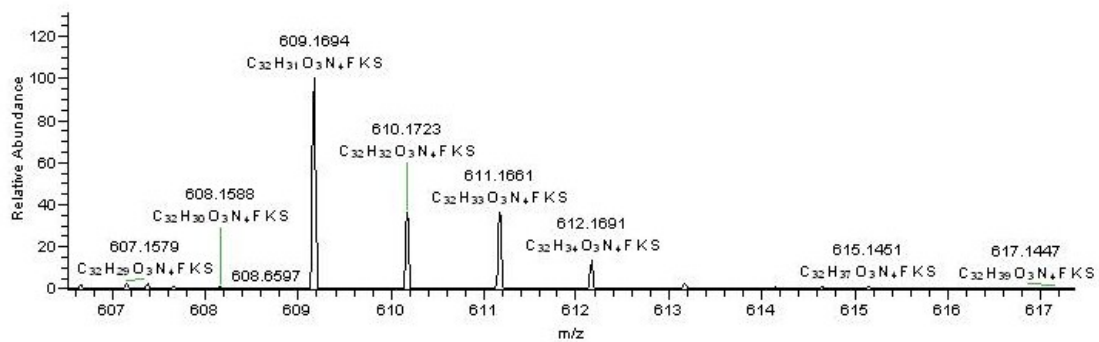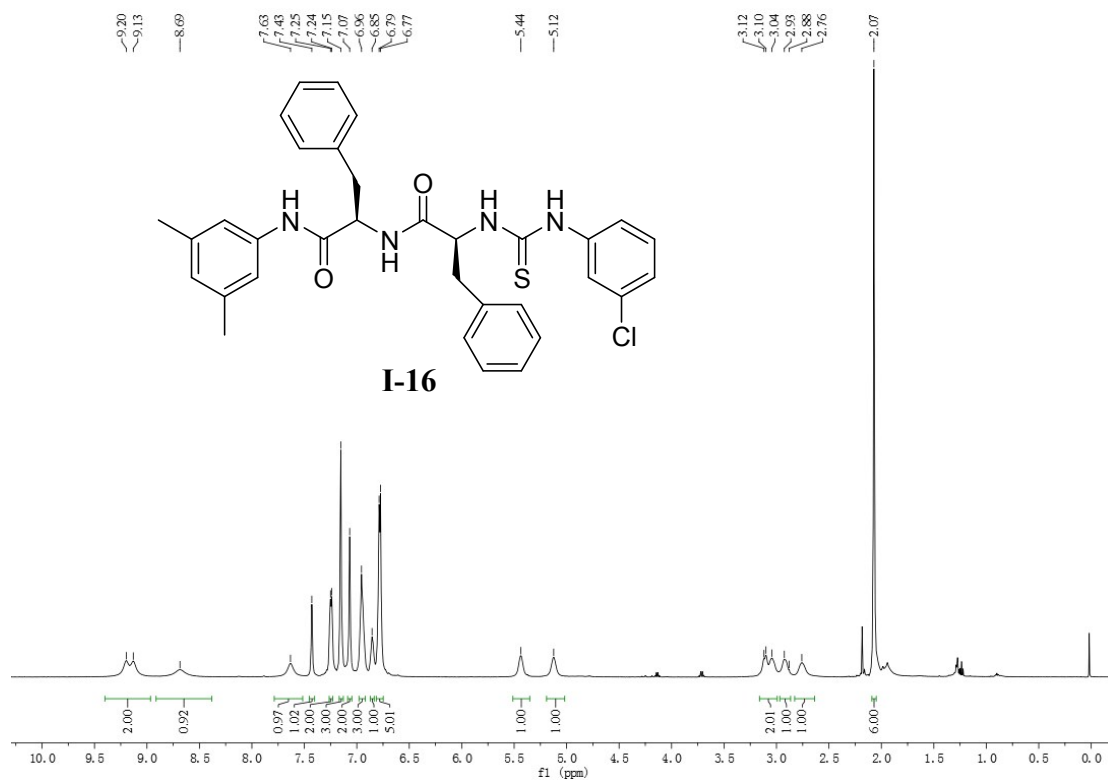

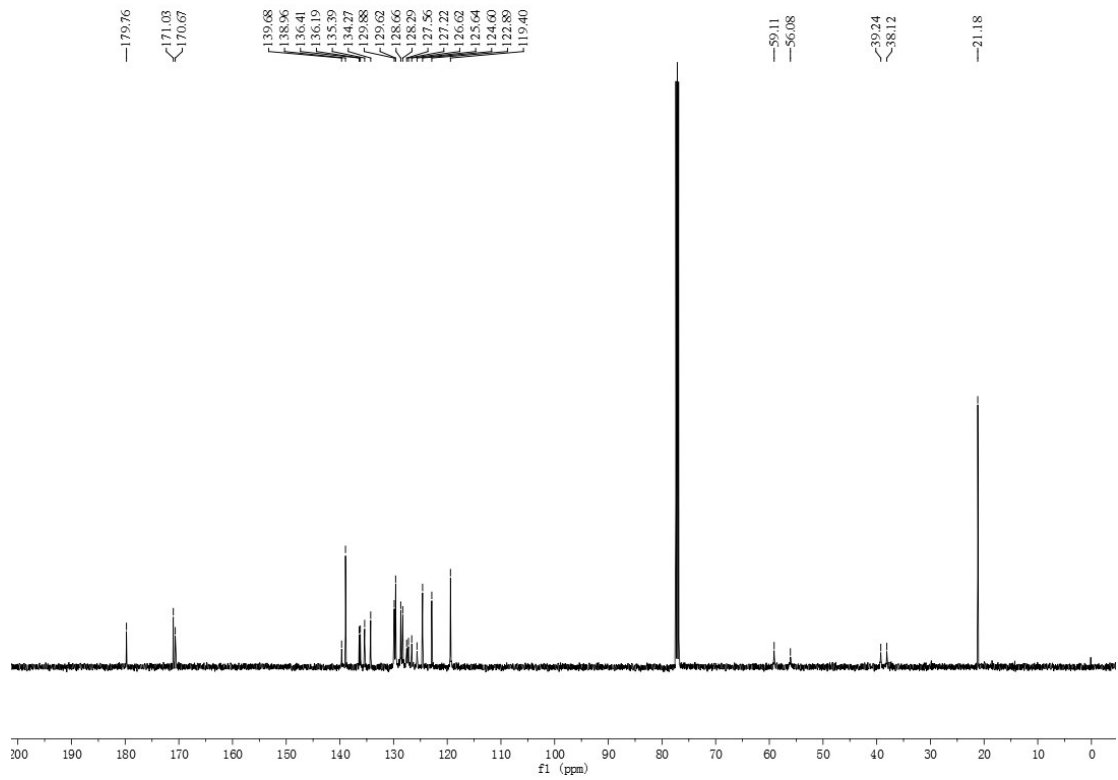

7j #2-31 RT: 0.01-0.11 AV: 30 NL: 3.40E5  
 T: FTMS + p ESI Full lock ms [550.00-700.00]

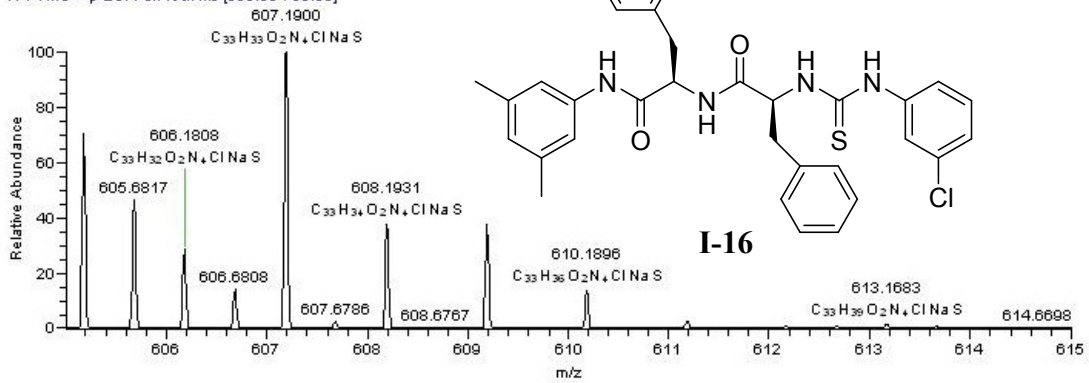

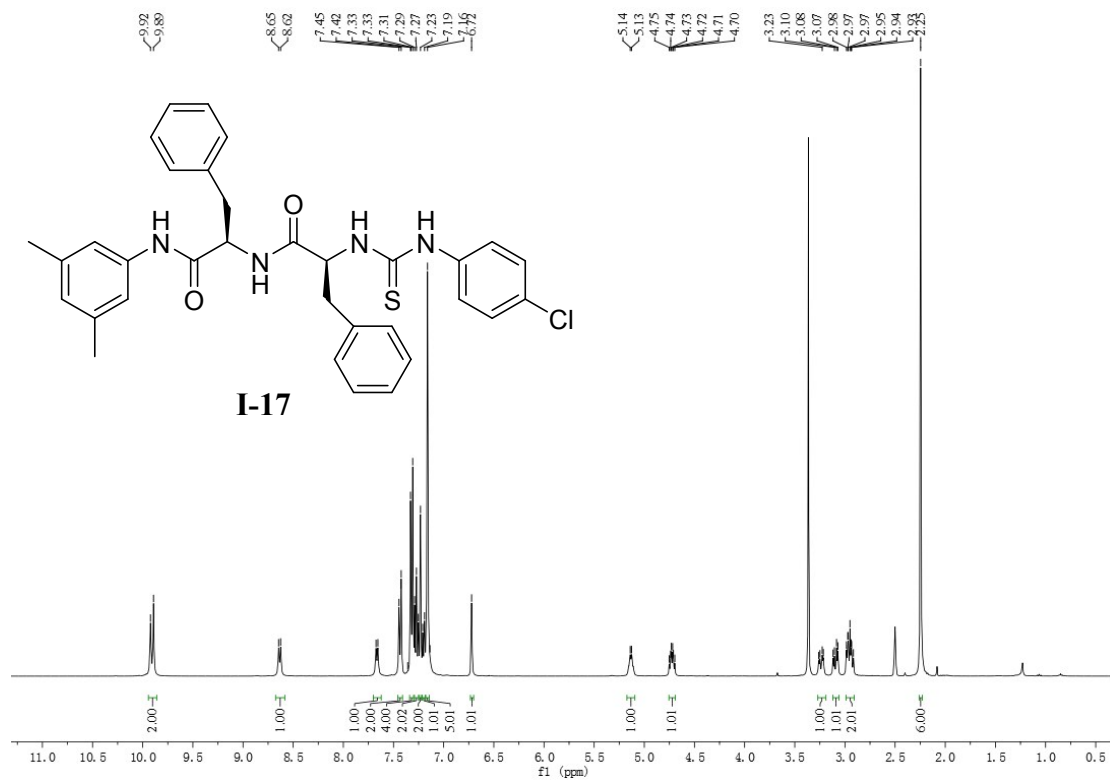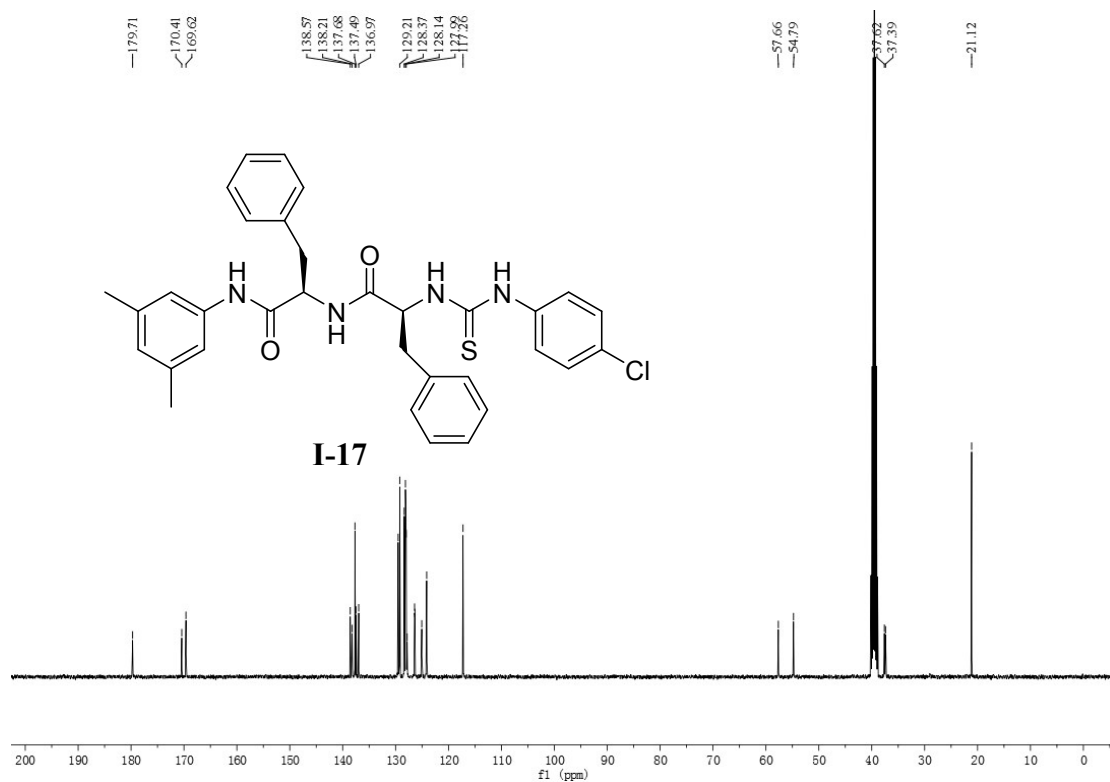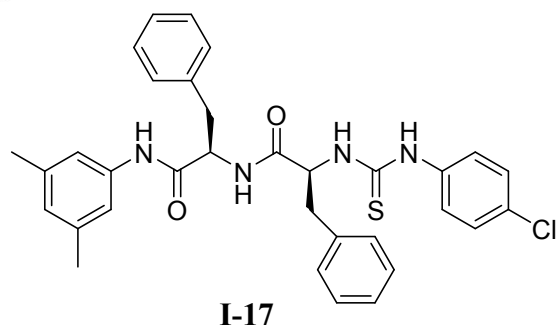

71#2-34 RT: 0.01-0.12 AV: 33 NL: 2.97E5  
T: FTMS + p ESI Full lock ms [550.00-700.00]

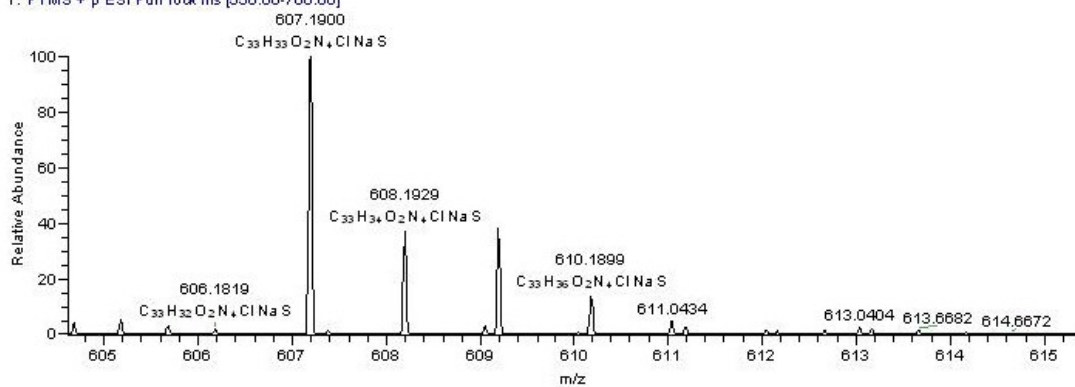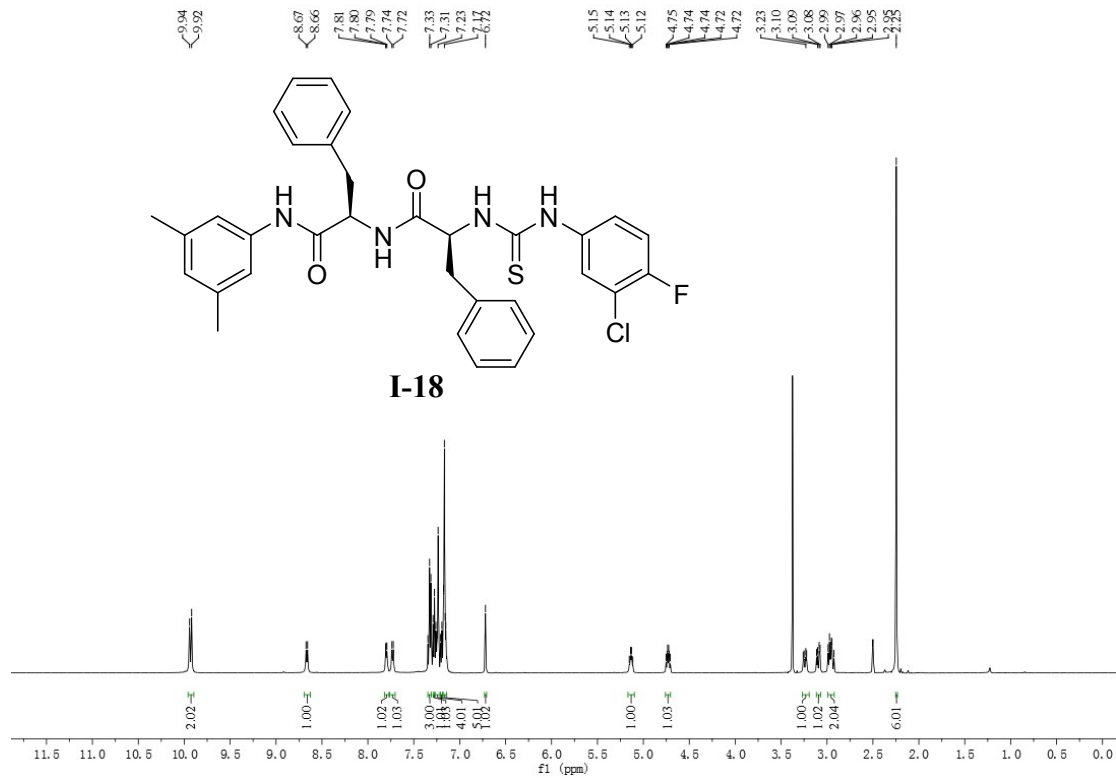

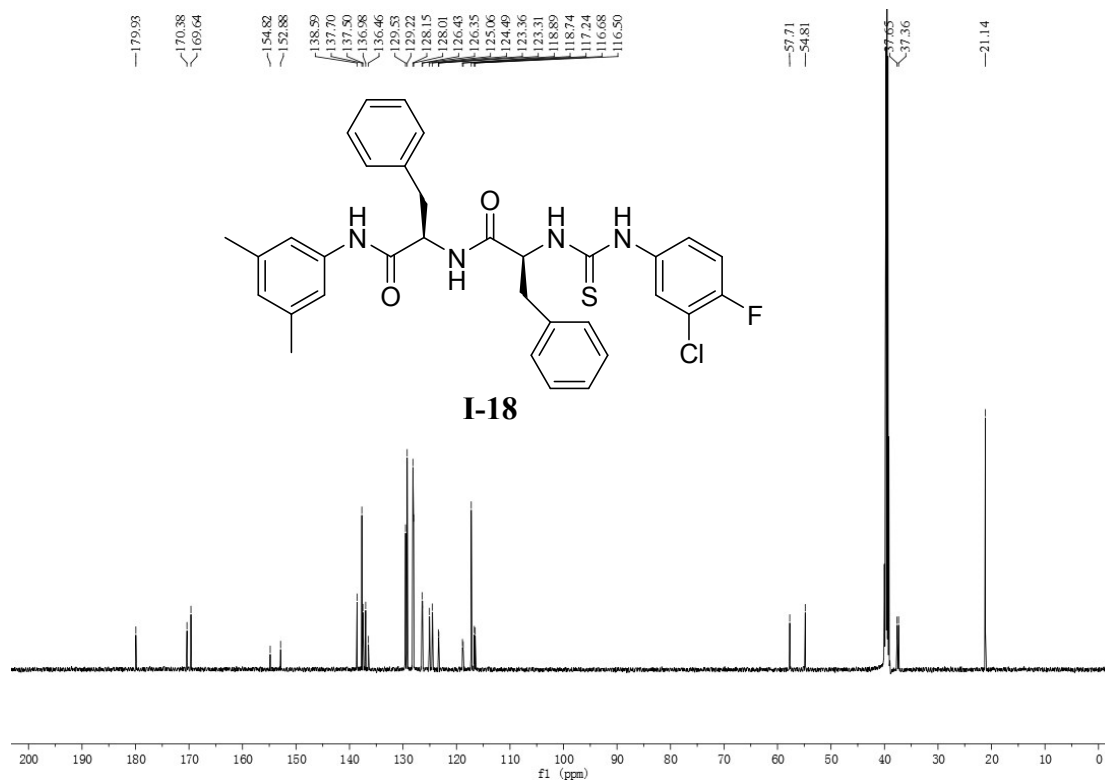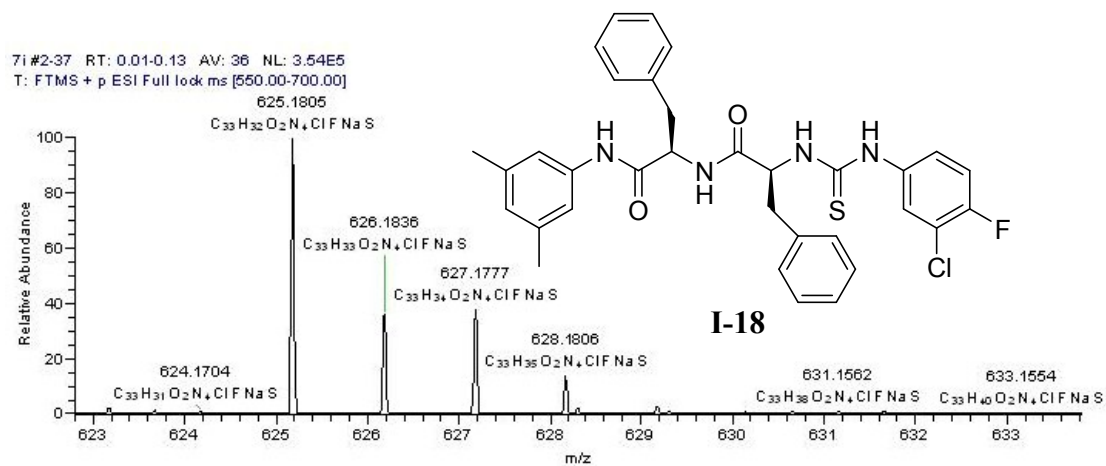

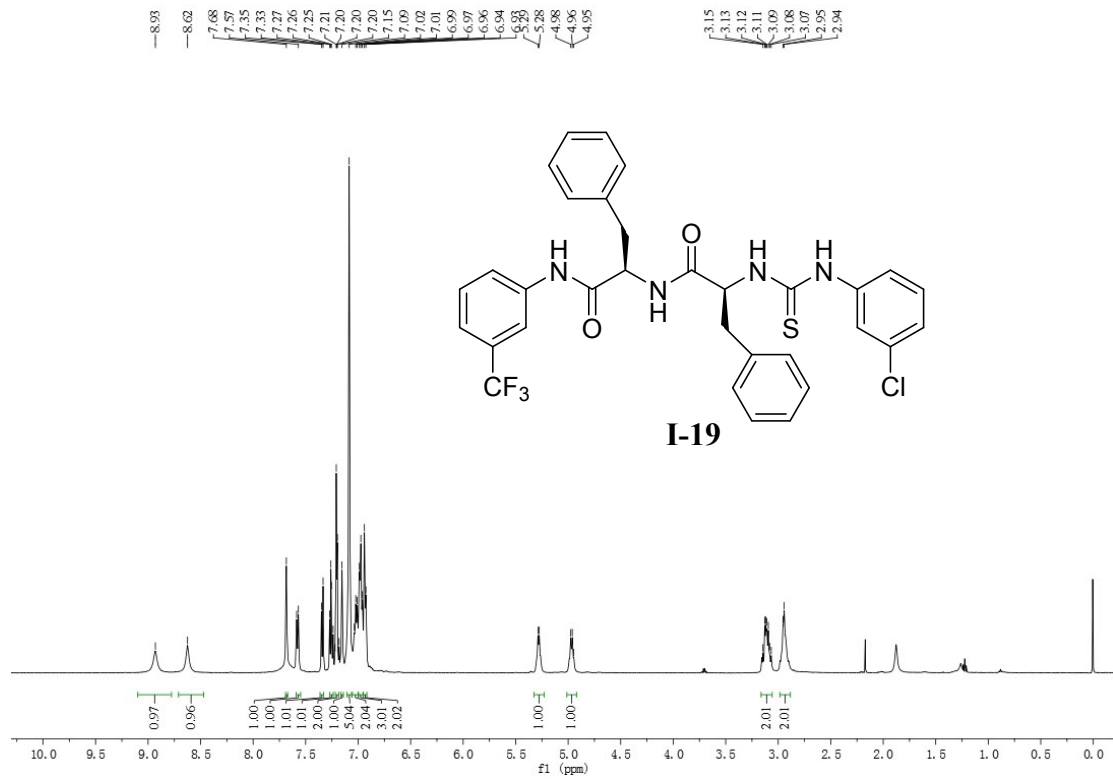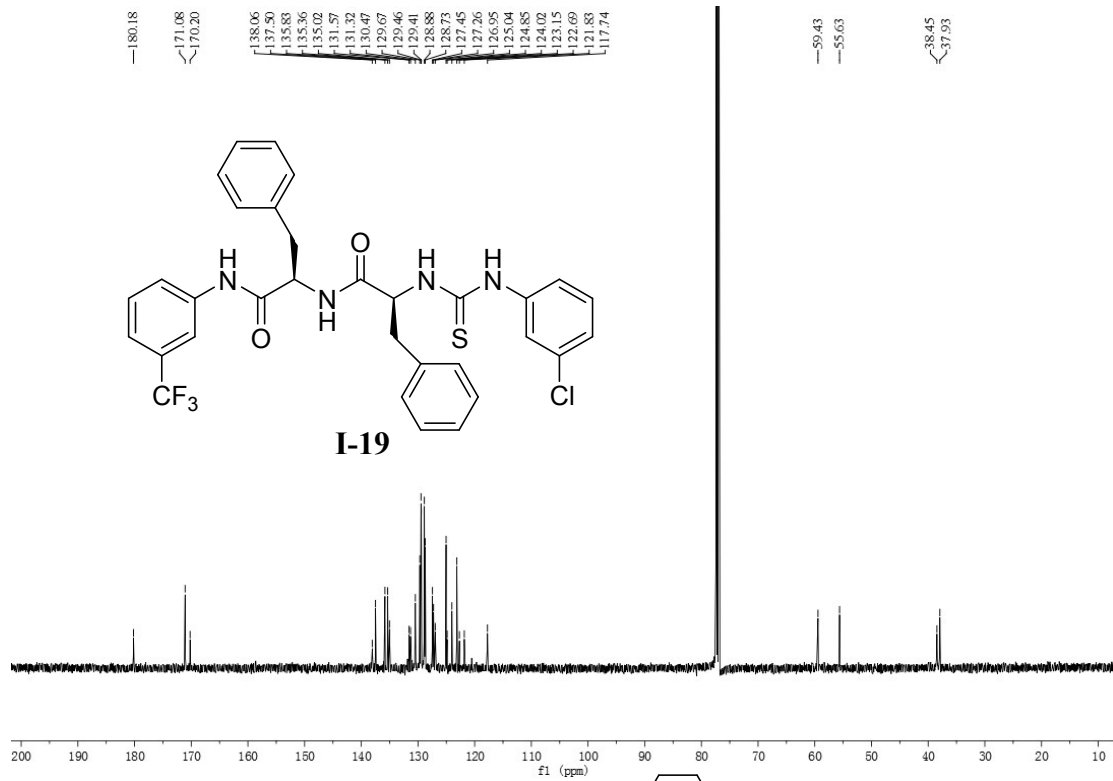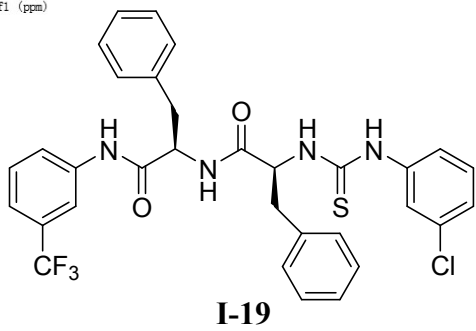

7k #2-30 RT: 0.01-0.10 AV: 29 NL: 3.27E5  
T: FTMS + p ESI Full lock ms [600.00-700.10]

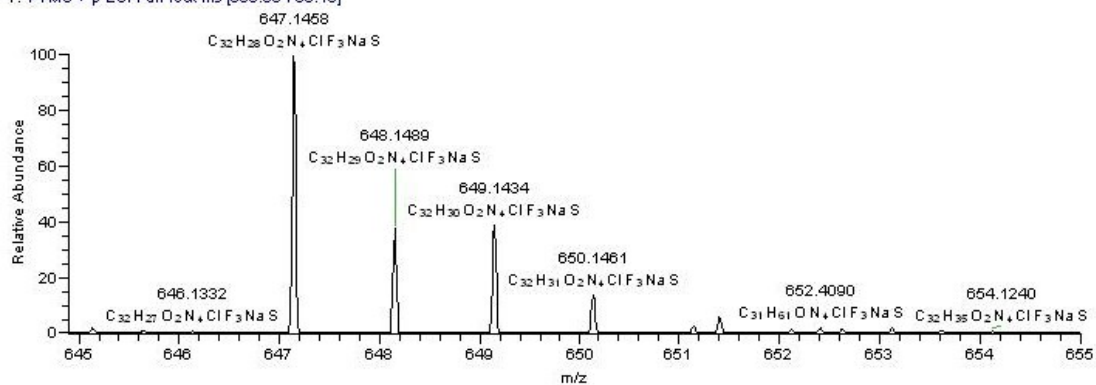

-10.21  
-9.88  
8.26  
8.24  
7.85  
7.83  
7.59  
7.56  
7.55  
7.49  
7.48  
7.47  
7.46  
-4.94  
-4.30  
-4.28  
-4.26  
2.15  
2.13  
2.12  
2.10  
1.82  
1.80  
1.54  
1.22  
1.20  
1.18  
1.17  
1.15  
1.13  
0.88  
0.87  
0.84  
0.82

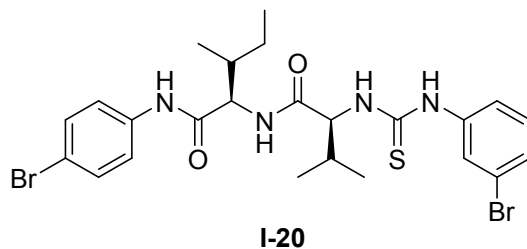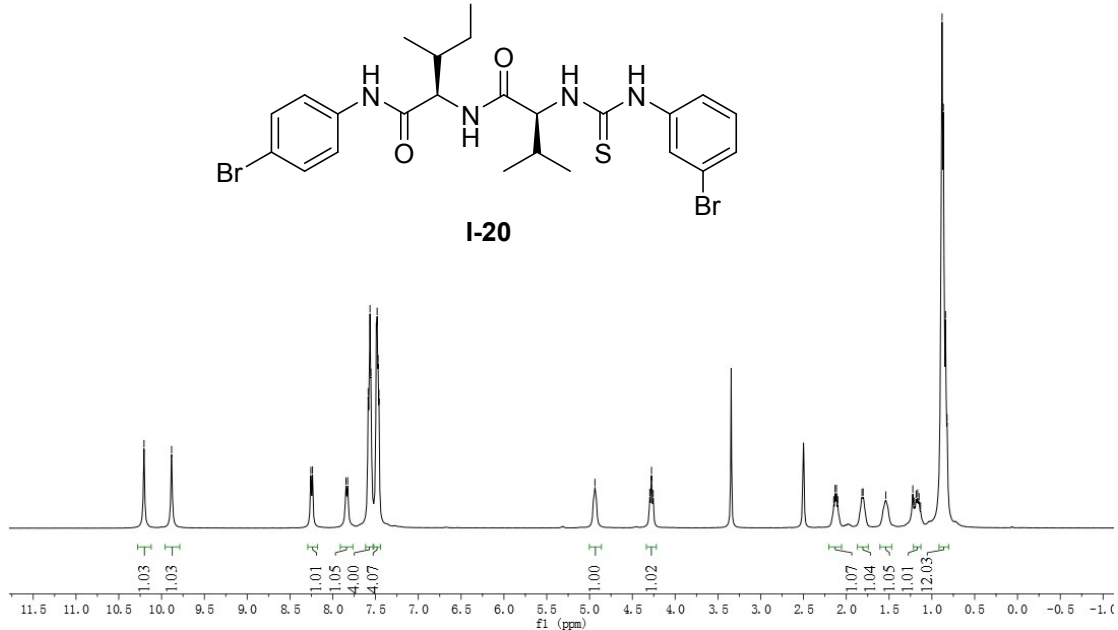



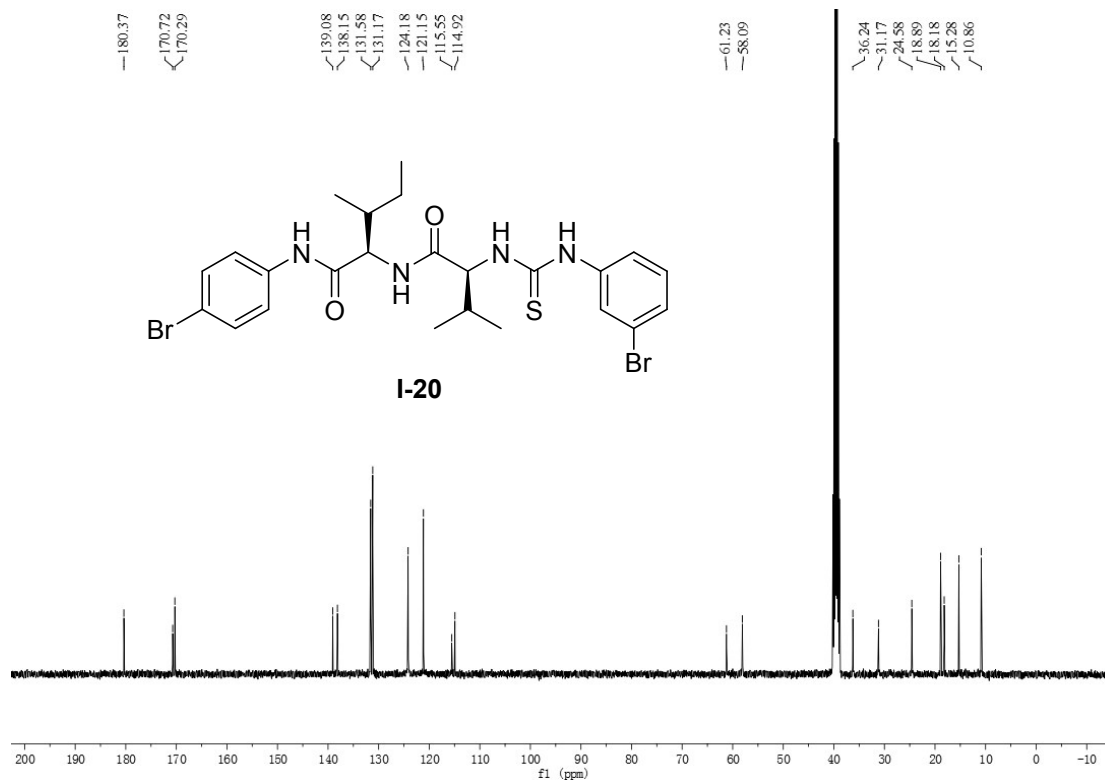

6a #2-36 RT: 0.01-0.12 AV: 35 NL: 2.11E5  
 T: FTMS + p ESI Full lock ms [550.00-700.00]

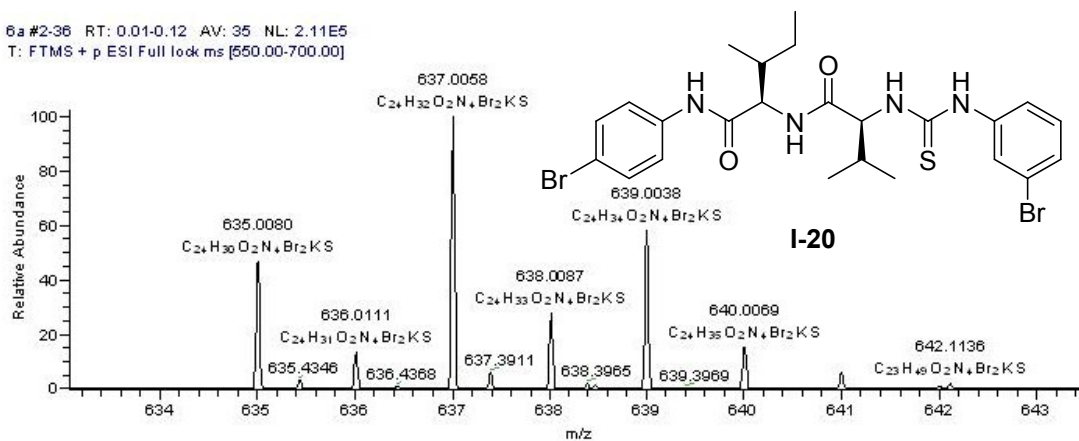

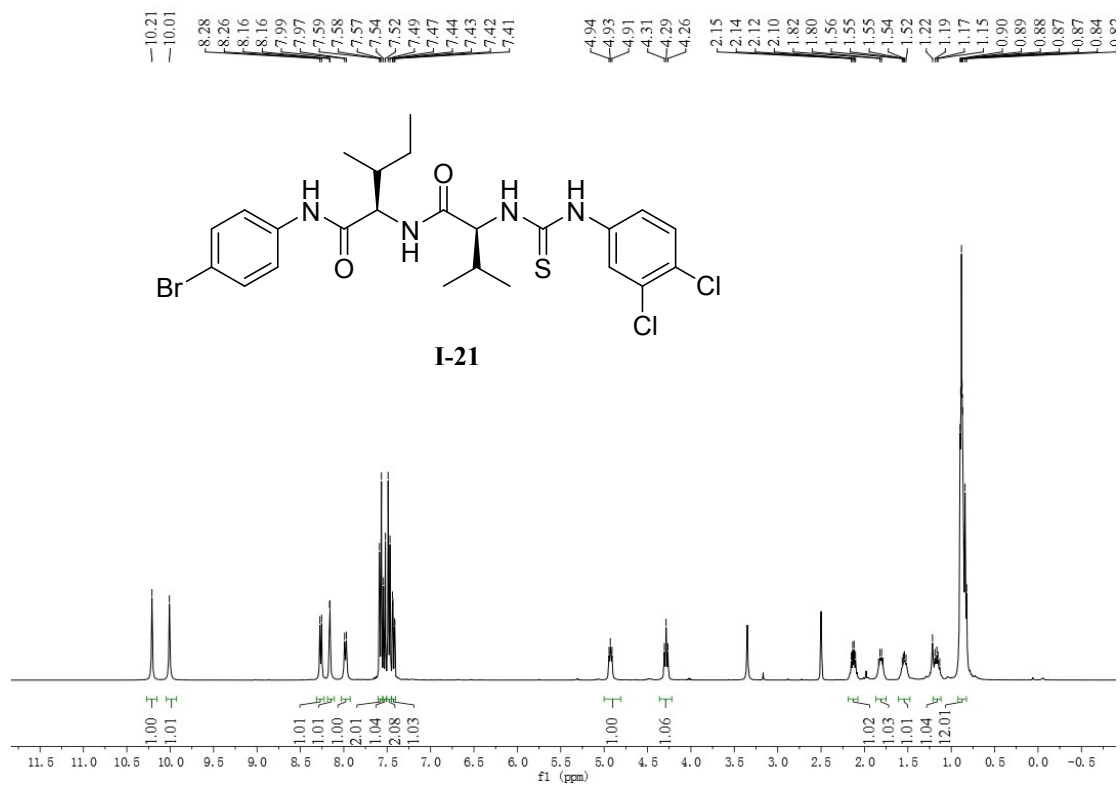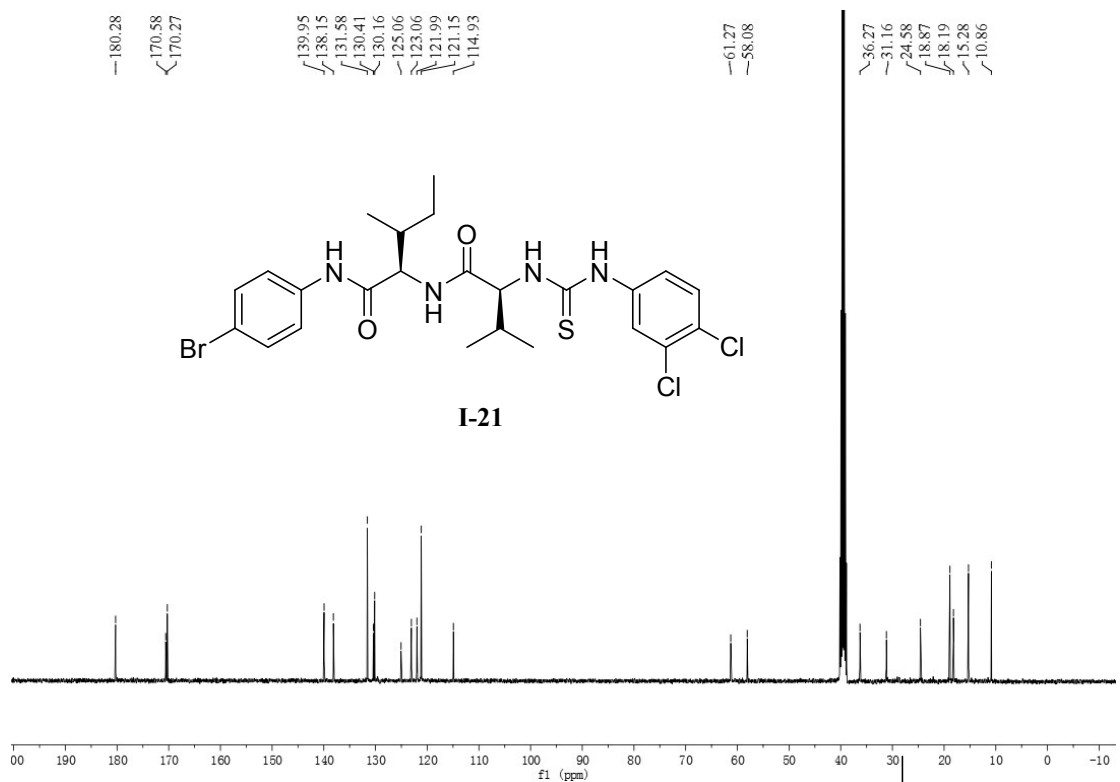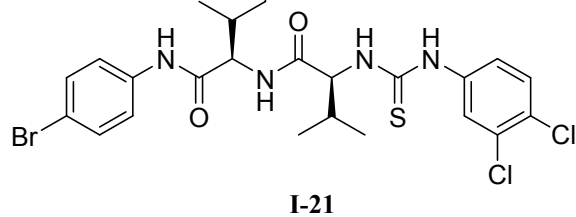

6b #1-29 RT: 0.01-0.10 AV: 29 NL: 1.22E5  
 T: FTMS + p ESI Full lock ms [550.00-700.00]

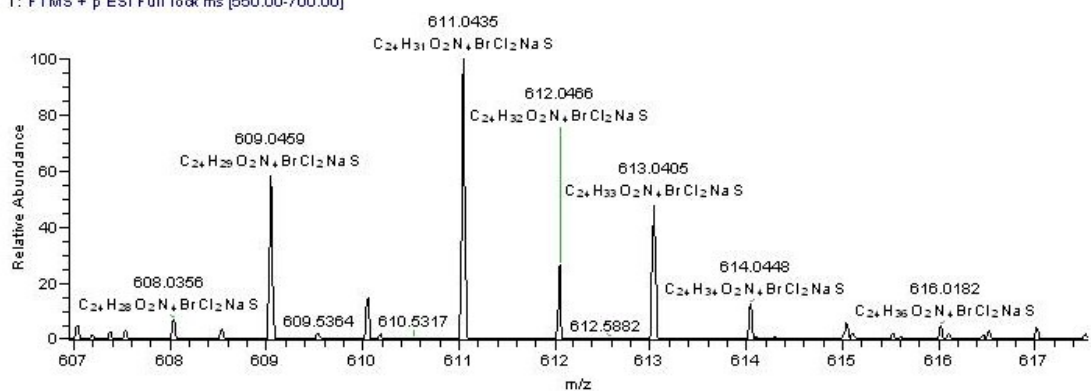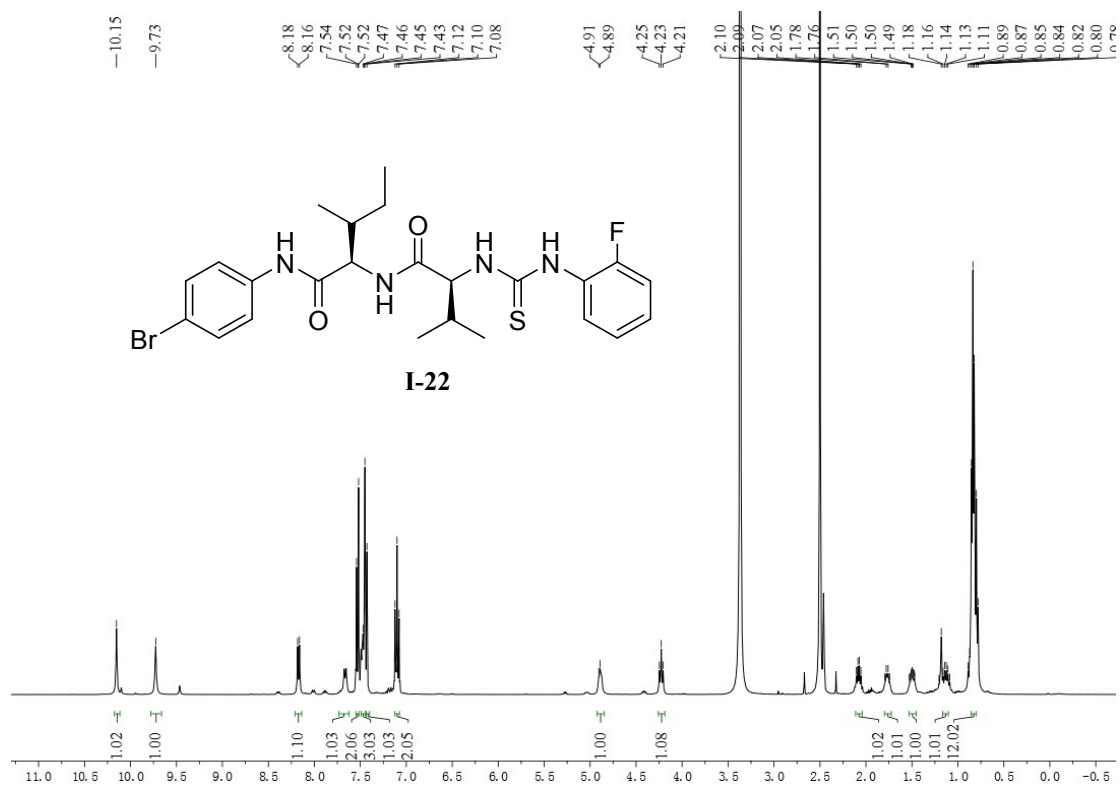

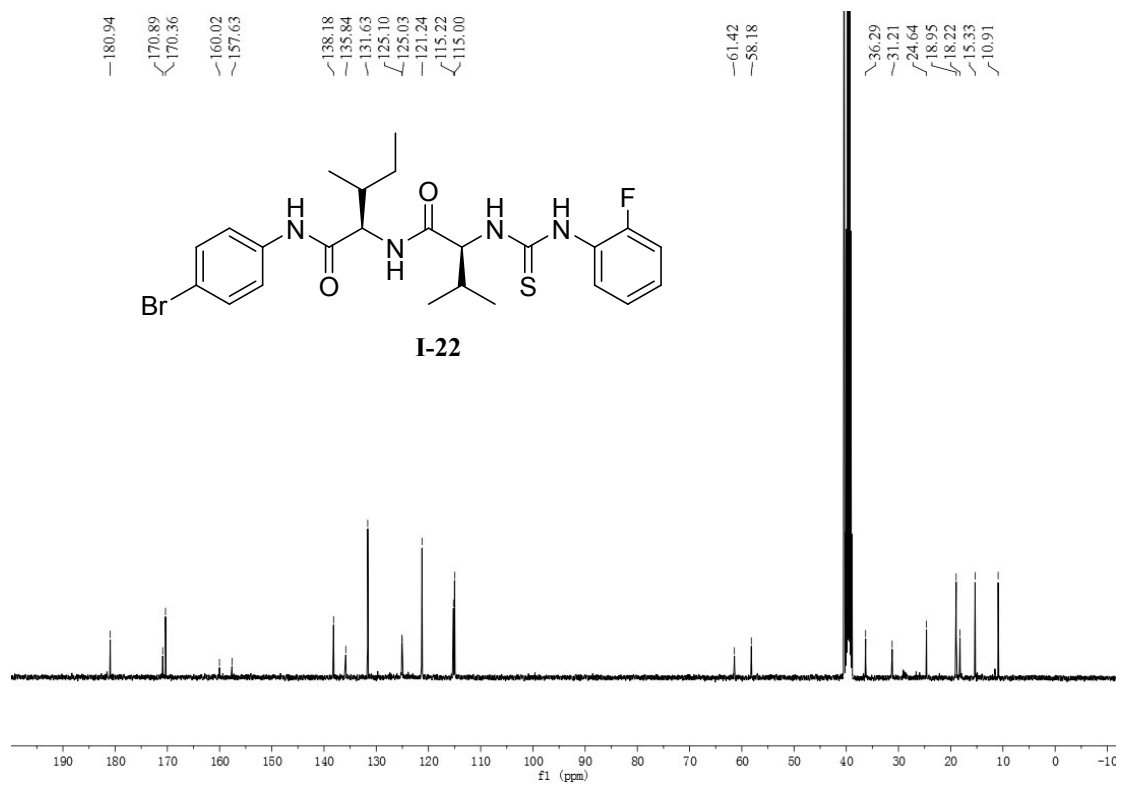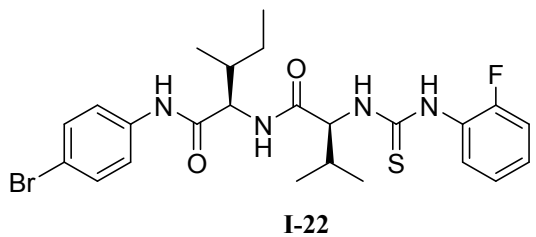

6c#2 RT: 0.01 AV: 1 NL: 6.28E5  
 T: FTMS + p ESI Full lock ms [500.00-800.10]

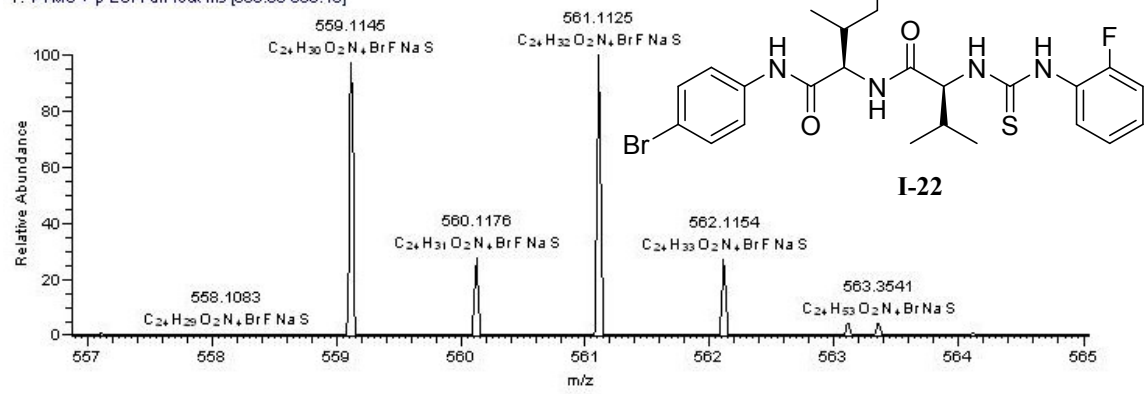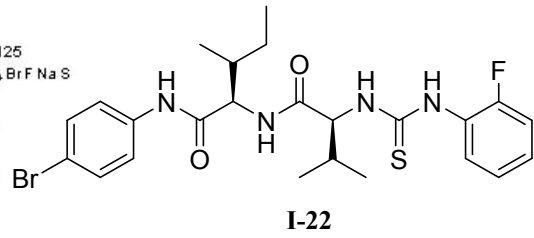

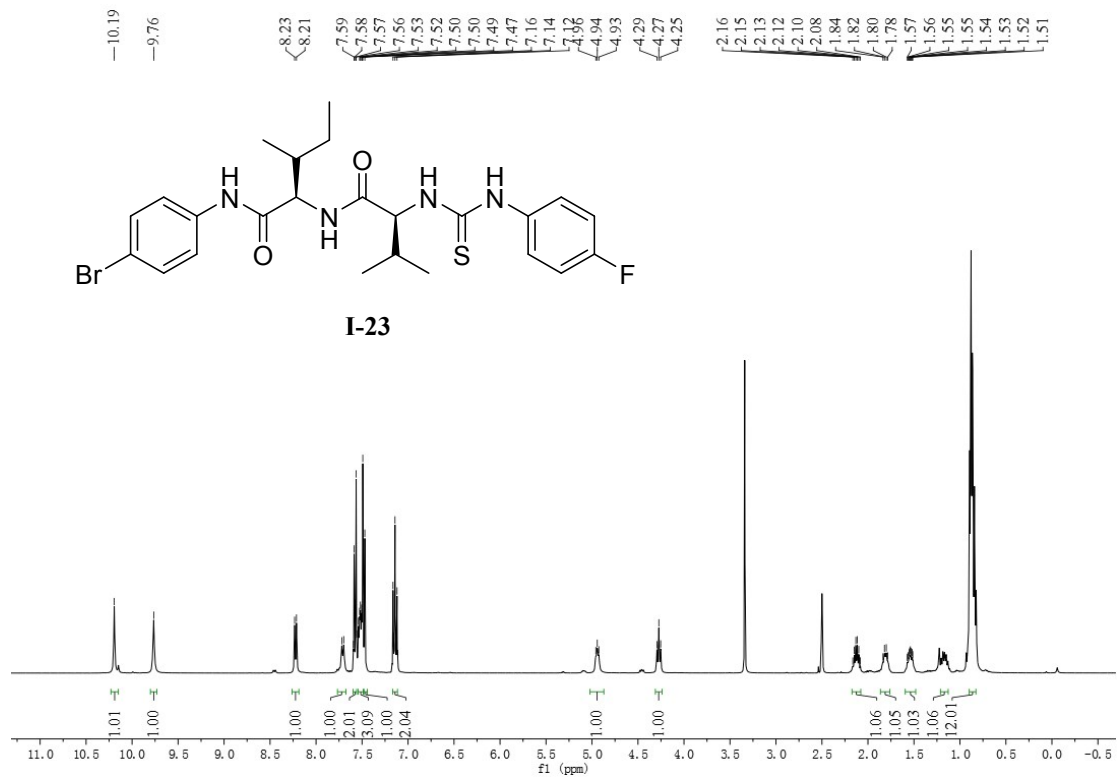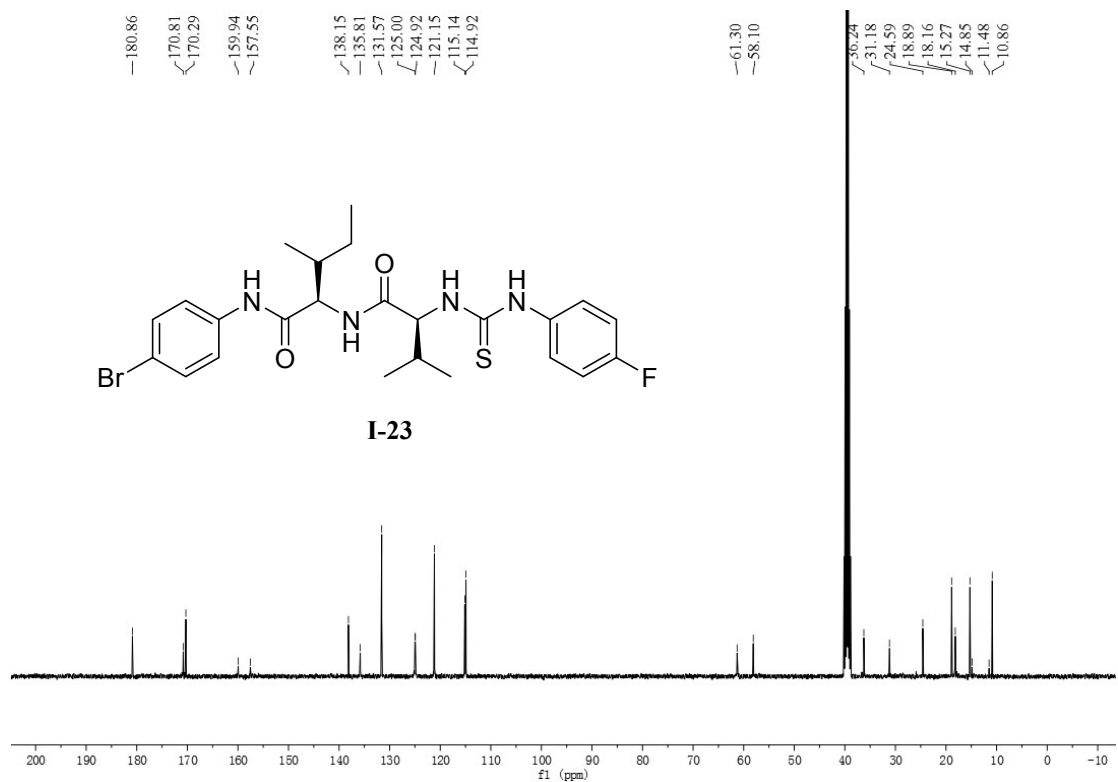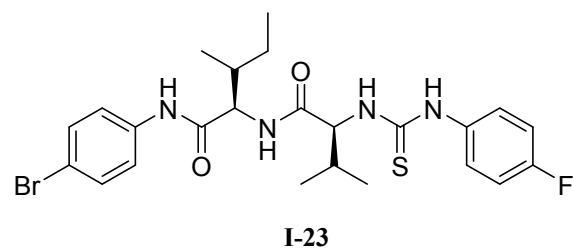

6d #2 RT: 0.01 AV: 1 NL: 4.13E5  
T: FTMS + p ESI Full lock ms [500.00-600.00]

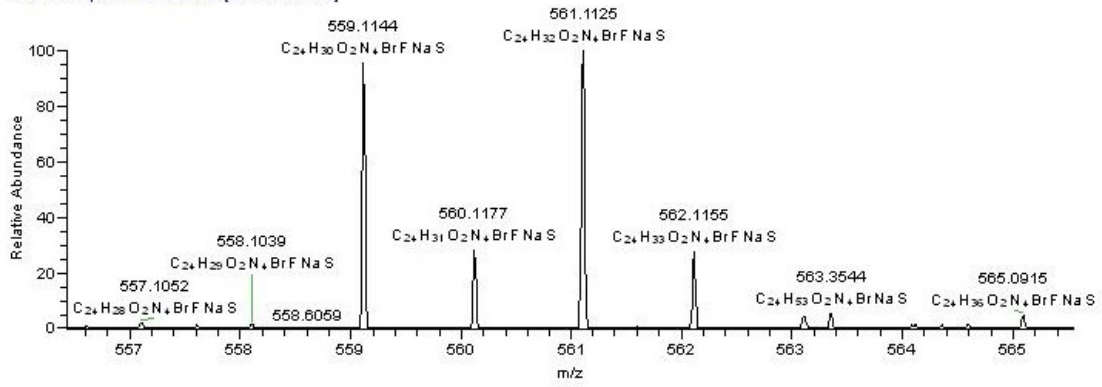

10.29 9.85 8.25 8.23 7.96 7.95 7.94 7.93 7.92 7.91 7.85 7.83 7.61 7.59 7.55 7.54 7.53 7.51 7.49 7.47 7.46 7.38 7.36 5.00 4.98 4.96 4.26 4.24 4.22 2.17 2.16 2.14 2.13 1.83 1.82 1.57 1.56 1.55 1.53 1.22 1.21 1.19 1.17 1.09 0.89 0.88 0.85 0.84

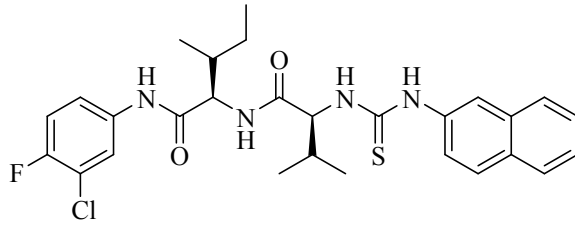

I-24

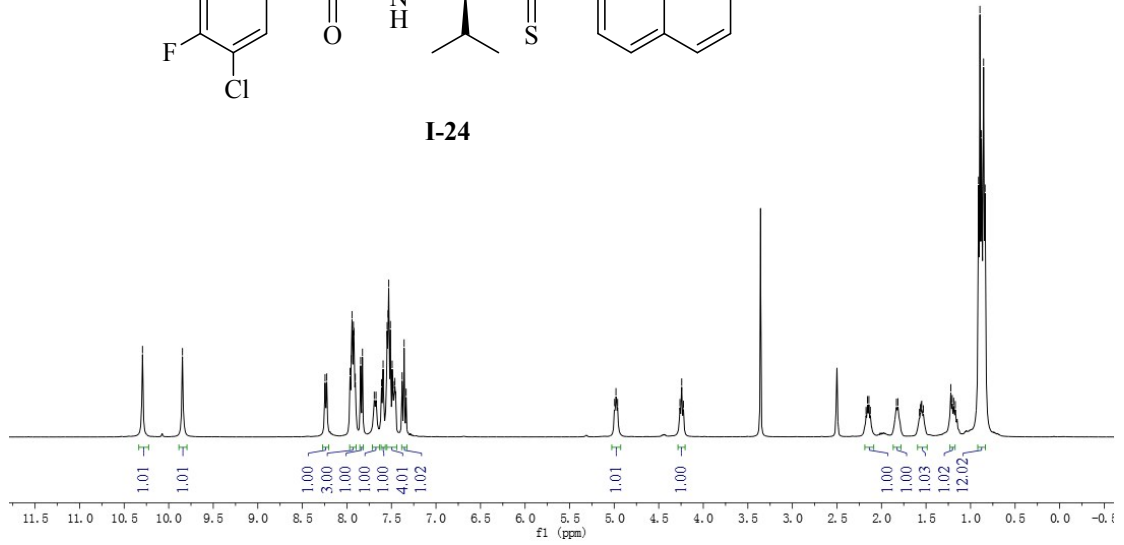

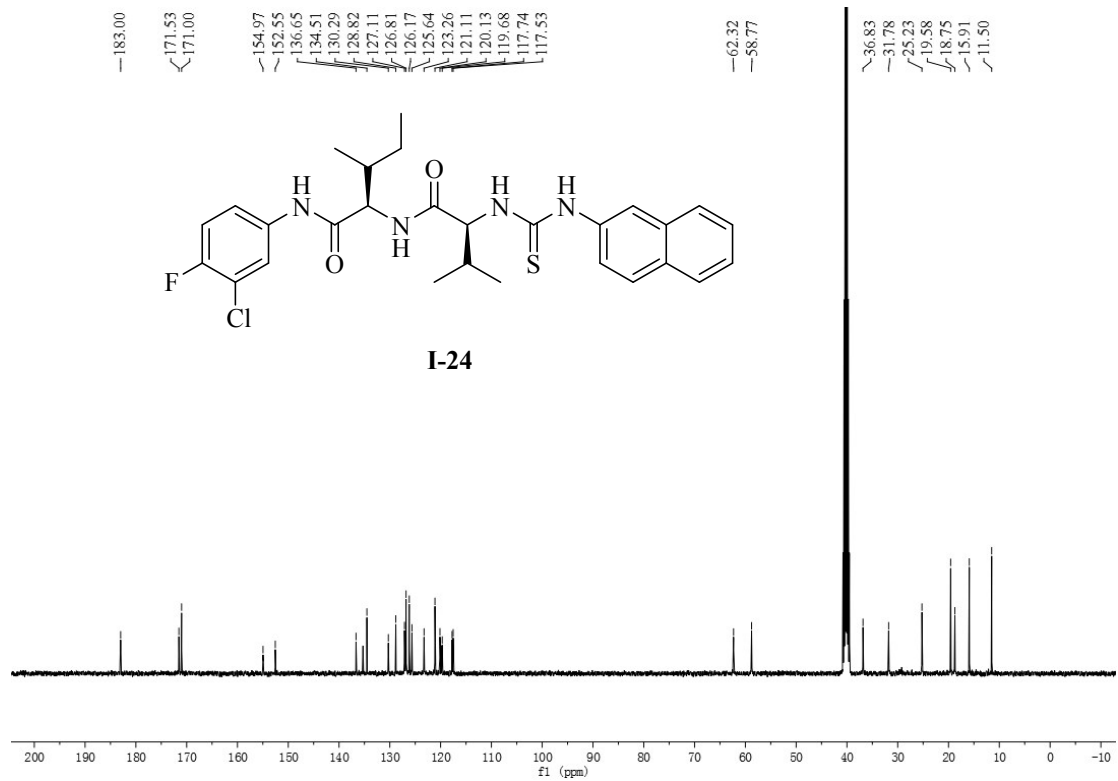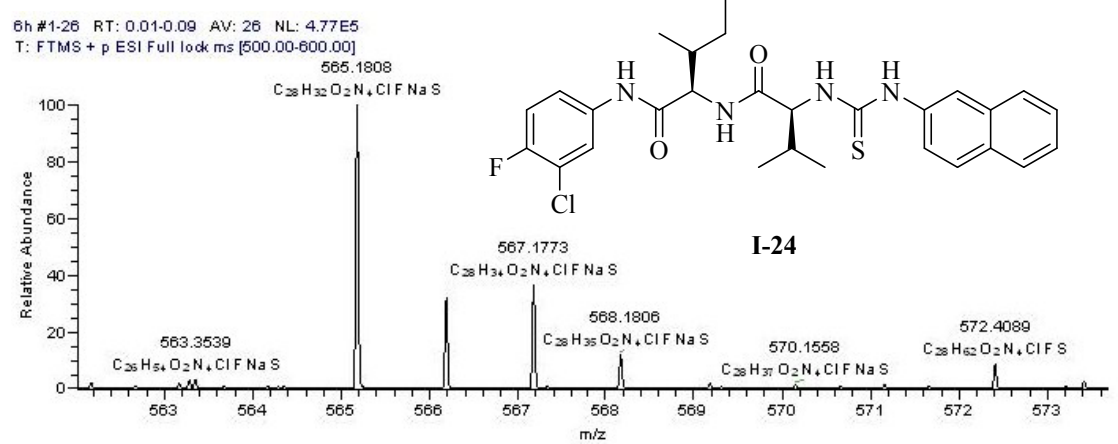

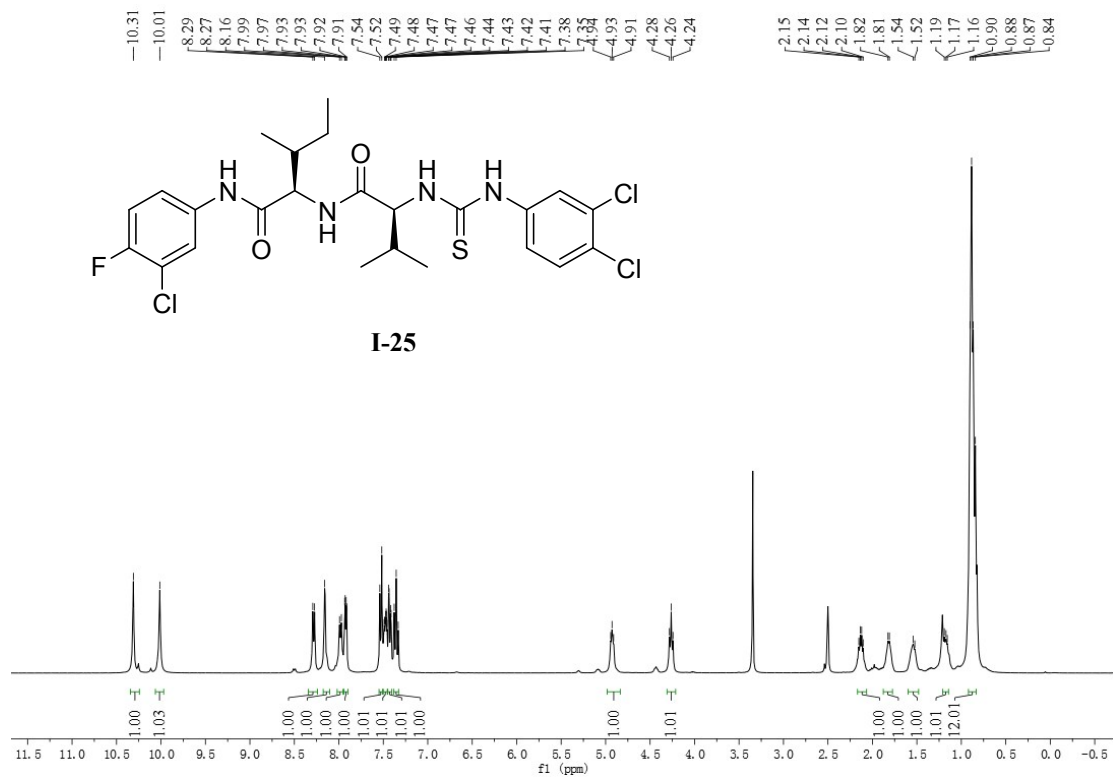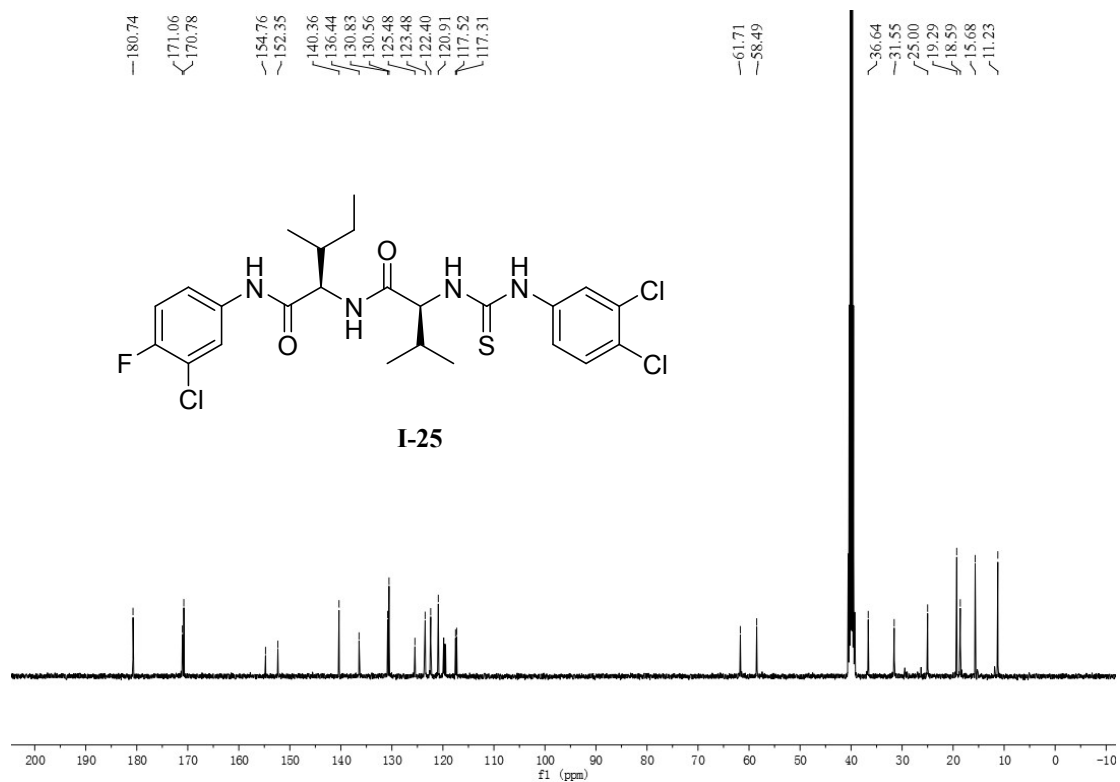



6j #1-19 RT: 0.01-0.07 AV: 19 NL: 2.30E5  
T: FTMS + p ESI Full lock ms [500.00-620.00]

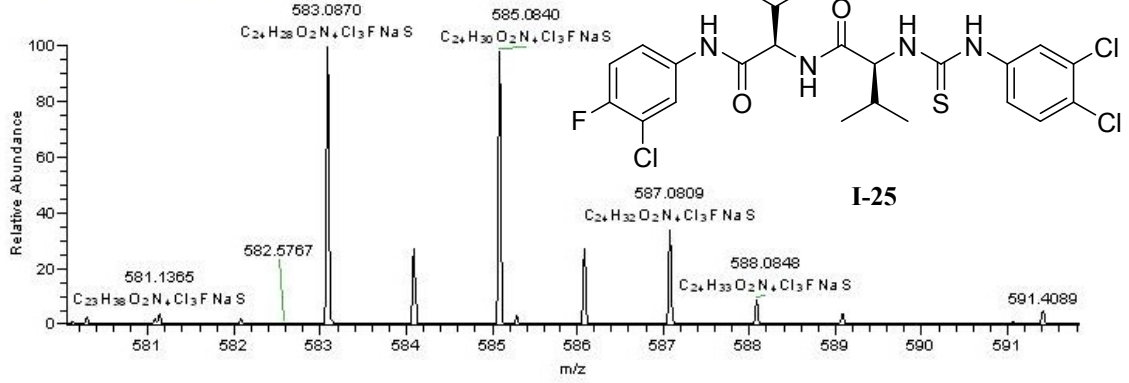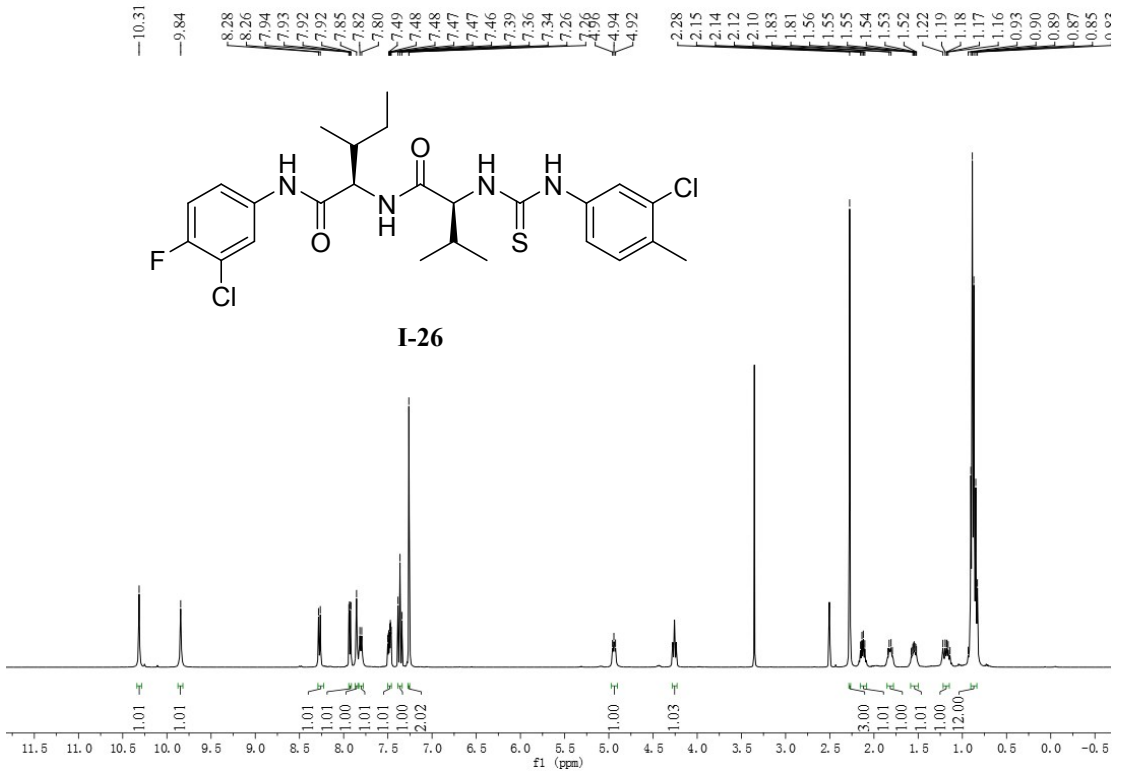

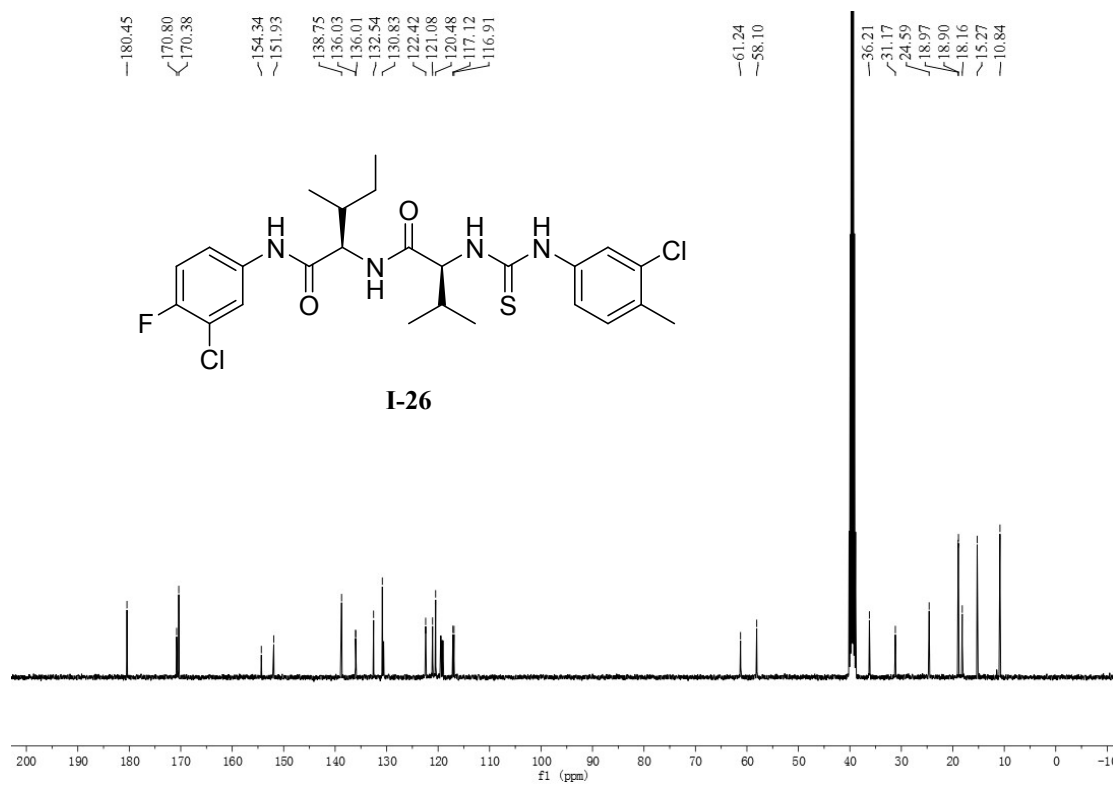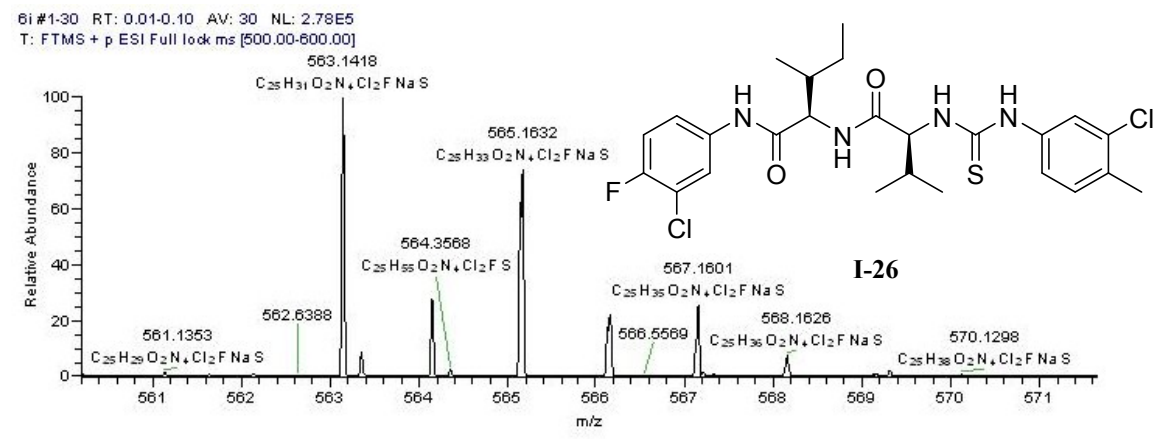

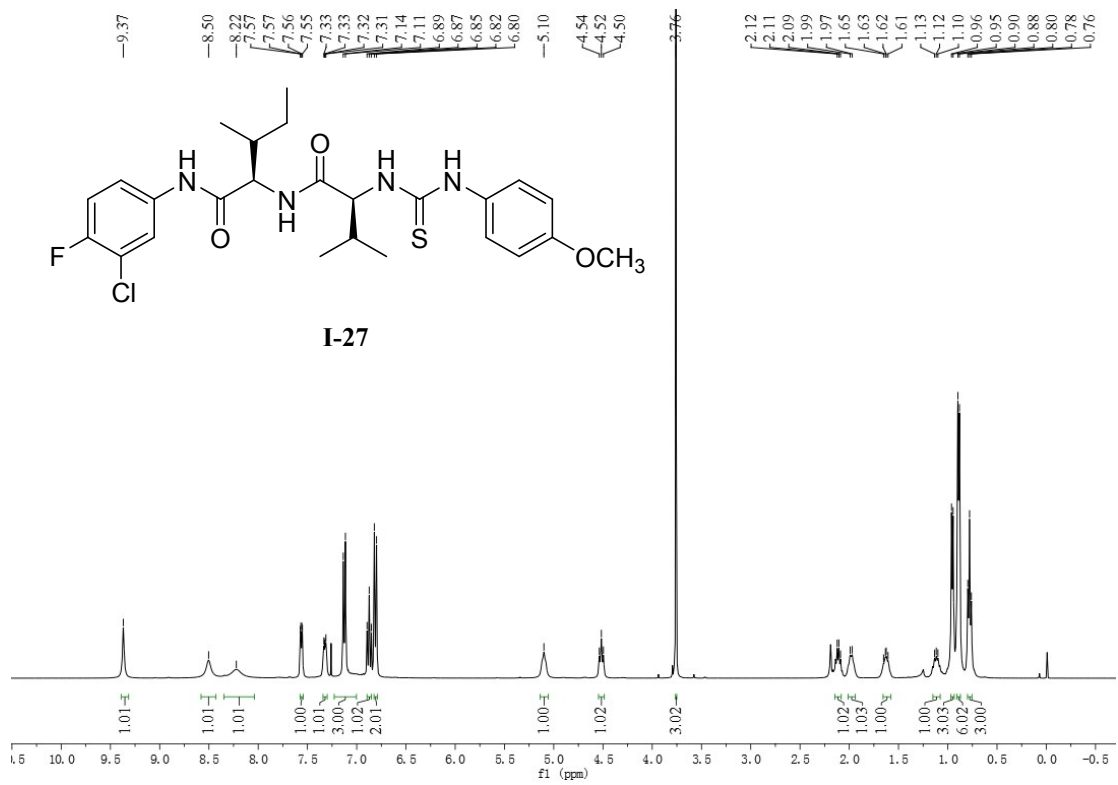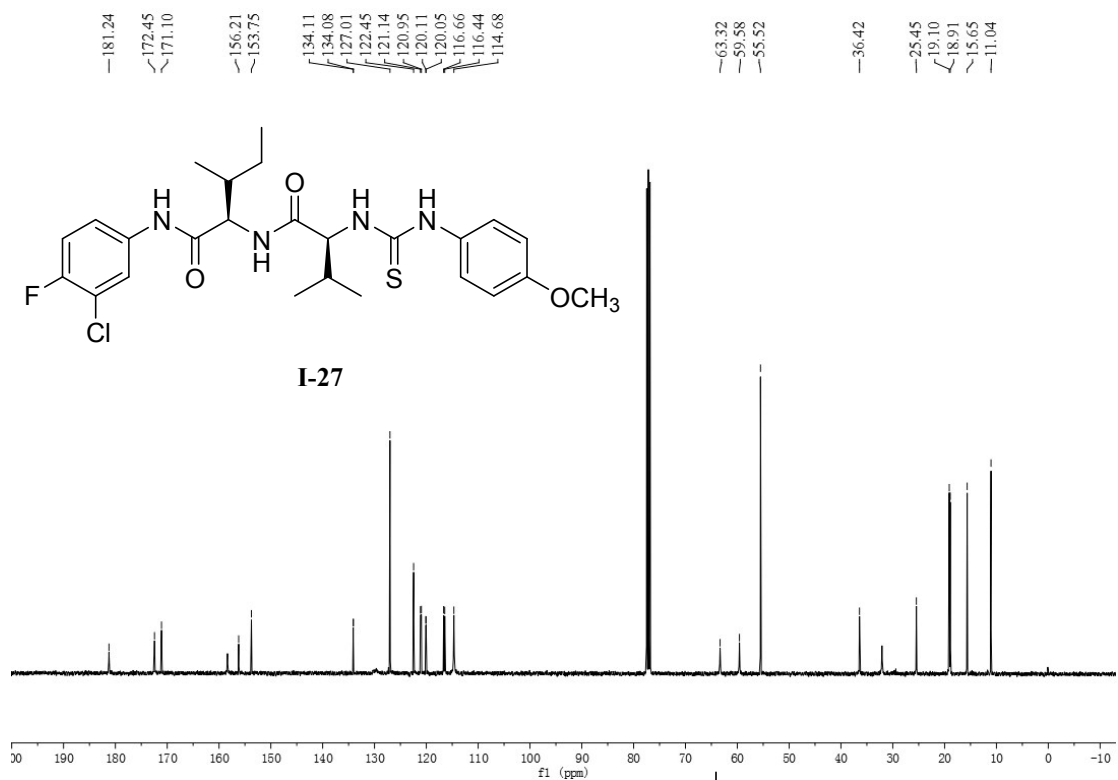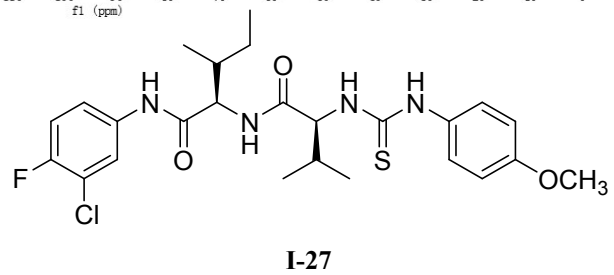

6m #2-35 RT: 0.01-0.12 AV: 34 NL: 5.16E5  
 T: FTMS + p ESI Full lock ms [500.00-600.10]

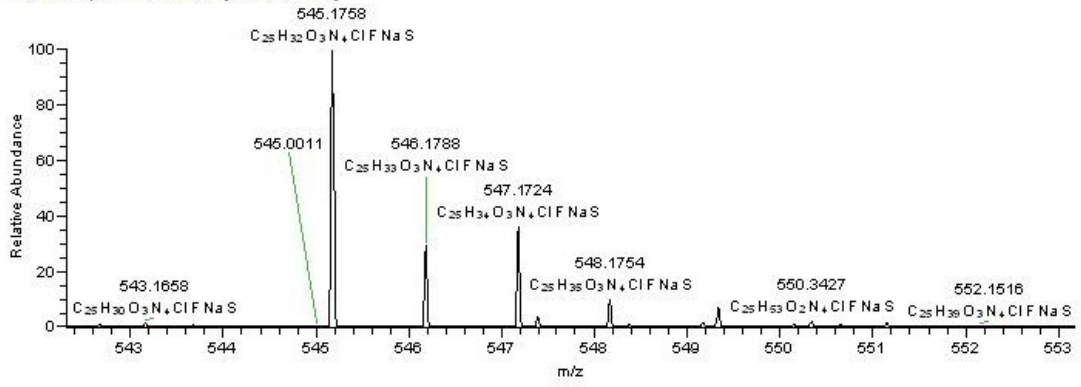

Chemical shift values (ppm) for the 1H NMR spectrum: 10.21, 9.00, 8.86, 7.90, 7.84, 7.73, 7.72, 7.60, 7.58, 6.94, 6.64, 6.63, 6.62, 6.61, 5.02, 5.01, 4.99, 4.45, 4.43, 4.41, 3.77, 3.75, 3.68, 2.22, 2.21, 1.92, 1.90, 1.54, 1.53, 1.52, 1.51, 1.50, 1.22, 0.96, 0.94, 0.92, 0.90, 0.87, 0.85, 0.83.

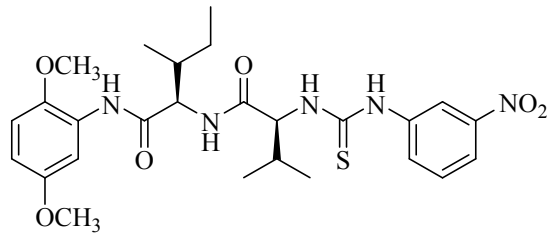

**I-28**

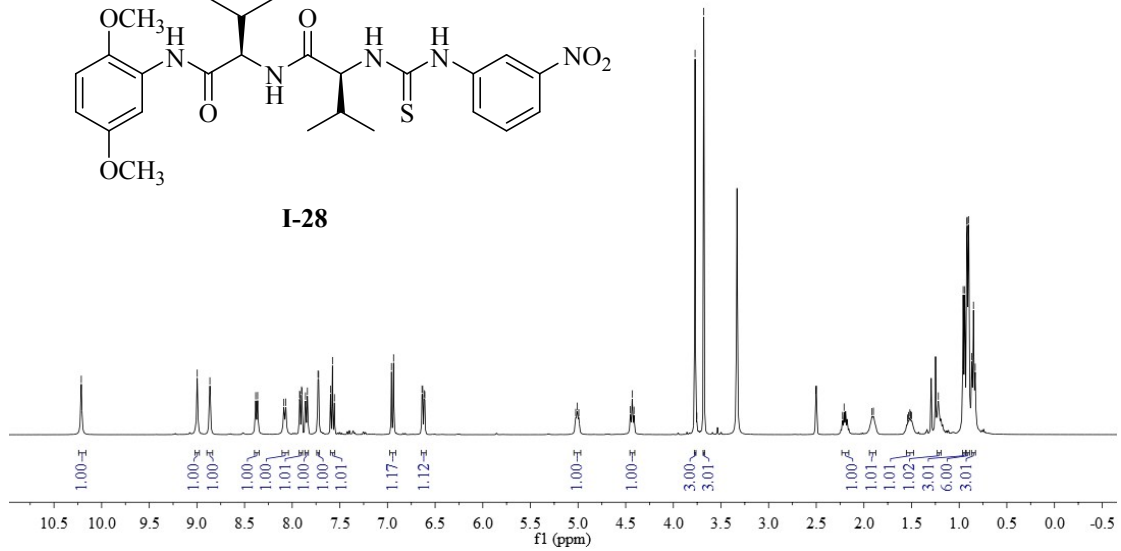

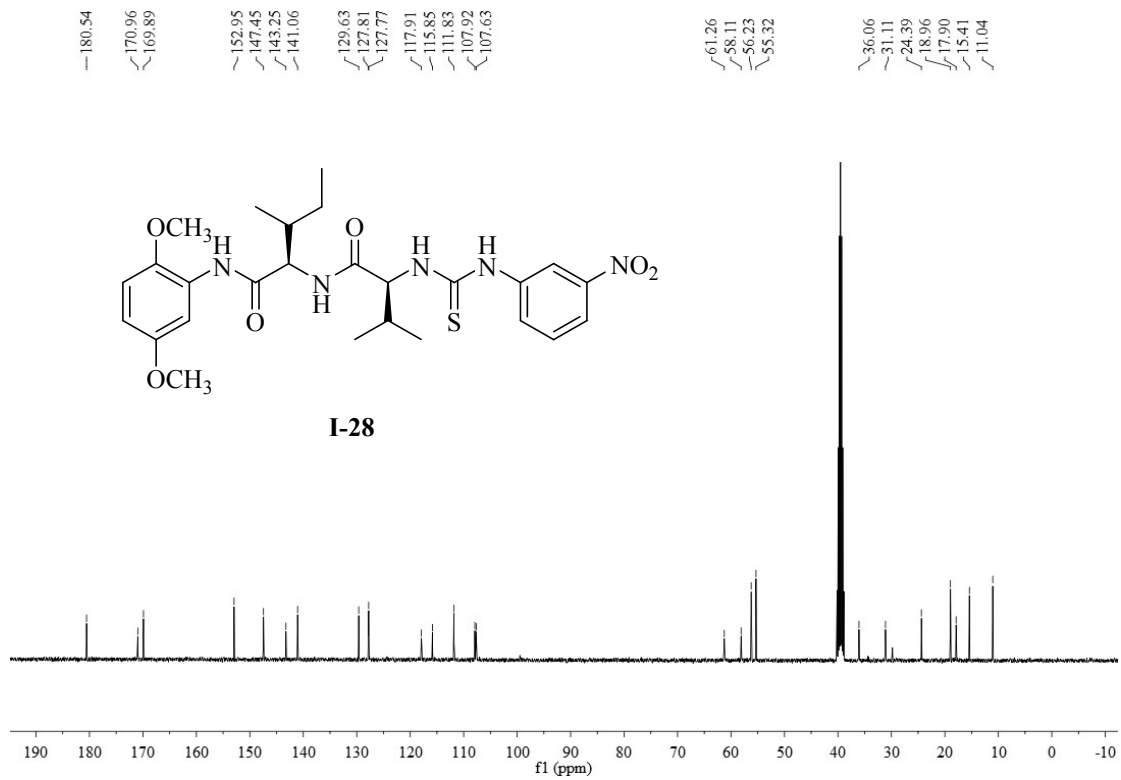

T: FTMS - p ESI Full ms [530.00-570.10]

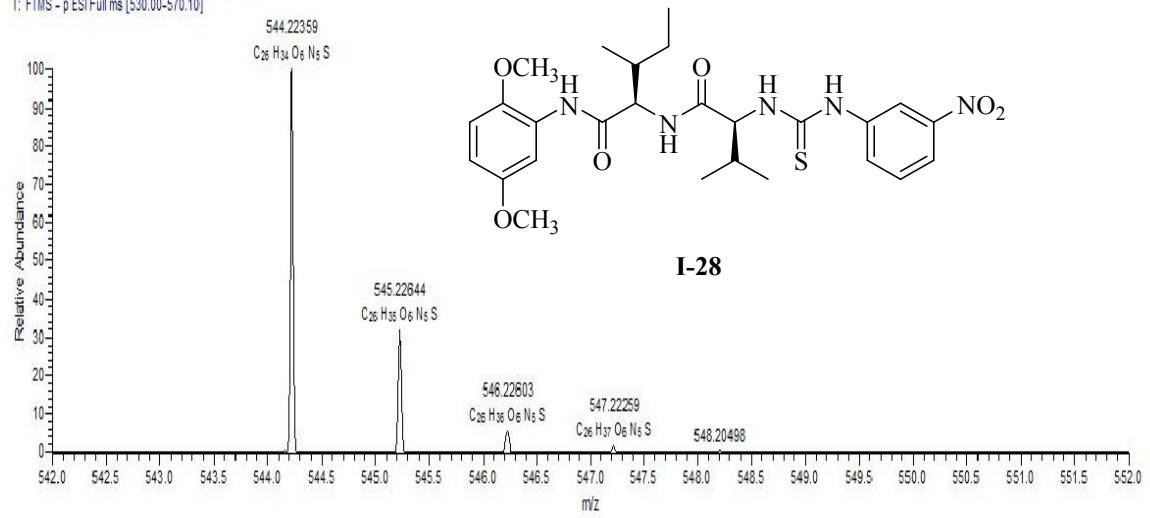

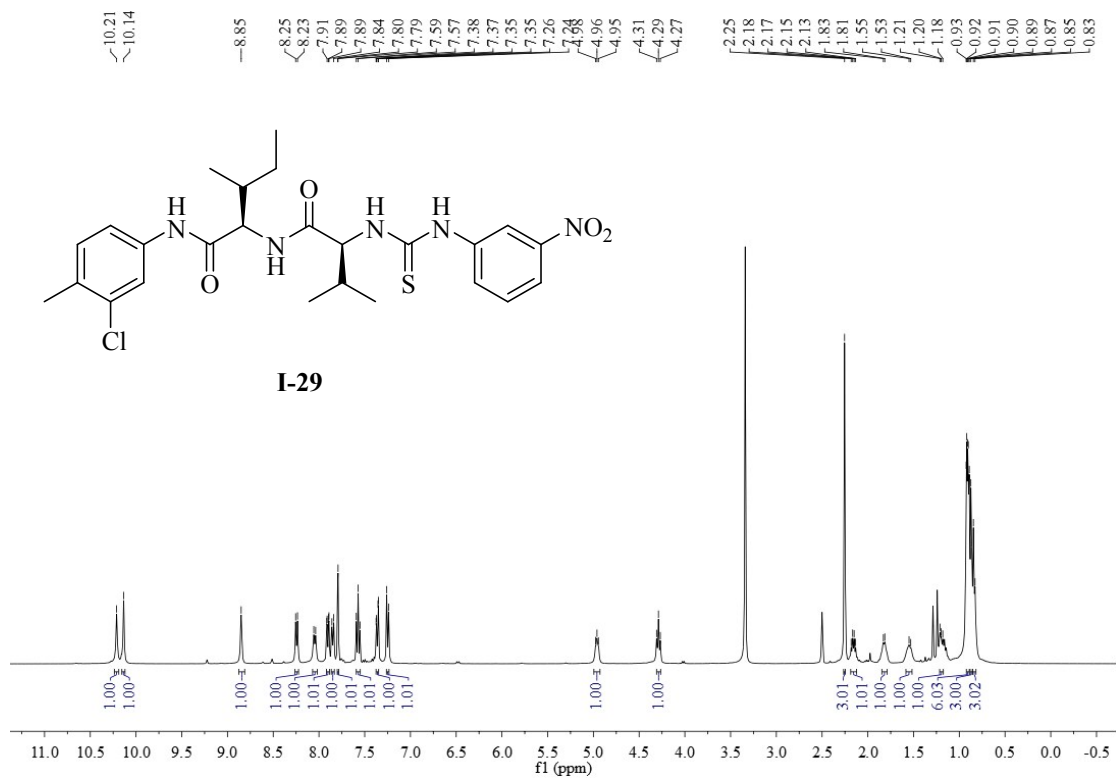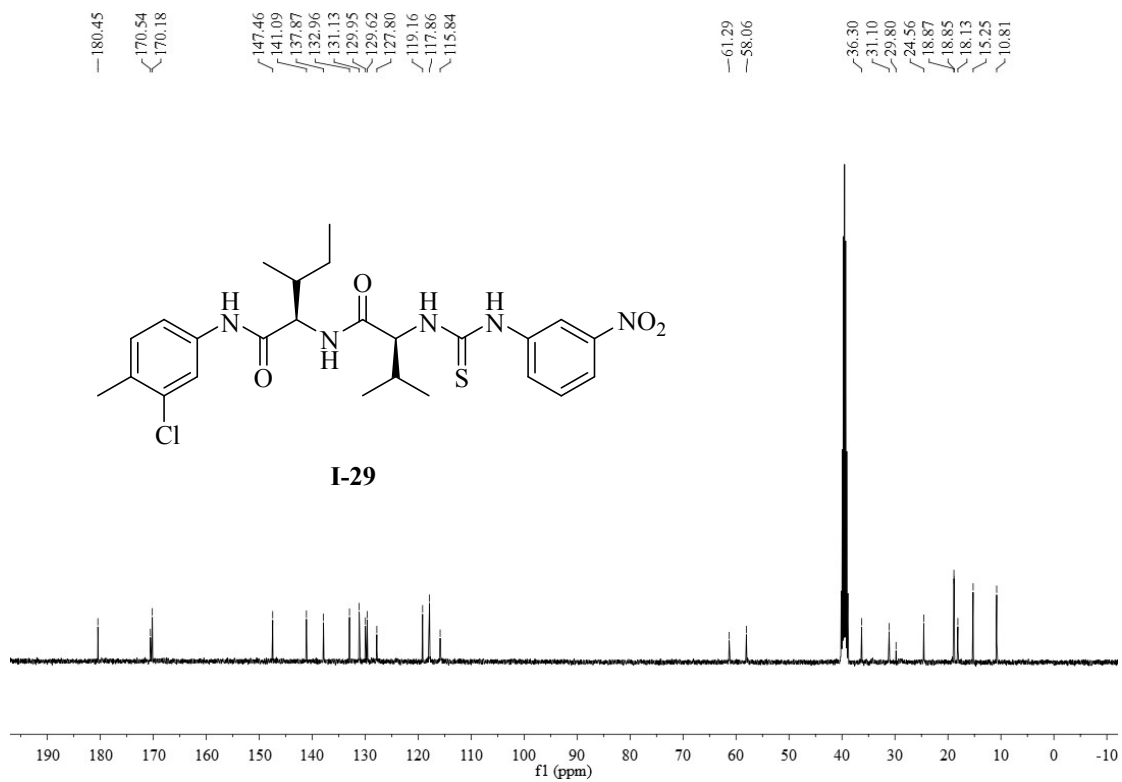

T: FTMS - p ESI Full ms [520.00-550.10]

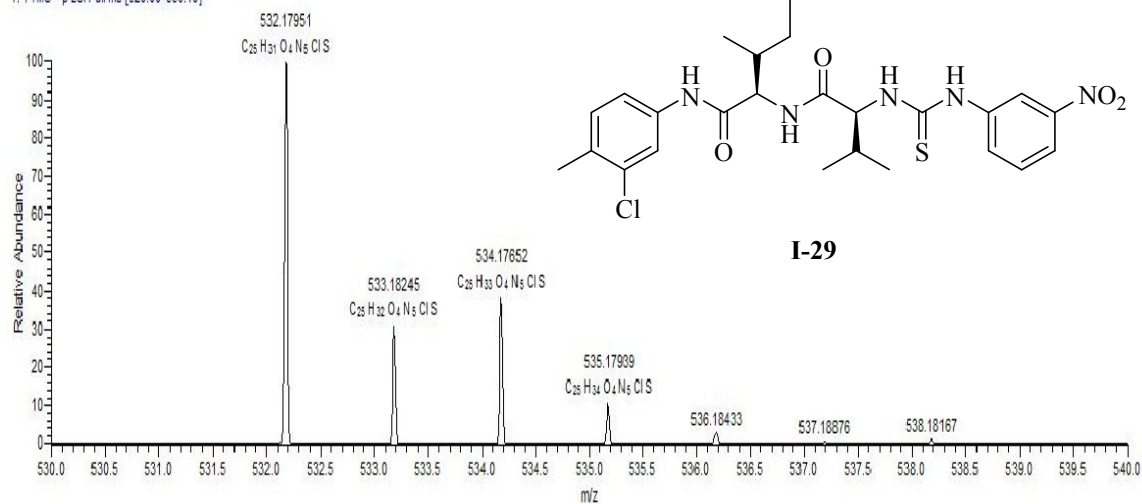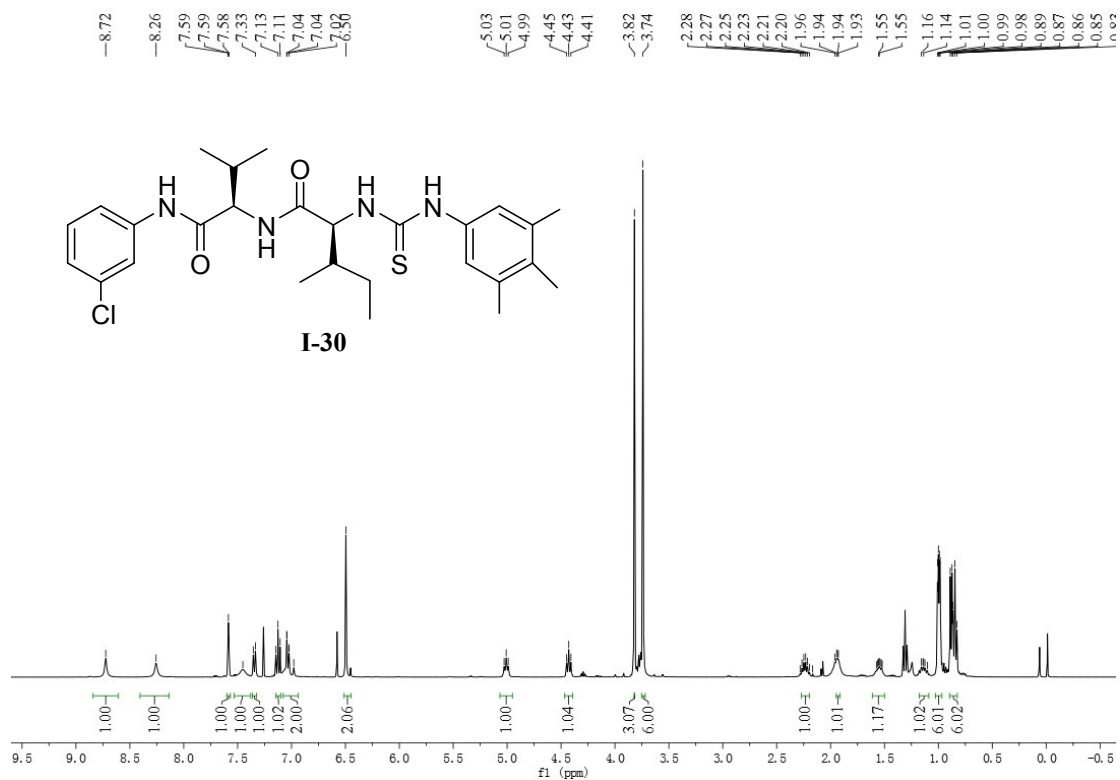

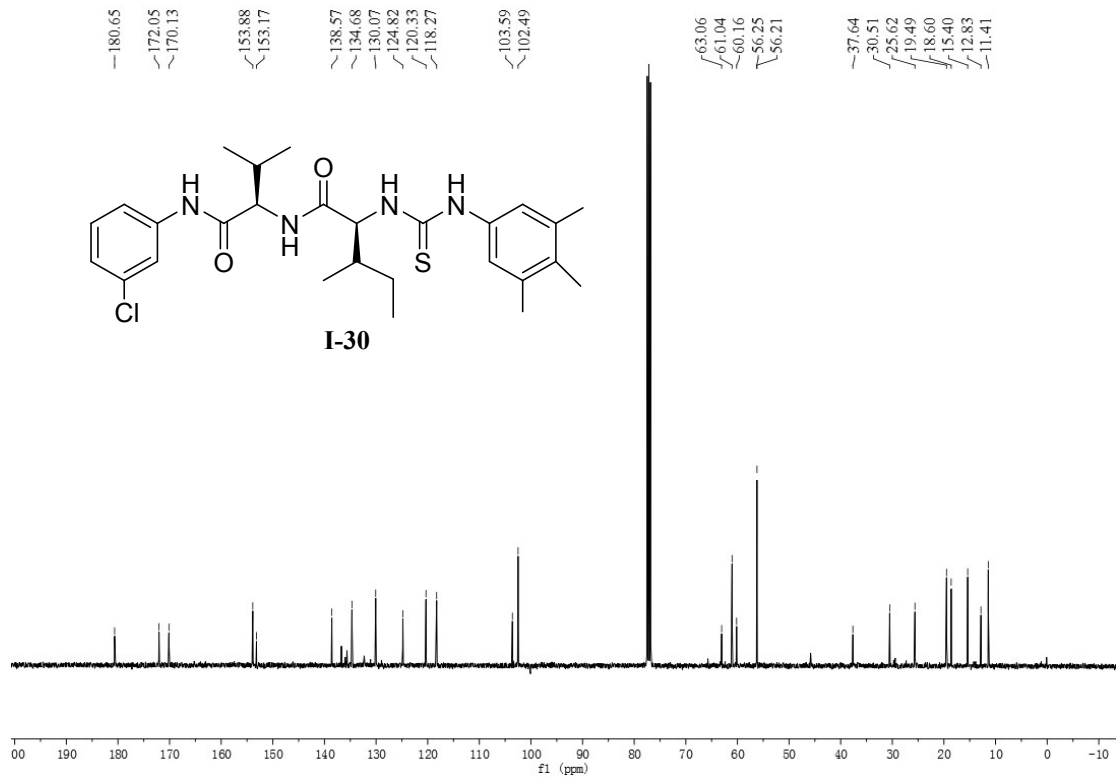

6e #1 RT: 0.01 AV: 1 NL: 1.12E4  
 T: FTMS + p ESI Full lock ms [500.00-600.00]

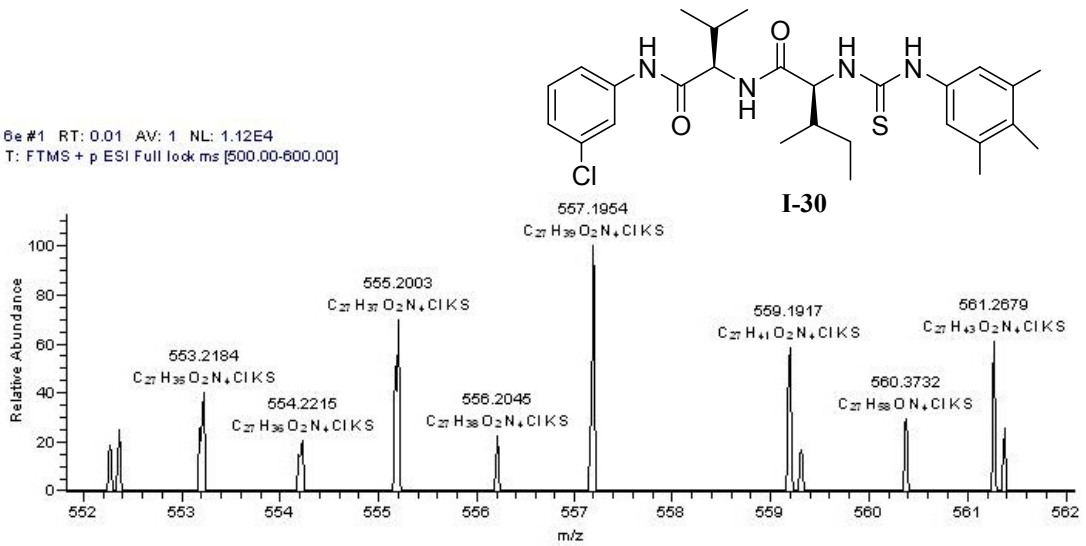



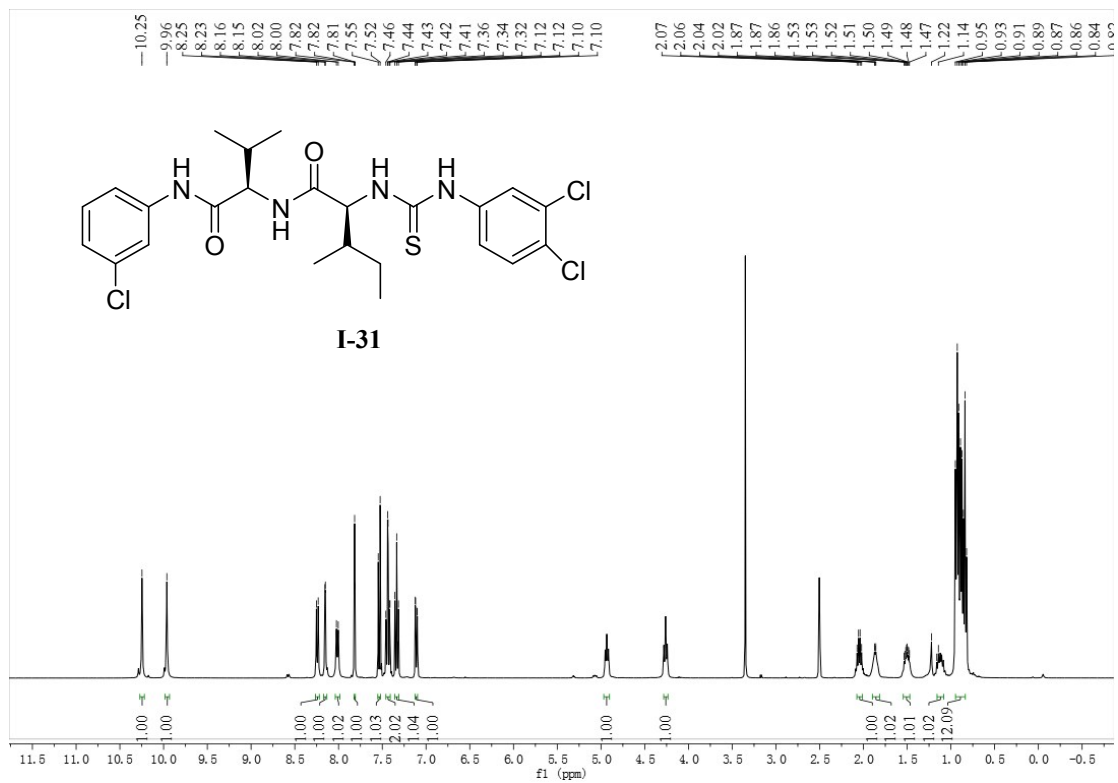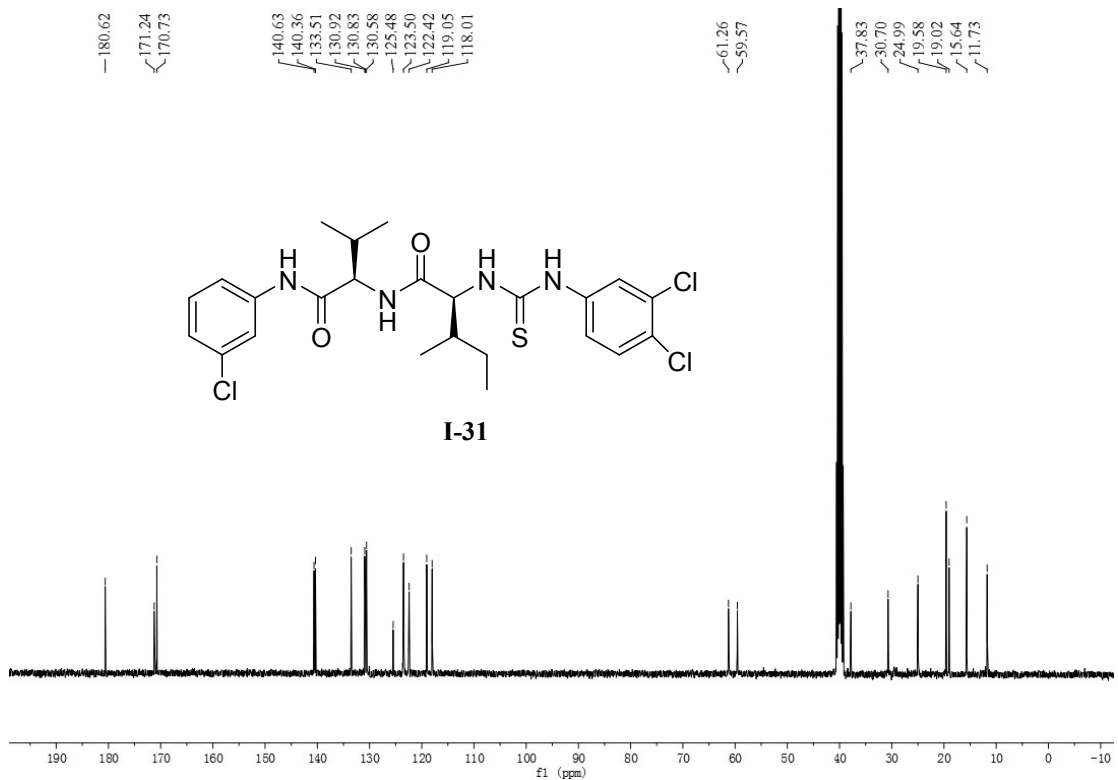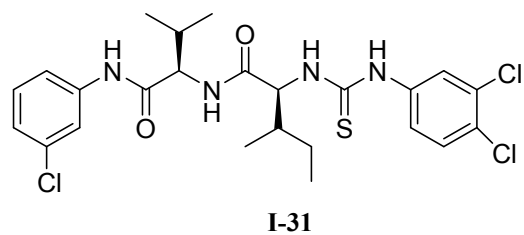

6f#2 RT: 0.01 AV: 1 NL: 2.26E5  
 T: FTMS + p ESI Full lock ms [500.00-600.10]

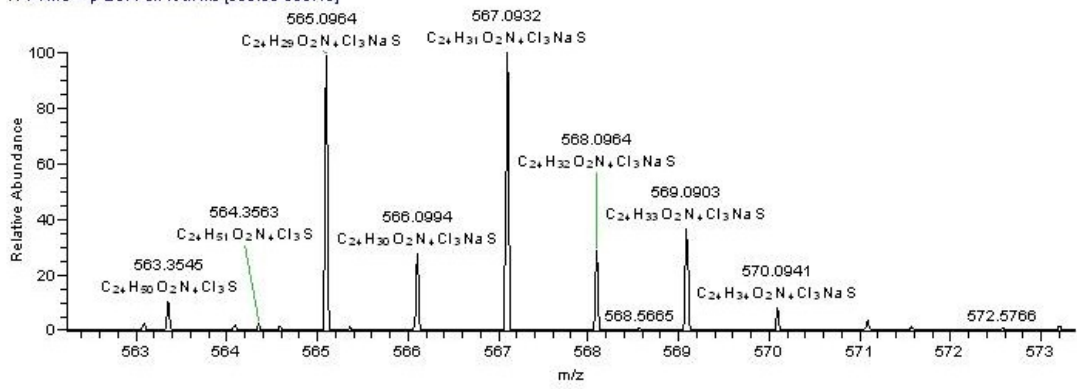

-9.30  
 -8.93  
 7.99  
 7.66  
 7.55  
 7.49  
 7.48  
 7.39  
 7.37  
 7.34  
 7.32  
 7.30  
 7.29  
 7.07  
 7.05  
 -5.27  
 -4.67  
 2.25  
 1.89  
 1.65  
 1.26  
 1.06  
 1.05  
 1.03  
 0.88  
 0.87  
 0.81  
 0.79  
 0.78

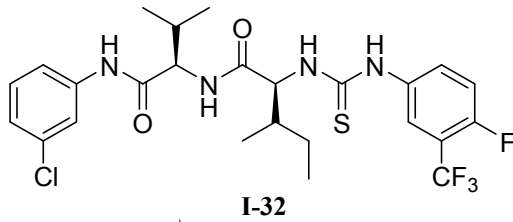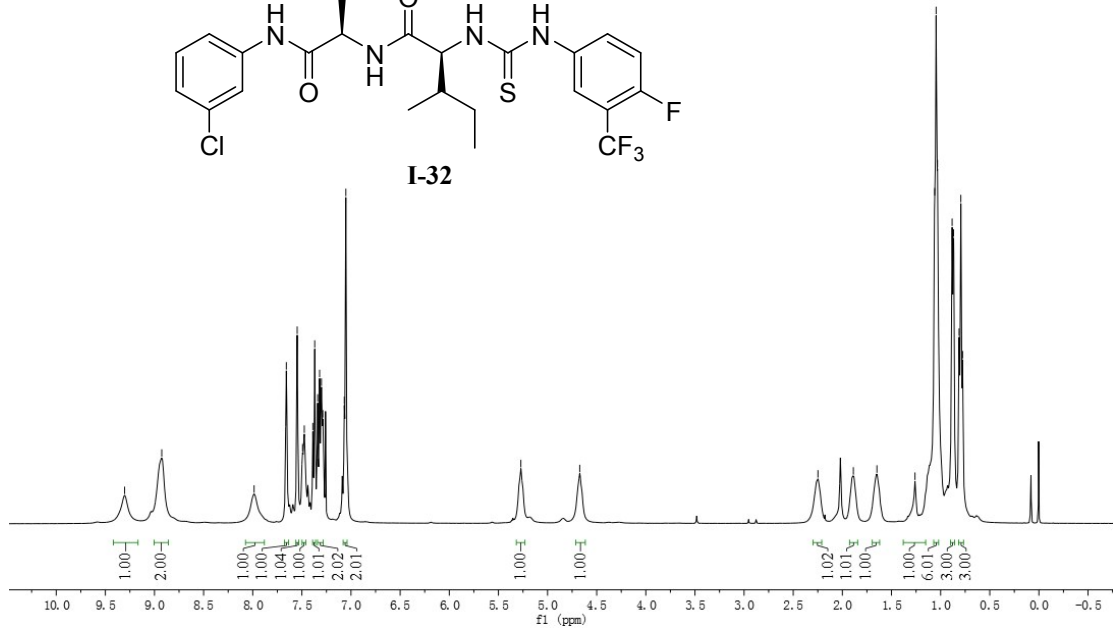

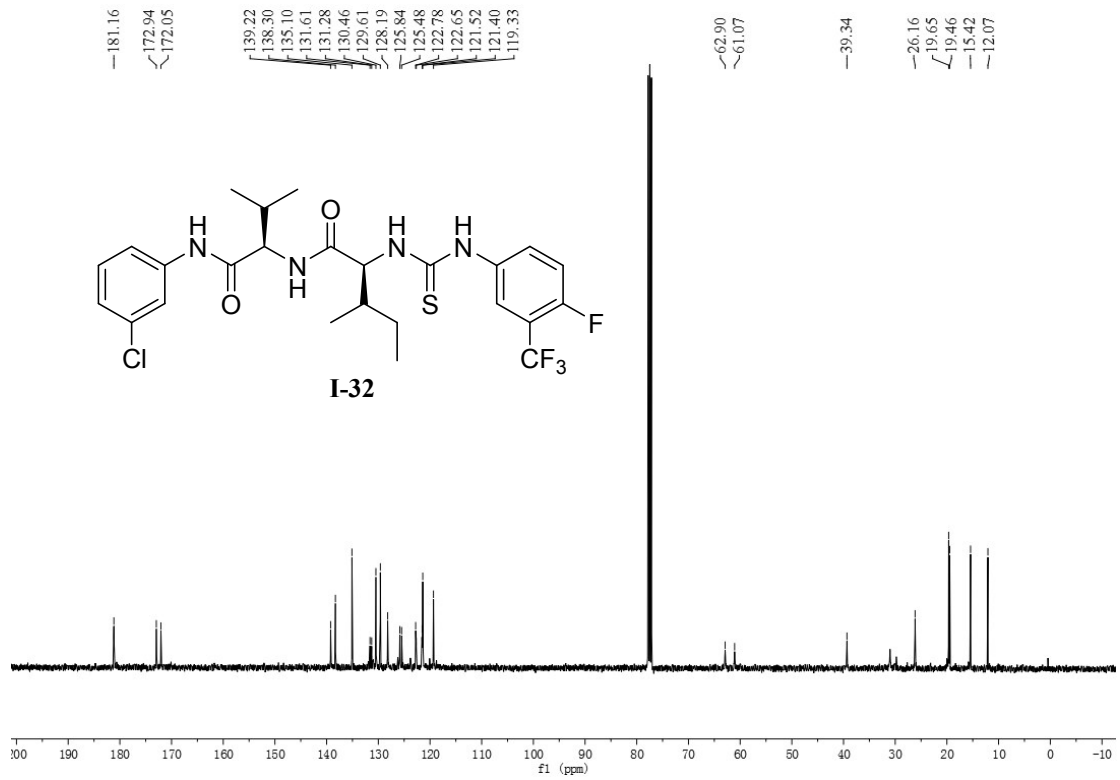

6g #2 RT: 0.01 AV: 1 NL: 1.37E5  
 T: FTMS + p ESI Full lock ms [500.00-650.00]

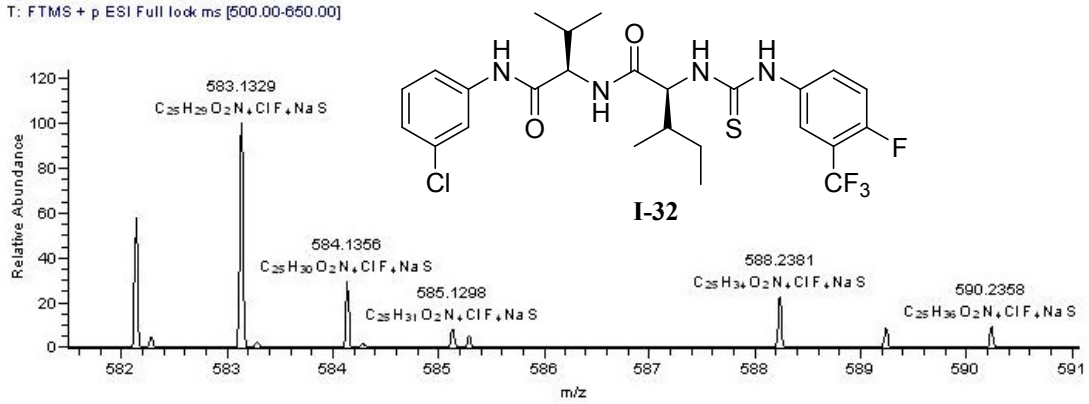

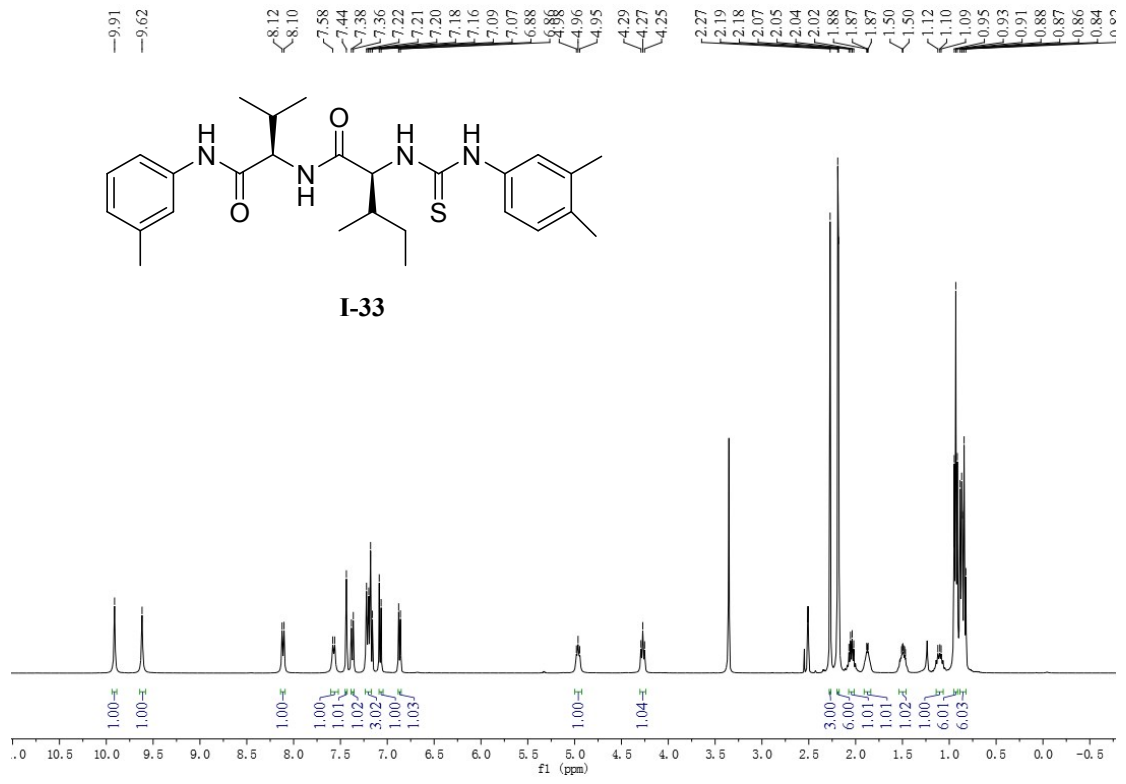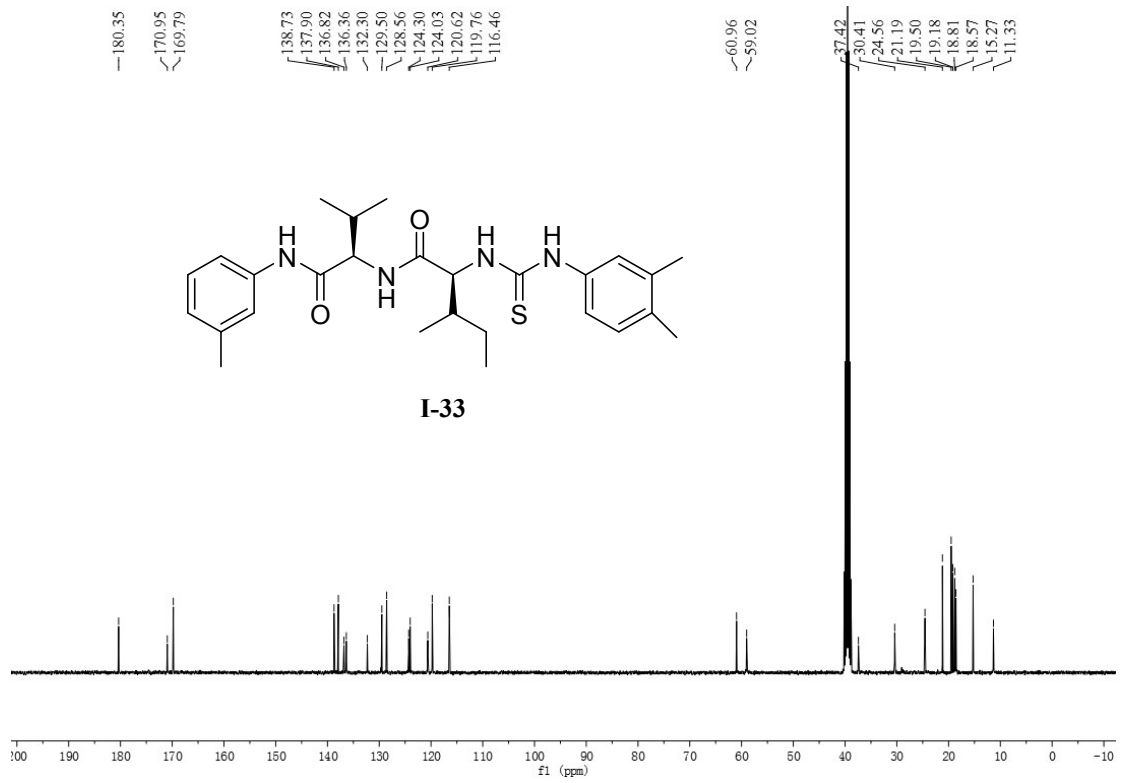

6n #1-36 RT: 0.01-0.12 AV: 36 NL: 1.38E6  
T: FTMS + p ESI Full lock ms [450.00-550.00]

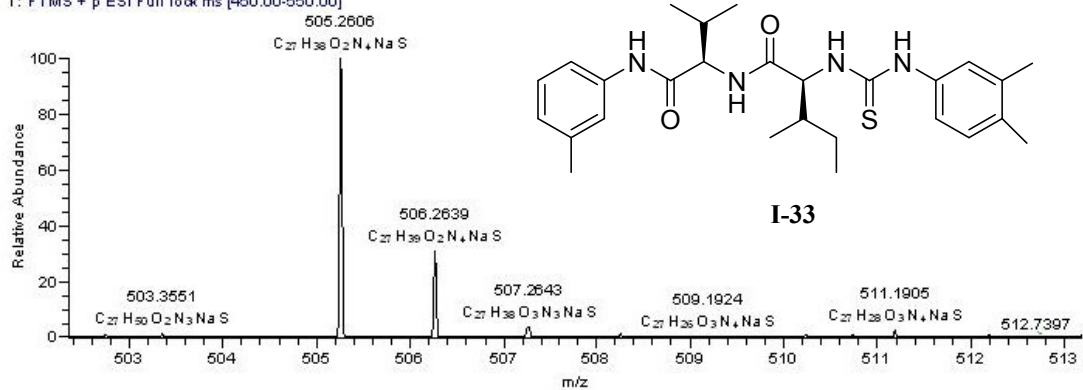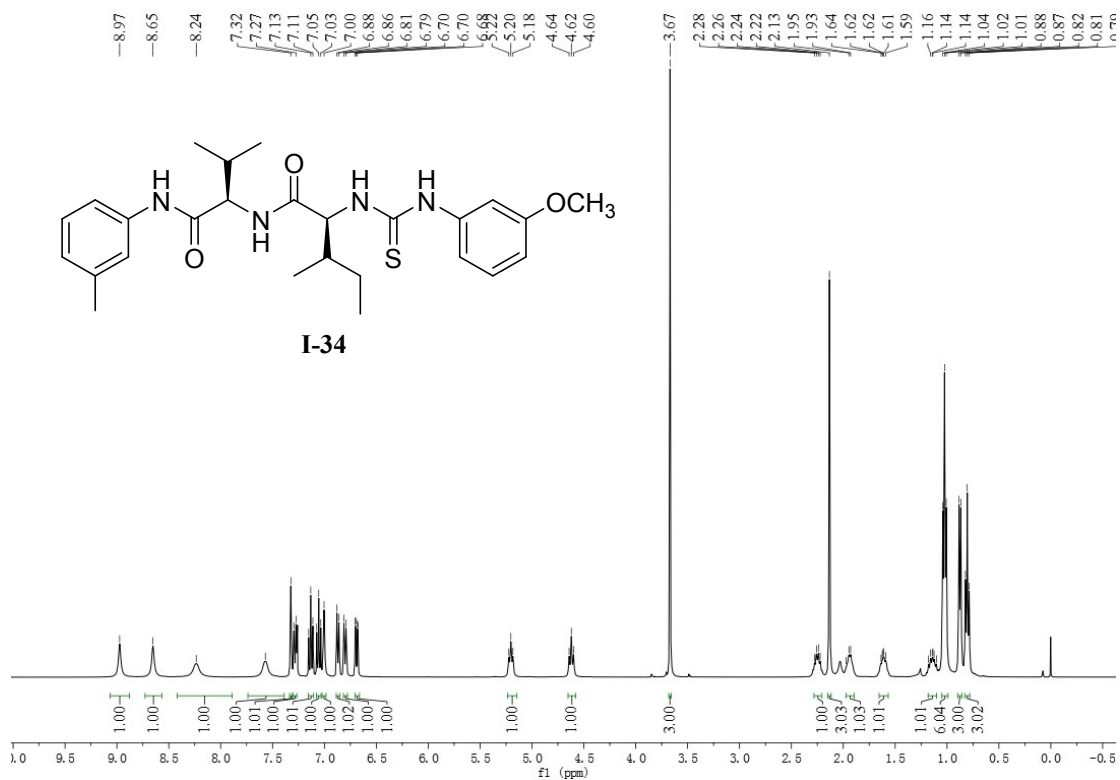

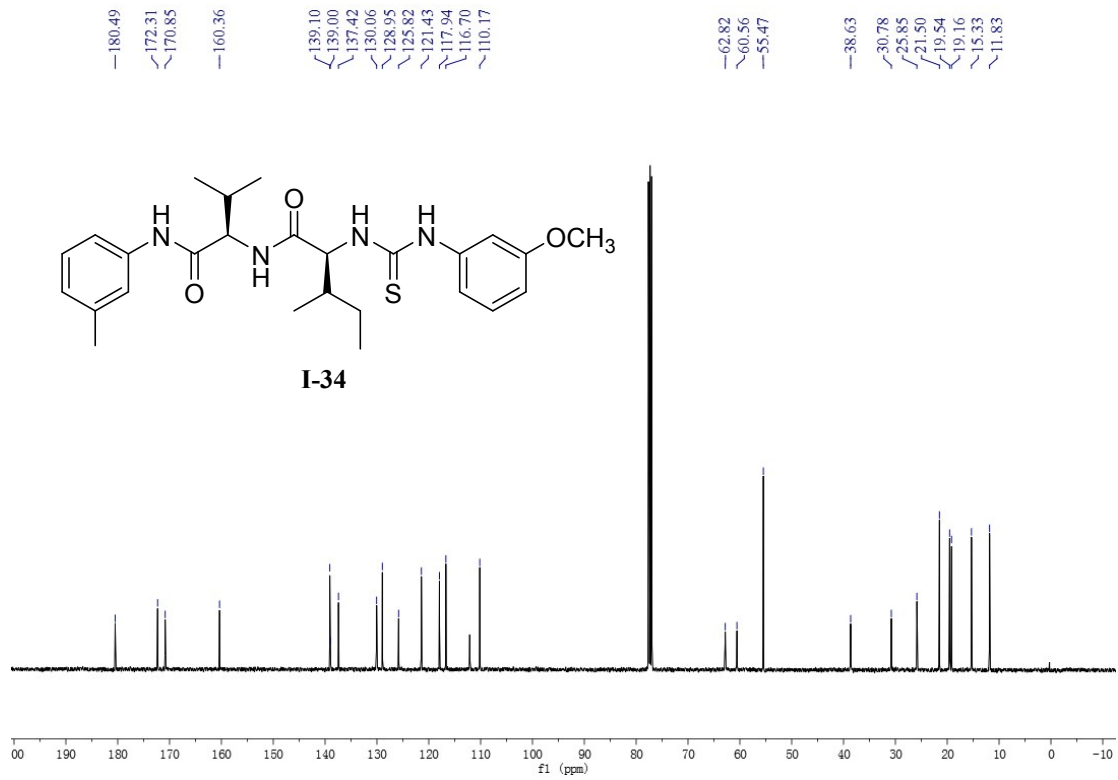

60 #1-37 RT: 0.01-0.13 AV: 37 NL: 1.27E6  
 T: FTMS + p ESI Full lock ms [450.00-550.00]

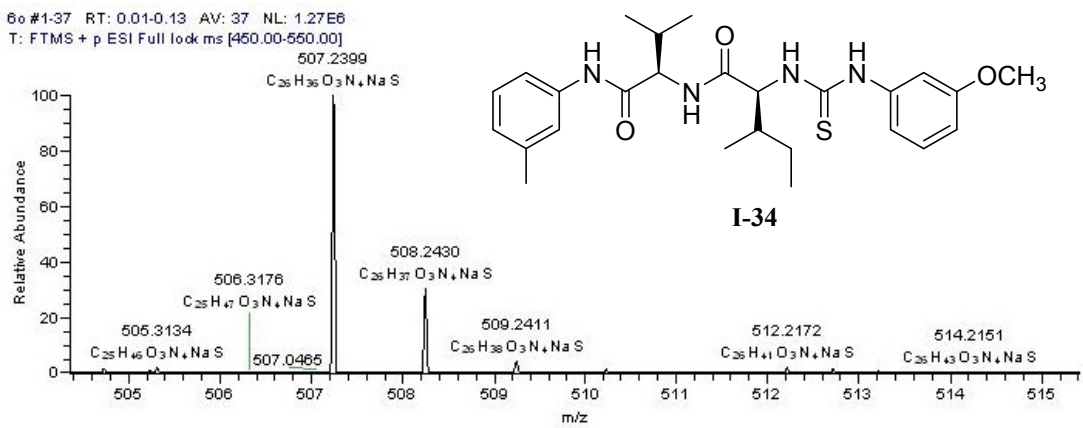

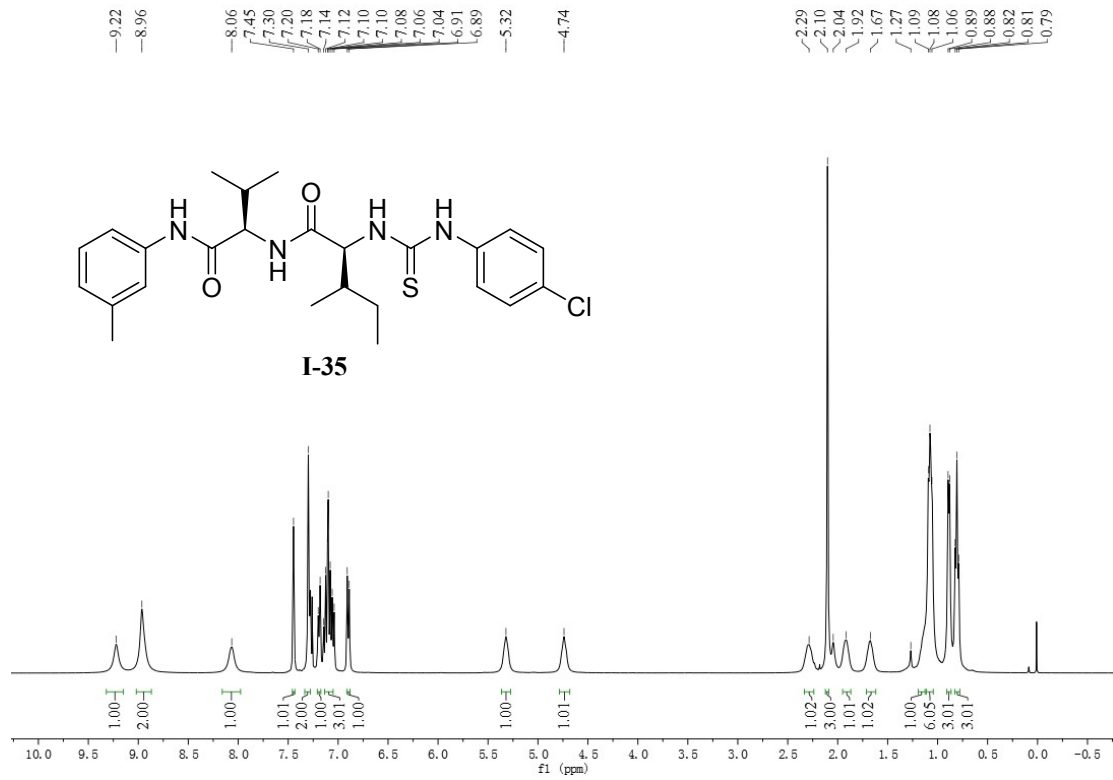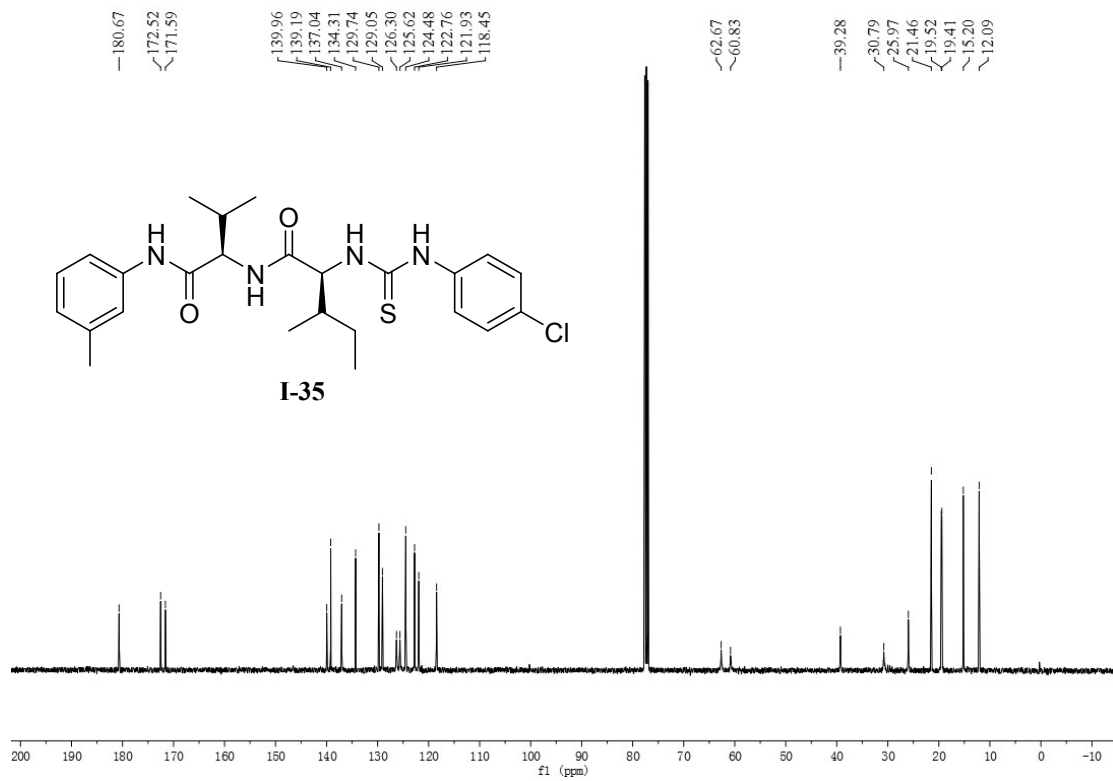

6p #2-23 RT: 0.01-0.08 AV: 22 NL: 8.35E5  
T: FTMS + p ESI Full lock ms [450.00-550.00]

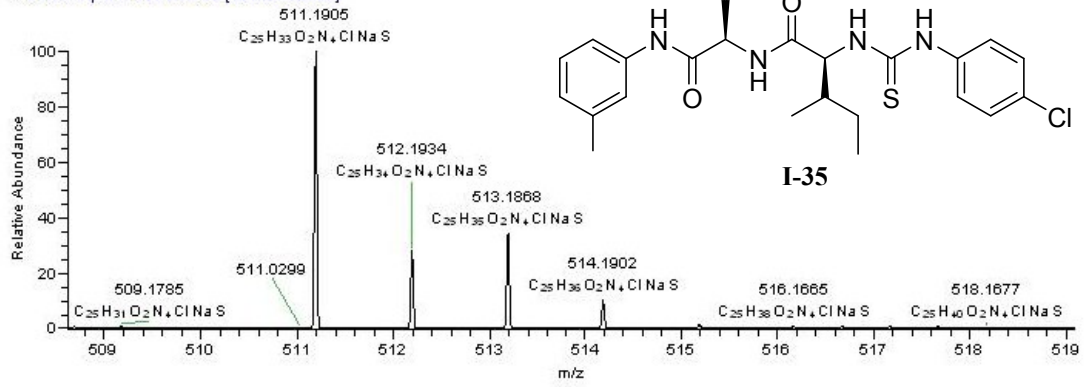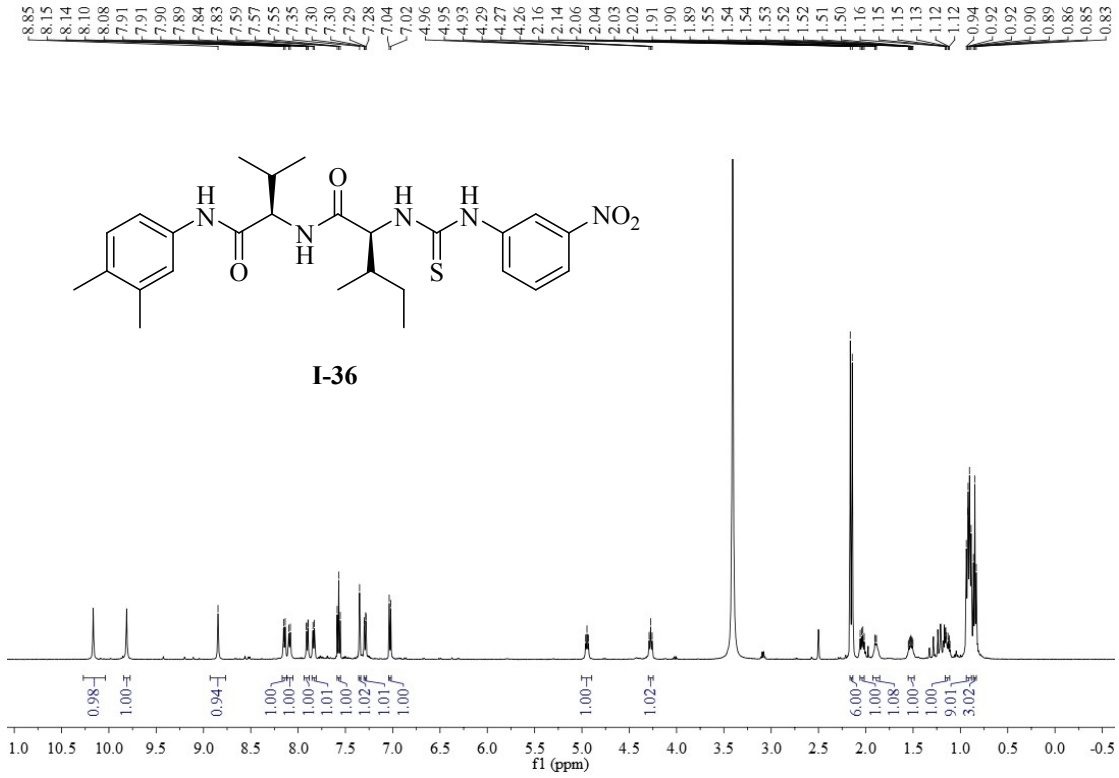



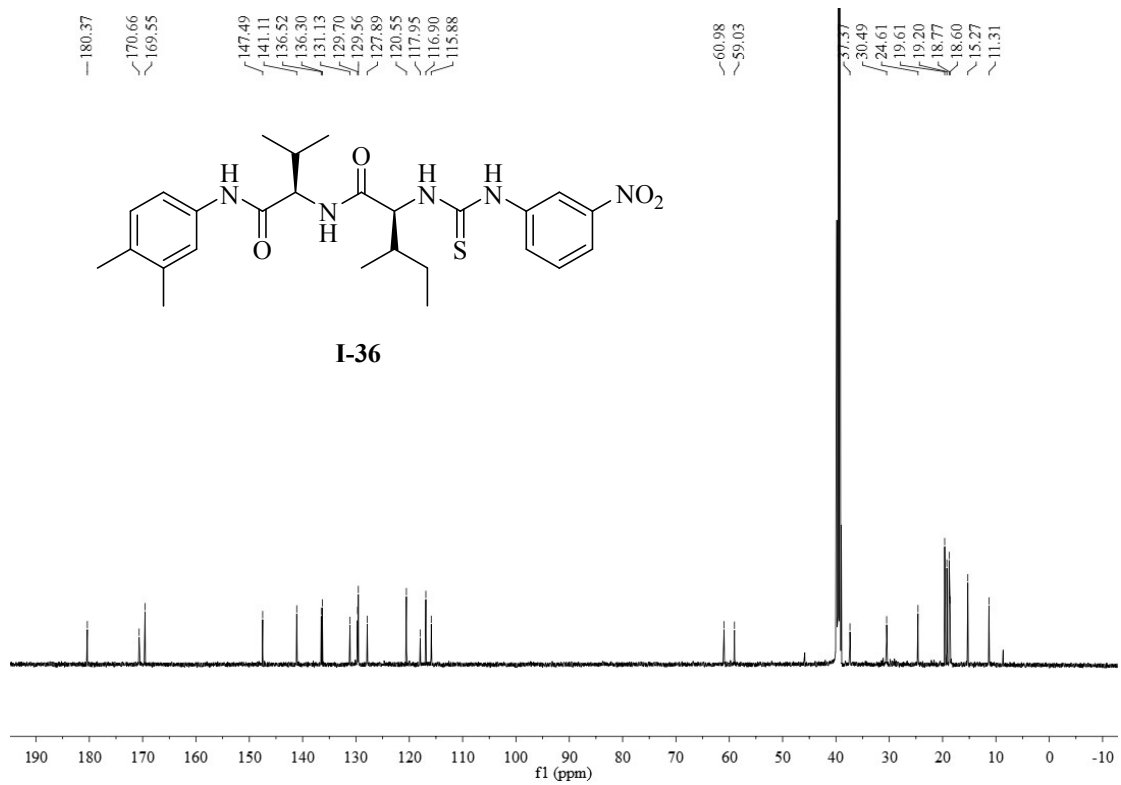

T: FTMS - p ESI Full ms [480.00-530.10]

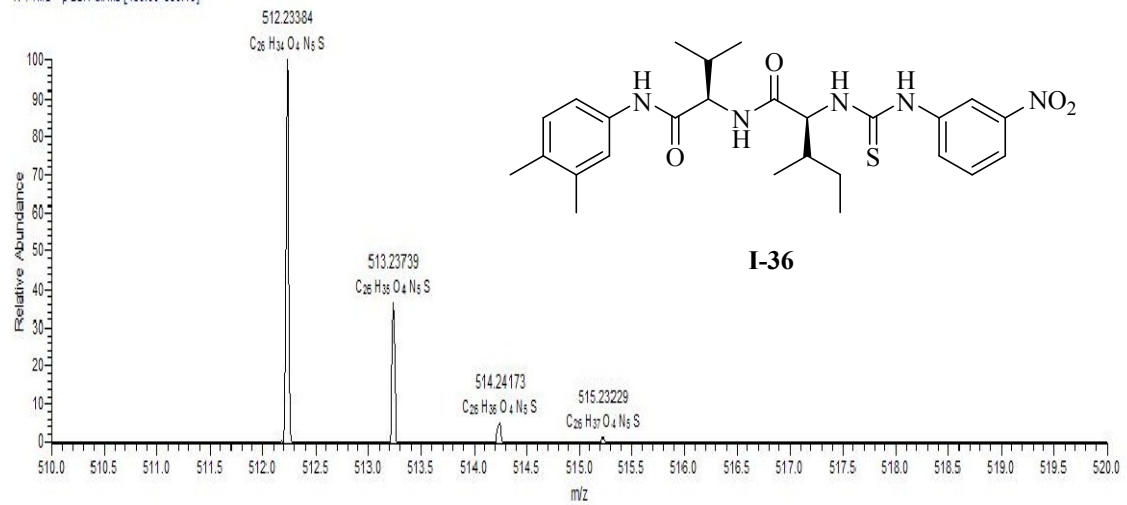

Supplement: c6ra25590f1.pdf [file c6ra25590f1.pdf]
